# Supplementary material for: Epidemiology and treatment outcomes in pediatric patients with post-injection paralysis
Source: BMC Musculoskelet Disord. 2022 Aug 5;23:754. doi: 10.1186/s12891-022-05664-4 (PMC9354298; doi:10.1186/s12891-022-05664-4)
Supplement: Supplementary file 1 — Additional file 1. [file 12891_2022_5664_MOESM1_ESM.xlsx]

## Sheet: Legend of Table
Supplementary Table 1
Raw data that was anayzed for the manuscript. Variables are listed in the top row.

## Sheet: raw data
Study #	Initial clinic presentation date	date of operation	DOB	age at operation	Current age	Sex	district	Weight	Height	BMI	MUAC	Tribe	Immunization status	Sx	Diagnosis	date of injection	(Age at onset)	Time fromdate of injection to initial clinic date	onset time of sx from injection	type of injection	personnel responsible for injection	indication for injection (i.e. vaccination, malarial treatment, pain)	characterization of pre-operative foot deformity	assessment of pre-operative function (i.e. motor assessment and gait)	Surgical Procedure conducted	non-surgical care provided (i.e. PT, bracing)	Side of procedure	Site of procedure	post-operative care	post-operative complications	post-operative outcomes	Fitted with brace (i.e. AFO)	physical therapy follow-up		pre-op indications/ notes	Second procedure date	Second procedure conducted	post-op outcomes	PT follow up		pre-op indications/ notes	Third procedure date	thirdprocedure conducted	post-op outcome	PT follow up notes		pre-op indication	Fourth procedure date	fourth procedure conducted
101	2010-05-16	2010-06-28	2003-11-23	6.59722	16	F	Mukono	19 kg							PIP Pes EVS Rt	2006-01-01	2.10556	4.375		quinine injection		malaria	equinus deformity of the foot		percutaneous achilles tendon lengthening		right	foot	d/c home. Ambulate on crutches. R/V in 4 weeks for cast removal. To follow up in 6 months for TP activity evaluation
102	2010-11-02	2010-08-04	2002-09-03	7.91944		M	Luwero	24							PIP Pes EVS Rt foot, post posterior	2004-03-03	1.5	6.66389		eqnn injection(?)			equinovarus of foot	weak dorsiflexion	manipulation and casting of club foot		right	foot	d/c to KCH, continue daily dressing and complete cloaxicillin dosage. To complete cast if wound closed. Otherwise ambulate on crutches and ruber sole. To rv in 4 weeks for cast removal and AFO	post surgical ulcer, found septis islands on posterolateral rt heal wound.		AFO
103	2010-08-03	2010-08-13	2004-01-01	6.61667		M	Wakiso	20							Lt. PIP	2006-01-01	2	4.58889					equinus deformity of the foot	not able to achieve adequate dorsiflexion of the foot. foot in 20 degrees of equinus	percutaneous achilles tendon lengthening	BK cast	left	foot	d/c home, casdt for 2 weeks, mbulate on crutches and rubber sole; rv in 2 weeks				PT for tibialis posterior
104	2010-11-02	2010-09-14	2002-09-03	8.03056		M	luwero								PIP Pes EVS Rt foot, post posterior								15/6/2010- pes equino varus supinatus	15/6/2010-pip. Pes equino varus supinatus partially corrected by casting. Presence of a small scar result of tenotomy of the rt achilles tendon done in the past. Plan: check x ray. Rt foot. To review on Tuesday. 31/9/2010- granulating wound in the posterior medial side of the rt foot result of posterior capsulotomies in PES. evs post injection. plan: to be reviewed by plastic surgeon for possible…	debridement and SSG of ulcer		right	foot	analgesia. Antibiotics. Keep limb elevated. Graft check in 5 days.		27/9/2010-two cast had been applied after surgery and there's recurrence of the equinus deformity. Plan: reapply a short leg POP trying to dorsiflex the foot. To review in 1/52 for possibel remanipulation under GA. 2/11/2010- off POP today. Walks quite well. has about 5 degrees dorsiflexion only. plan: continue with aFO. review in 4/52.	AFO
105	2010-08-19	2011-01-05	2001-01-01	10.0111		M	Wakiso	30							PIP with equinovarus	2006-01-01	5	4.63333					equinovarus	power of tibialis posterior is 2+	under tourniquet, prepped and draped the patinet, through posteriomedial incision and extended it proximally through the old scar (of achilles tendon lengthening) and identified neurovascular bundle, protected it then did soft tissue release, washed and closed wound, then applied below the knee POP.	cast	right	foot	elevate the foot, monitor vital signs and right toes capillary refil. Rx as per chart. Remanipulation on 19/1/11	debridement and SSG of ulcer			walking exercises
106	2011-08-18	2011-08-24	1996-01-01	15.6472		F	Gulu	42							PIP with equinus								equinus of left foot; had ATL surgery in past, but foot is still in equinus		open ATL, through the old scar, exposed tendoachilis and did Z- lengthening of the tenosn, repaired using vicryl		left	foot	discharge home via acheru, cast fro 2/52, review for remanipulation	debridement and SSG of ulcer
107	2012-12-11	2013-01-04	2005-01-07	7.99167		F	Kampala	30							Equinus Rt. In PIP	2006-01-01	0.983333	6.94444				malaria and febrile treatment	cavus, equinus of rt foot with a small wound of the 4th toe.		percutaneous achilles tendon lengthening		right	foot	discharge to namutamba. Review for remanipulation on 11/1/13. 5/1/13- 2nd day post POP.		5/1/13- 2nd day post POP. Good capillary refill. No edema. 7/1/12- cast well tolerated. Plan: physio for crutches and tyre. Remanipulation on 11/1/12. 14/1/2013- cast well tolerated. Plan: avail tyre. Cast for 4/52. RV after 4/52.		2013-01-07			2013-01-11	remanipulation	cast for 4 weeks				2016-06-24	percutaneous ATL done	21/6/17- foot is still equinus. POP tolerated. Patient will benefit from mid foot osteotomy. 21/7/2016- had ATL, but foot remained in equinous.				2016-11-28	mid-tarsal osteotomy for equinus
108	2012-12-18	2013-01-08	2002-10-13	10.2361		F	Mukono	29							PIP Lt	2010-01-01	7.21667	2.96389	imother reports paralysis immediately after injection	quinine gluteal injection			mild equinus and varus deformity. Soft foot	18/12/12-A, J, zero degrees. Noted forefoot adduction left. Progressive deformity of the left foot over 2 years after injection in the gluteus. Walks with a limp. No other complaints.	percutaneous achilles tendon lengthening		left	foot	a pair of crutches NWB. Will need TPT anytime after 3 months meanwhile, will use AFO- mold to be taken after 6 weeks.		9/1/2013- cast well tolerated. Plan: avail crutches with acheru. Keep around. 10/1/2013- no major complaints today. Plan: d/c home today after providing tyres. To get crutches from acheru. r/v in 6 weeks for AFO. For tibialis posterior tendon transfer during 1st term holiday break. 9/5/2013- follow up visit: she is tolerating a hinged aFO quite well. O/E: mild forefoot adduction. strong dorsiflex…	AFO
109	2011-09-13	2013-01-14	2008-07-14	4.5		M	Wakiso	14						weak right leg and foot deformity	Rt PIP	2011-08-01	3.04722	0.116667	1 month	quinine injection			equinus and supinated right foot, some degree of varus; received 2 years of PT before surgery, yet presents with persistent foot deformity	some activity in the tibialis posterior muscle; absent/ weak dorsiflexion on 21/3/2013. progressive worsening left buttock pain, foot still in equinus and supinated, hind foot in varus, some degree of cavus. Tibialis posterior strong 5/5, tibialis anterior 4/5, peroneals less than 3/5 on 2/12/2013	percutaneous achilles tendon lengthening	PT, cast, AFO	right	leg			2/1/2014- foot is well positioned.
110	2013-01-08	2013-01-14	2001-01-01	12.0361		F	Wakiso	30							Rt foot PIP	2005-01-01	4	8.01944	progressively worsening right foot deformity since injection in 2005	quinine gluteal injection			right foot equinus and mild varus. Cavus deformity.		percutaneous achilles tendon lengthening		right	foot	elevate the foot, monitor blood supply, POP for 4/52. D tomorrow.		15/1/2013- post ATL and planta fasciotomy. Plan:1)DC today. 2) POP for 4/52. 3)Tyre x crutches in KAT. 4) R/V after 5 weeks
111	2012-12-06	2013-05-02	2004-01-01	9.33611		M	jinja	25							PIP Rt foot. Rt great toe PBC								14/1/2013- right foot is equino cavus, with slight varus of hind foot. There is also deformity of the hallux, both at MP and LF joints. Plan: percutnaeous aTL and fasciotomy and POP. After POP removed, AFO used. Evaluation of the muscle power (TA and TP)/ 1512013-: no major complaints today. maintain POP x 4/52. RV in 4 weeks		archilles tendon lengthening		right	foot	r/v in 4/52 for cast change and AFO		9/4/2013-no new complaints. Still walks on the lateral border of the right foot. No equinus. O/e: no equinus. Still forefoot adductus of midfoot cavus. Still heel varus. Tibialis anterior power 0/5. tibialis posterior power 4/5. peroneii muscles power 3/5. plan: RV in 1st term holidys for tibialis posterior tendon transfer. 4/6/2013- PRP removed. foot inspection. all the wounds are clear. apply P…	AFO				2017-02-02	burns contracture release and FTSG
112	2009-07-14	2013-01-18	2002-12-22	10.0722		M	Mukono							2 yr hx of pain in let knee , walking with a limp, no flexion contracture of lt hip, no pain on movement	PIP Lt. foot										percutaneous achilles tendon lengthening		right	foot
113	2013-01-15	2013-01-18	2009-01-01	4.04722	10	M	gulu	17							Rt PIP										percutaneous achilles tendon lengthening		right	foot	maintain Pop for 1 month. Elevate the limb. Discharge home.		19/2/2013- h/o progressive rt foot deformity x 2 years after injection gluteal muscles. Post ATL and plantar fasciotomy on 18/1/2013. 23/4/2013- doing well better. Mild foot drop rt foot-well corrected. Has aFO.	AFO
114	2013-01-11	2013-01-18	1996-04-17	16.7528		M	Lira	53						15/1/2013- deformed, painful left foot for 15 years. Walks on dorsum and lateral border of foot with intermittent pain.	PIP with equinus	1998-01-01	1.70556	15.0278		gluteal injection			equinovarus foot with inversion. Calloused lateral border		triple arthrodesis		left	foot	discharge home. Review after 4 weeks. Cast for 4 weeks.		20/1/2013- good toe perfusion monitored. Patient not elevating foot. Plan: advised to elevate foot. Await cast change. 21/1/2013- doing well. wound well healed. mild swelling aceeptable position. Plan: short leg cast/ can walk on it. return in 6 weeks for cast removal. AFO molding x then fit when ready. Remanipulation on wed 23/1/2013. 23/1/2013- done: wound inspection, remanipulation and cast ch…	AFO
115	2013-01-15	2013-01-21	2002-01-01	11.0556		M	Kampala	26							PIP Lt Foot (post str)	2004-01-01	2	9.03889		gluteal injection		febrile illness	equinovarus deformity, foot flexible. Limping gait left foot, walks on lateral foot border.		percutaneous achilles tendon lengthening		left	foot	dsicharge home through katalemwa, avail crutches and tyre for ambulation and cast protection. Keep cast for 6 weeks. Review after 4 weeks for cast inspection.		22/1/2013-no major complaints. Awaits plan. 23/1/13- no complaints. 24/1/2013- manipulation and casting. D/C home there after. E/V/ 6 weeks for cast remove. Mold aFO, recast, fit AFO when ready. 25/1/2013- wound inspection, change of decision. remanipulation and castign done. plan: 1) maintain cast for 6 weeks. 2) discharge home (to KAT) over the weekend. 3) R/V after 6/52 for cast removal and AF…	AFO
116	2013-01-23	2013-01-25	2006-09-26	6.33056		F	Isingiro	16							Lt PIP								left foot drop/ equinovarus deformity.		percutaneous achilles tendon lengthening		left	ankle			25/1/2013- good toe perfusion. R/V. avail tyre and crutches. 29/1/2013- plan 1) for remanipulation on 1/2/2013.					2013-02-01	manipulation and casting	4/2/2013- doing well. Plan: avail tyre and crutches. R/V/ after 4/52. 6/3/2013- doing well on POP for 4/52. plan: remove POP and provide AFO. r/v/ with aFO. 16/4/2013- doing well on aFO. Pan: r/v after 6/12 for reassessment of the muscle activity of the left foot.
117	2013-01-23	2013-01-28	2006-12-14	6.12222		M	Luwero	15							PIP Lt Post ATL	2010-01-01	3.04722	3.06111		gluteal injection			left foot with varus and equinus. Had manipulation and casting 3x from Jinja hopsital, but with no significant change.		percutaneous achilles tendon lengthening		left	ankle	elevate limb in the ward. Monitor circulating. Analgesics as per chart.		29/1/2013- o major complaints today. Plan: D/C/ home today. Re admit on 3/2/13 for remanipulation on 4/2/2013.					2013-02-04	manipulation and casting	5/2/2013: no major complaints. Plan: D/C home today. Crutches and tyres. R/V/ in 4 weeks. 6/3/2013- has been on POP for 4/52. plan: remove POP and provide AFO. r/v/ with aFO. 6/3/15- AFO measurements. Apply cast future date 12/3/15.9/5/2013- doing well on aFO. gait improves with the splint. plan: continue with aFO. R/V/ with 6/12. 1/8/2013- recurrence of deformity. o/e: slight equinus, hindfoot v…
118	2012-12-11	2013-01-28	1997-06-06	15.6444		F	Lira	30						difficulty swelling	PIP Lt	2009-01-01	11.5694	3.94444		gluteal injection			pes equinus varus left	no dorsiflexion	TP tendon transfer. Transferred the insertion of the tibialis posterior tendon to the dorsum of the foot on the lateral cuneiform.		left	foot	discharge home with crutches and tyre for ambulation through katalemwa, split cast in opd cast room, cast for 6 weeks, review after 6 weeks.		29/1/13- c/o pain in left foot. Plan: 1. split cast. 2. consider dk tomorrow. RV in 6/52.
119	2013-01-22	2013-01-28	1997-01-01	16.075		M	Kabale	41							PIP (Talipes equinovarus)	2010-01-01	13	3.05833		quinine IM injection			left foot equinus varus.	22/1/2013- tense achilles tendon or dorsiflexion. Tense plantar fascia22/1/2013- PIP/equinovarus deformity. Recommendation: ATL and triple arthrodesis. Will need aFO after admit 27/1. surgery on 28/1.	triple arthrodesis		left	foot	1.elevate leg on 2 pillows. 2. monitor circulation and splint cast prn. 3. cast change Friday 1 february 2013 for wound check.		29/1/13- remanipulation on Monday. Give tyre and crutches. 31/1/2013- doing fine. Plan: 1) wound inspection and cast change tomorrow. 1/2/2013- awaiting surgery today. In the meantime, apply simple dressing on wound. 4/2/2013- await tomorrow for manipulation and casting plan. change dressing. 5/2/2013- plan 1) for remanipulation on 6/2/2013. 7/2/2013- plan 1) send to hostel with cruthces. 2) rema…		29/1/2013- issued axillary crutches. Gait re training done (NWB)			2013-02-13	manipulation and casting of cub foot post triple arthrodesis	13/2/2013- post tripel arthrodesis, wound looks good, manipulation done, foot plantegrade applied cast, good circulation. 14/2/2013- plan 1)D/C/, R/V in 6/52.
120	2010-07-13	2013-01-30	2007-01-01	6.08056		M	Kampala	16							PIP lt foot with equinous + Lt foot								equinus of left foot, left foot drop	strong tibialis posterior function, weak tibialis anteriro function and extension	percutaneous achilles tendon lengthening	AFO	left	foot	discharge home, cast for 4 weeks then review for AFO and to plan for tendon transfer, avail crutches and tyre	plantigrade and flexible		AFO
121	2013-01-24	2013-01-31	2004-01-31	9		M	kampala	23							Left foot PIP	2010-01-01	5.91944	3.06389		gluteal injection			left foot- equinovarus	24/1/2013- good muscle power.	achilles tendon lengthening		left	foot	1)elevate the left foot. 2)remanipulation after 1/52 (6/2/2013). 3) D/C to hostel when stable		1/2/2013- transfer to hostel- readmit on 5/2/2013 for michael. 6/2/2013- remanipulation and POP done. Plan 1) D/C, R/V in 1/12.		1/2/2013- remanipuation on 6/2/2013. issued axillary cruthces (35")			2013-02-06	manipulation and casting of club foot post ATL	7/3/2013- off POP today. Still heel varus. Plan: provide aFO. R/V after 6/52 with AFO to assess the gait. 4/4/13- still has varus nd forefoot adduction with an acitve TAT. Plan: 1) for tibialis anterior tendon transfer during the 1st term holiday. 2) r/v in 1st term holiday meanwhile continue aFO day and night
122	2013-01-28	2013-02-01	2001-05-12	11.7194		M	kapchorwa	38							PIP Lt foot	2005-01-01	3.63611	8.075				febrile illness	20/1/2013- mild equinus, forefoot adduction and mild supination.	20/1/2013- TP and TA- 0/5. plan: 1) for ATL and POP on Friday, then give AO, do triple arthrodesis later f it fails to correct. 2) admit Thursday 31/3/2013.	percutaneous achilles tendon lengthening		left	foot	elevate foot. Remanipulation on 8/2/2013.		7/2/2013- had percutaneous ATL and POP on 31/1/2013. POP is still intact. Plan: 1) for remanipulation tomorrow, admit ward today. 1/3/2013- doing well. Plan: 1) remove pOP take negative cast and give AFO then r/v.	AFO				2013-08-02	remanipulation left foot
123	2013-01-23	2013-02-04	2010-01-01	3.09167		F	wakiso	15							Rt PIP	2012-01-01	2	1.06111	drop foot noted december 2012	gluteal injection			right foot drop	23/1/2013- good muscle power, tibialis anterior muscle injury	TP tendon transfer. Foot hardly reaches neutral position. 3 step percutaneous achilles z plasty done. Achieved 20 * of dorsiflexion. Three incision technique right tibialis posterior laterally to the cuboid through the interroseous membrane tagged plantarward using vicryl 2/0. closed skin with subcut 3/0 monocryl. foot in excellent position and well perfused.		right	foot	paracetamol 250 g 8 hourly for 3 days. Review after 4 weeks fot POP removal and AFOs		23/1/2013- right foot drop. Muscle injury to tibialis anterior muscle. Foot drop gait. Plan: schedule for tibialis posterior tendon trasnfer on 4/2/2013	AFO				2013-02-04	TP tendon transfer	5/2/2013- post TP transfer. Doing well. Plan: D/C to home. R/V 6/52. 18/3/2013- s/p tibialis posterior tendon transfer wounds healed, tendon working. Plan: aFO activity, as tolerated. Return to clinic 6 weeks. 18/4/13: foot plantegrade. Transferred tibialis posteiror working well. fitted with aFO. Plan: AFO day and night for 3 months. R/V in 3 months. 14/1/2014- transfered tendon over pulling the…	5/2/2013- availed crutches and pOP tyre. Ambulated on crutches and explained precautions to mother. 8/5/2014- issued crutches and tyre.
124	2013-01-29	2013-02-06	2009-01-01	4.09722		F	wakiso	15							Lt PIP					gluteal injection			left foot in equinovarus		percutaneous achilles tendon lengthening		left	leg	elevate foot, monitor blood circulation to toes. R/v for possible D/C 2 weeks in MWR.		7/2/2013- plan 1)get crutches + tyre. 2) D/C R/V in 4/5 for control. 7/3/2013- 4/52 post ATL. Doing well. Plan: 1) remove plaster. 2) AFO.	AFO	7/2/2013- ambulation exercises done. Crutches provided.
125	2013-01-29	2013-02-08	2005-01-01	8.10278		m	wakiso	24							PIP Lt	2010-01-01	5	3.07778	since 2010	quinine IM gluteal injection			29/1/13- pes equinovarus	29/1/13- 9 yo boy presented with left foot deformity x 3 years after receiving an IM injection of quinine 3 years ago. h/o associated gluteal abscess which was successfully managed. Fahter reports critically had parasesis of both lwoer limbs which later progressed to a left foot deformity. able to walk thru with a limp. local oe: left pes equino varus. tense achilles tendon or assisted dorsiflexi…	percutaneous achilles tendon lengthening		left	foot	elevate the left leg. Monitor toe circulation closely. Treat as per treatment chart. POP for 3 weeks then AFO. Discharge tomorrow if OK.		11/2/2013- plan: avail tyre and crutches. r/v after 3/52. physio: ambulation done using axillary crutches. Tyre provided. 28/2/2013- post ATL and Pop lt foot. Lt foot is plantegrade, flexible. Difficult to assess tendon function. Plan: give AFO then r/v, do foot exercise. 7/3/2013- pt has gotten AFO today. left foot is well corrected. plan: 1) use AFO day and night. vigorous foot exercises. 2) r/…	AFO
126	2013-01-23	2013-02-11	2009-02-23	3.96667		F	mukono								Lt PIP	2009-08-01	0.438889	3.47778					equinovarus deformity	a 3 yo girl presenting with an equinovarus deformitng of the lt foot. Hp of injection at the age of 6/12. she seeked rx from mengo hospital where she received therapy and afo, however she reports not having gotten change. She later changed to mulago hospital. there the child was given vit B complex and neurosis drugs. the mother reports no improvement. 23/1/2013- left foot curving following glute…	percutaneous achilles tendon lengthening		left	foot	elevate foot, provide tyre and weight bearing as tolerated. Will keep cast for 4 weeks then take AFO mold and fit when ready.		12/2/2013- plan 1) d/c main cast for 4/52. then rx 31/7/2013- still has foto drop and inversion of the foot. Has grade 5 power of tibialis posterior and no equinus. Tibialis anterior and peroneii have no power. Plan: for tibialis posterior tendon transfer on 14/8/2013. 15/8/2013- plan 1) avail tyre, crutches. 2) d/c r/v 6/52.	AFO
127	2012-08-14	2013-02-20	2007-01-01	6.13611		M	luwero								Right PIP								14/8/2012- rigid equinus	14/8/2012- result of rigid equinus rt foot with difficulty in walking and running. OE: walks with a limp. Lt lower limb is larger than the rt. Neurologically NAD. Imp: impartial growth of the lower limb. Plan: x ray bilateral knee. To follow up after 6/12.	percutaneous achilles tendon lengthening		right	foot	elevate the limb. Maintain cast for 4 weeks. Provide tyres and crutches.		4/4/2013- 6/52 post ASTL. Pop off, doing well. 4/7/2013- 4.5 months post op. no new complaints. Oe: mss: normal rt foot position, with power 4/5. L4 and S1 myotomes. Noted blister lateral aspect rt mid foot. Plan. 1) adjust afo. 2) review after 6/12. 14/3/2014- rt foot-plantegrade flexible. rt ankle joint normal. has not been using afo x 7/12. plan: continue foot exercises. review after 6/12. 30/…
128	2013-02-21	2013-02-25	1998-11-09	14.2944	20	M	oyam	58							Rt PIP							febrile illness	21/2/2013- equinus	21/2/13- h/o injection for a febrile illness. Deformity of right foot since then. Had m+c x3 at aderu. Clinically- has equinus right foot with tight tendon achilles. Mildforefoot adduction. Tibialis anterior and posteiror active. Dx: right pIP. Plan: 1) for percutaenous ATL on 25/2/2013. admit 24/2/13.	percutaneous achilles tendon lengthening		right	foot	discharge home. Review for remanipulation on 4/3/2013.		26/2/2013- plan: d/c home today. Readmit on 3rd. For remanipulation on 4/2/2013. 4/3/2013- remanipulation with short leg cast done. 5/3/13- plan 1) for remanipulation on 11/3/13. 6/3/2013- plan: awaits remanipulation on Monday 11/3/13. meanwhile, admit to hostel. 11/3/2013- remanipulation done. 12/3/2013- post remanipulation. equinus is corrected but still has forefoot adduction. plan: 1) for mid…
129	2013-02-26	2013-02-27	2010-08-04	2.56389	8	F	rakai	10							PIP Lt foot	2012-01-01	1.40833	1.15278	since 2012			febrile illness	equinus	26/2/2013- h/o progressive deformity of lt foot x 8 months. Preceded by febrile illness for hich she got an injection and later after 2 months the parents noted deformity. No h/o acute flaccid paralysis. Has not been udnergoing any treatment.	percutaneous achilles tendon lengthening		left	foot	discharge home today. Provide tyres and crutches. Review in one month for clinical control.		28/2/2013- no major complaints today. Foot still in equinus. Plan: for remanipulation next Wednesday. Meanwhile admit to hostel. 7/3/2013- plan: for remanipulation next Wednesday. Meanwhile admit to hostel. 14/3/13- plan d/c r/v in 1/52.
130	2013-02-26	2013-02-27	2004-01-01	9.15556	15	F	wakiso	21							Right PIP	2008-01-01	4	5.15278						26/2/2013- history of injection 5 years ago. And now deformity of right foot. Has had 3 serial casts so far.	TP tendon transfer. Percutaneous achilles lengthening and plantar fasciotomy, 3 incision approach, transferred tibialis posterior tendon, transinterrosseous laterally to the cuboid, used No 1 for transfixation through the bone tunnel and button plantarward. foot plantargrade.		right	foot	elevate foot, will keep cast for 6 weeks and when back, mold and fit AFO.		28/2/13- post TP tendon transfer. Doing well. Toes are pink and Pop is firm. Plan: 1) d/c home tomorrow. 2) r/v 3/52.	AFO	28/2/13- seen and done training in ambulation with crutches. To get crutches this afternoon. 16/4/2013- off pop today 6/52 post tibialis posterior tendon transfer. The wounds have healed. 14/5/2013- doing well. Rt foot well corrected. Transfer tendon in active 4/5. 14/8/2013- doing well withotu any residual foot drop even withotu aFO. plan: discontinue aFO. review after 3/12. 14/11/2013- doing we…
131	2013-02-26	2013-03-01	2006-04-11	6.88889	13	F	kampala	17							Lt PIP	2007-10-01	1.47222	5.40278		gluteal im injection			26/2/2013- left foot equino varus	26/2/2013- 6 yo presented with progressive lt foot deformity. h/o gluteal injection at the age of 1/5 years. This has been progressively worsening.	percutaneous achilles tendon lengthening		left	foot	provide walking tyre shoe, a pair of crutches, PWB. Discharge home tomorrow, return to clinic in 6 weeks for cast removal, mold AFO and fit when ready.		17/4/2013- 6/52 on pop post percutaneous ATL lt in PIP. Plan: off pop today. Provide afo. r/v with afo after 4/52. 30/5/2013- reports that the afo got broken. She walks quite well without a foot drop. Plan: continue PT form home.	AFO	30/5/201- noted the findings. Doing well 10 degrees dorsfiflexion plan: exercises
132	2013-02-28	2013-03-04	2004-08-08	8.57222	14	M	kabenge	27							Rt PIP	2007-01-01	2.39722	6.15833		gluteal IM injection			28/2/2013- equinovarus	28/2/2013- 8 yo boy with a h/o progressive inward curving of the rt foot started at the age of 3 yo following a gluteal injection to treat a chronic ulcer on the right leg. Has undergone serial casting 4 times. With no significant improvement, now limps while walking, with severe pain in the right ankle. also developed loose motions yesterday with associated abdominal pain, stool 3 bloody stained…	percutaneous achilles tendon lengthening		right	foot	elevate the limb, consider remanipulation on Monday 11/3/2012		5/3/13- plan: 1) get tires and crutches, keep in hostel. 5/3/13- availed pop tyre and crutches. Ambulated on crutches. 6/3/13/- no new complaints. Awaits remanipulation, next Monday on 11/3/2013. meanwhile admit to hostel. 12/3/2013- d/c home. R/V in 6/52 for AFO fitting.	AFO
133	2013-03-12	2013-03-13	2000-01-01	13.2	19	M	kibaale	30							Results of PIP Lt foot post ATL	2001-01-01	1	12.1972	since 2001.	im injection gluteal			12/3/2013- severe equinus deformity of lt foot.	12/3/2013- progressive lt foot deformity x 12 years. Preceded by im injection in the gluteal region in early infancy. Had serial manipulation and casting x 4 with little improvement.	percutaneous achilles tendon lengthening		left	foot	elevate limb, monitor toe circulation, r/v on MWR.		14/3/2013- no major complaints, foot still in equinus. Plan: for triple tomorrow.		14/3/2013- ambulation trainign done. Crutches provided.		15/3/2013- midfoot osteotomy post poned due to edema of the foot. Applied POP on equinus, d/c home. r/v in 6/52 for midfoot osteotomy.	2013-05-08	triple arthrodesis	16/5/2013- plan 1) d/c home, r/v in 6/52. 27/6/ 2013- 7/52 weeks post arthrodesis lt foot. Oe: clean foot. Normal dorsiflexion. Plan: 1) for AFO measurement, molding and fitting when ready. 2) meantime short leg cast. 3) review with AFO fitted. 1/8/2013- no new complaints r/v in 3/12. 3/10/2013- reports the AFO strapping broke off a week ago. oe: ambulating well with no pain. plan: 1) to workshop…
134	2013-04-02	2013-04-03	2010-01-01	3.25556	9	M	mubende								PIP Rt foot	2012-01-01	2	1.25278		IM injection		febrile illness		2/4/2013- 4 yo with a h/o IM injection for treatment of febrile illness. Developed weakness of rt leg that progressed to deformity of rt foto since the age of 2.5	percutaneous achilles tendon lengthening		right	foot	elevate the limb. Reivew on MWR tomorrow.		4/4/13- mwr no major compalints today. Plan: d/c home on tyre and crutches. r/v in 4/52 for SFAB.
135	2013-04-10	2013-04-15	2008-01-01	5.28889	11	M	kamwenge	24							PIP Lt foot	2008-01-01	0	5.275	since 2008	IM gluteal injection			11/4/2013- equinovarus deformity	11/4/2013- c/o progressive deformity lt foot x 5 years. Proceeded by IM injection into lt gluteal. He had several casting of the foot with no improvement at ours 3 years ago. Ros: unremarkable. Oe: callosed lateral obrder of foot. Equinus, varus hindfoot and suprinated midfoot. weak extensors of ankle. impr: pip lt foot with equinovarus deformity	percutaneous achilles tendon lengthening		left	foot	monitor toe circulation. Booked for triple arthrodesis on 17/4/2013.		17/4/2013- tripel arthrodesis done. 18/4/2013- plan: fot cast cahnge next week on Wednesday. Elevate the limb. 19/4/2013- plan: await cast change next Wednesday. Meanwhile admit to hostel. Readmit on Tuesday next week for tyre. 25/4/2013- doing fine. Plan: reinforce cast today in the clinic. then discharge home. 2) see in 6/52 for cast removal then AFO measurement then recast. await aFO.	AFO
136	2013-04-19	2013-04-26	1996-01-01	17.3194	23	F	lira	47							Equinus Rt. Foot in PIP					gluteal IM injection			23/4/2013- severe equinus rt foot	23/4/2013- pt with severe equinus rt foto of gluteal IM injection as a child. Function of a tibialis anterior and posterior not assessed due to the severe rigid equinus.	percutaneous achilles tendon lengthening		right	foot	elevate the limb, provide tyres and crutches, consider d/c next week		28/5/2013- pop off today. The foot is in good position, flexible, going beyond neutral (passively). There is some activity in TA and extensors of the toes. 16/7/2013- has ulcer rt heel posteriorly. She is heavily pregnant. Plan: wound care, continue with AFO. advised on padding it. r/v after 3/13.	AFO
137	2013-04-23	2013-05-06	2008-01-27	5.275		F	luwero	19							PIP Lt foot	2011-01-01	2.92778	2.31111	since 2011	intragluteal injection		febrile illness	equinus	23/4/2013- PIP post achilles lengthening needs a tendon transfer. Scheduled for Friday. 24/4/2013- c/o lt foot deformity x 2 years. h/o intragluteal injection for a febrile illness with complete paralysis of LL progressively recovered with a residual lt foot deformity. ROS- normal. 2/5/2013- adduction and varus are well corrected. still has equinus with tight tendo-achilles.	percutaneous achilles tendon lengthening		left	foot	remanipulation on foto 13/5/13. elevate left foot.		11/6/2013- pop removed today. Lt foot- flexible with equinus is well corrected. Plan: give aFO then R/v 13/12/2013- has wound lt foot sole. Plan: fot TAT transfer on 6/1/2014. admit 5/1/14/ cps cloxa 250 mg qid x 5/7.	AFO			7/1/2014- post achilles tendon left foot in PIP. Still has equinovarus deformity. Peroneal and extensors weak tibialis anterior 5/5 and tibialis posteiror 5/5. plan tibialis anterior tendon transfer on 10/1/2014.	2014-01-10	TA tendon transfer	28/1/2014- post tendon transfer 10/1/2014, wounds healing fine. Plan cast removed too early, plan recast and review 25/2/2014 for cast removal and mold aFO. 25/2/2014- post tendon transfer, wounds healing fine, foot in fair position. But currently tendon not working, plan recast for 4 weeks then fit AFO. 27/5/2014- post TAT lt leg, afo strap spolited. residual forefoot varus. plan: workshop for a…
138	2013-05-07	2013-05-10	2007-01-01	6.35833	12	F	wakiso	13							Lt PIP Post ATL								7/5/2013- club foot	7/5/2013- 6 yo presented with a neglected club foot.	percutaneous achilles tendon lengthening		left	foot	elevate leg. For remanipulation on 17/5/2013.		19/6/2013- post atl for lt pip. Compelted 4/52 of pop. Plan: remove pop, give afo then r/v. 27/6/2013- lt foot well corrected. Has got afo. Plan: foot exercises. Use afo day and night x 3/12. r/v after 3/12. 12/9/2013- lt foot-flexible and well corrected TA TP tendons are active. plan: continue foot exercises. use AFO day and night. r/v on 12/12/13. 12/12/2013- lt foot is plantegrade. TA and TP t…	AFO
139	2013-05-07	2013-05-10	2004-01-01	9.35833	15	m	mbale	23							Lt PIP Post ATL	2007-01-01	3	6.35	since 2007	gluteal IM injection			7/5/2013- severe equinovarus deformity	7/5/2013- h/o progressive lt foot deformity x 6 years after injection lt gluteus. Had casting and bilateral posteriomedial soft tissue release in nbarura hospital as presented with biltareal ATEV. Reports difficulty finding fitting shoes and pain whiel walking barefooted. oe: FGC, local extant bilateral CTEV with forefoot adduction and slight equinus- hindfoot varus. plan: 1) ortho to r/v to deci…	percutaneous achilles tendon lengthening		left	foot	give tyre, manitain POP for 6 weeks. Reivew in 6 weeks 21/11/2013.		13/5/2013- plan: provide tyres and crutches. admit to hostel meanwhile. readmit on sunday 19/5/2013 for remanipulation on 20/5/2013. 25/6/2013- o/e still has lt mid foto varus deformity. Plan: 1) review with AFO next week. 13/5/2013- provide tyres and crutches. Admit to hostel. Readmit on Thursday 16/5/13 for remanipulation on 17/5/2013. 21/5/2013- doing well. right foot- well corrected and pink …	AFO	13/5/2013- seen and provided crutches 37" and pop tyre. Tonight on ambulation with crutches and he is stable. 27/2/2014- lt foot mobilization exercises. Home program. 24/2/2014- dorsiflexion exercises done. Left muscle dorsiflexion power 2.
140	2013-05-07	2013-05-15	2006-11-15	6.5	12	M	kampala	27							PIP Lt foot	2007-01-01	0.127778	6.35					7/5/2013- equinus varus deformity	7/5/2013- 6 yo boy presented with equinus varus deformity of lt foot. Lt foot drop with forefoot adductus. No equinus. Tb posterior power 5/5. tb anterior and peroneii muscles power 0/5. plan: for tibialis posterior tendon transfer.	TP tendon transfer. Transferred the insertion of the tibialis posterior tendon laterally to the cuneiform. Incisions closed and tourniquet deflated. Dressed and applied a below knee POP cast.		left	foot	elevate limb, monitor toe circulation, rx as per drug chart, POP for 6/52.		16/5/2013- no new complaints today. Plan: d/c home. Provide crutches and tyre. r/v in 6 weeks. 27/6/2014- off pop today. The wounds have healed and the foot is well positioned. Plan: remove stitches. Provide afo. r/v after 6/52 with AFO.	AFO
141	2013-05-07	2013-05-10	2007-01-01	6.35833	12	F	wakiso	13							Lt PIP Post ATL	2009-01-01	2	4.35	since 2010	gluteal quinine IM injection			7/5/2013- equinus rt foot	7/5/2013- neglected club foot.	percutaneous achilles tendon lengthening		right	foot	elevate leg. For remanipulation on 17/5/2013.		17/5/2013- manipulation and casting . 19/6/2013- post ATL for lt pIP. Completed 4/52 of pop. Plan: remove pop, give AFO then r/v. 27/6/2013- lt foot well corrected. Has got AFO. Plan: foot exercises. Use AFO day and night x 3/12. r/v after 3/12. 12/9/2013- lt foot-flexible and well corrected TA and TP tendons are active. plan: continue foot exercises. use aFO day and night . r/v on 12/12/13. 12/1…	AFO
142	2013-05-16	2013-05-20	2011-04-23	2.075	8	M	isingiro	11							Lt equinus foot PIP	2012-01-01	0.688889	1.375	since 2012	gluteal IM injection			16/5/2013- equinus left foot	16/5/2013- h/o progressive deformity lt foot x 1 year. Following an im injection lt gluteal. No h/o attempt of surgical treatment. OE: equinovarus foot . Imp: left equinus foot 2* PIP foot. Plan; 1) for ATL on 20/5/2013. 2) admit on 19/5/2013, check Hb.	percutaneous achilles tendon lengthening		left	knee	elevate the limb. Maintain pop for 4 weeks.		20/5/13: achilles tenotomy done. Plan: pop for 4 weeks. Elevate the limb. 21/5/2013-: no new complaints today. Plan: d/c home today. r/v in 4 weeks for clinical control, POP and bracing
143	2013-05-14	2013-05-22	2006-05-03	7.05278	13	M	mubende	20							Equinus foot Lt PIP	2012-01-01	5.66111	1.36944	since january 2012.				14/5/2013- left foo equinus.	14/5/2013- c/o deformity lt foot x 1.5 years after an injection. Mother reports attempted correction with no success. Has come for surgery. Dx: pIP left foot in eqinus	percutaneous achilles tendon lengthening		right	foot	discharge home tomorrow. Return to clinic in 6 weeks for cast removal. Mold aFO, recast and fit AFO when ready.		23/5/2013- no new complaints today plan: discharge home today. provide tyres and crutches. rv in 4/52. 20/6/2013- 4 weeks post ATL due to lt foot pIP. Cast off today. Clinically: foot in plantegrade when held in position. No wounds has only 4 toes on lt foot. Plan: to workshop for aFO measurement, molding and eventual fitting when ready. Meanwhile maintain foot in cast. see with aFO fitted: seen …	AFO
144	2013-05-16	2013-05-22	2001-02-01	12.3083		M	lira	28							Equinus Lt foot in PIP					IM quinine gluteal injection			16/5/2013- severe equinus	16/5/2013- severe equinus lt foot result of gluteal im quinine injections	percutaneous achilles tendon lengthening		left	foot	schedule for triple arthrodesis or mid foot osteotomy Monday next week.		6/6/2013- plan: 1) discharge home. 2) r/v 1/12, hard inspection. 21/11/2013- the foot is well positioned. No equinus but still has foot drop. Plan: provide AFO. r/v after 3/12 with AFO.	AFO				2013-05-27	triple arthrodesis	4/7/2013- wounds healing fine. Foot pushed to neutral position. Plan short leg cast for 6 weeks after which FIT AFO. 21/11/2013- the foot is well positioned. No equinus but still has foot drop. Plan: provide aFO. Review after 3/12 with aFO.
145	2013-05-16	2013-05-22	2001-04-08	12.1222	18	M	lira	36							Pes equino varus Rt/PIP								16/5/2013- pes equinovarus supination	16/5/2013- pes equino varus supination rt in PIP. Equinus is not severe (can get to 90 degrees.) tibialis anterior power 0/5. peronei muscle.	percutaneous achilles tendon lengthening		right	foot	remanipulation in one week, then send home, will consider tendon transfer. After 6 to 12 weeks.		4/7/2013- foot in acceptable position, plan short leg walking cast for 6 weeks and fit AFO there after. 12/9/2013- pIP post achilles lengthening. Foot in plantegrade position, peroneals, extensors very weak, tibialis anterior 3/5. tibialis posteiror 5/5. plan tibialis posterior tendon transfer. schedule next holiday. work shop- mold and fit aFO day and night. review beginning of next holiday.	AFO
146	2011-07-07	2013-04-22	2003-01-01	10.3083	16	M	buikwe								PIP with equinovarus Lt								7/7/2011- equinovarus	7/7/2011- has severe equinovarus the foot is stiff. Dx:pip with equinovarus. Plan start M and C. review after 3 casts. 18/8/2011- plan: book for atl next Wednesday. Will benefit from tendon transfer after correction of equinus. 26/4/2012- has heel varus. plan: lets do STR on 9/5/2012. 7/6/2012- admit to ward today for possible surgery tomorrow. 26/7/2012-patient came off POP tday. plan: provide A…	mid-tarsal osteotomy; appropriate wedge osteotomies of calcaneocuboid and talonavicular joint, foot plantargrade and hind foot in neutral position.		left	foot	elevate, continue with cloxacillin		28/5/2013- foot in good position. Lets overlap the cast and fit with rubber tired. 9/7/2013- 6 weeks post midfoot osteotomy, wounds well healed and foot in good position. Recast and RTC in 6. meet for aFO molding and fit when ready. 22/8/2013- came off POp today. foot corrected. allow pt to bare weight. review in 4/52. 29/9/2016- the foot is in slight varus. plan: to use AFO at night. review him …	AFO
147	2013-06-05	2013-06-07	2007-01-01	6.43333	12	F	wakiso	15							PIP Lt foot	2011-01-01	4	2.42778	since 2011	gluteal injection		febrile illness	5/6/2013- equinovarus deformity	5/6/2013- c/o progressive deformity lt foot x 2.5 years. Proceeded by injection to into the lt gluteal area after febrile illness. Now noted the foot deformity outwards. ROS: NAD. LE: equinovarus deformity. Absent flexors and extension powers 0/5. iMP: pIP lt foot. Plan: for ATL on 7/6/213. admit for ward 6/6/13.	percutaneous achilles tendon lengthening		right	foot	maintian cast for 4 weeks. Elevate foot.		4/7/2013- pop is off today. 4/52 post ATL. Oe: still has hindfoot varus, cavus foot and varus forefoot. Plan: 1) do posterior ankle capsulotomy and intrinsic release at plantar fasciotomy on 8/7/2013. 2) admit on 7/7/2013. 9/7/2013- plan 1) get crutches and tyre, 2) RX per chart, 3) d/c home on analgesics and ABC's. RV in 4/52. 7/8/2013- pop was broken. still has a wound over incision site. a bit…	AFO			4/7/2013- 4/52 post atl. Oe: mss: varus hind foot and cavus mid foot lt. plan: 1) for intrinsic release and ankle posterior capsulotomy.	2013-07-08	calcaneal osteotomy and intrinsic release
148	2013-06-06	2013-06-12	2009-06-20	3.97778	10	M	kasese	16							Lt PIP with equinovarus	2010-01-01	0.530556	3.43056		gluteal injection			6/6/2013- left equinovarus foot	6/6/2013- 4 yo female with history of left foot deformity and weakness, noted at the age of 1 year and this has been progressively worsening. Mother reports a h/o of gluteal injection prior to onset of the weakness, no h/o any previous manipulations or surgeries, no h/o trauma. OE: good general condition afebrile. (JACCOLD) . locally: left equinovarus foot, weak TP and TA . imp: left foot pIP. pl…	percutaneous achilles tendon lengthening		left	foot	elevate limb, monitor circulation of the toes. Maintain cast for 6/52.
149	2013-06-12	2013-06-14	2008-09-25	4.71944		M	lira	17							PIP left foot	2010-01-01	1.26667	3.44722					13/6/2013- talipes equinovarus.	13/6/2013- history of injection 3 years ago, presents with deformed left foot. Clinically talipes equinovarus, tight achilles. Weak peroneal, extensors and tibialis anteriro, strong tibialis posterior good for transfer. Plan: achilles lengthening plus tibialis posterior tendon transfer single or staged.	percutaneous achilles tendon lengthening		left	foot	elevate the leg. For remanipulation next Friday, to do TPT in 3/12. patient to wait in hostel.		20/6/2013- remanipulation and if foot in good position discharge and review in 6 weeks for AFO fitting. 25/7/2013- off POP today, foot is well positioned. Plan: provide aFO. r/v after 3/12 with AFO. 21/11/2013- doing well on aFO. Still has mild foot drop. otherwise no equinus and very mild metatarsus adductus. plan: continue with ASFO. review after 6/12 for reassessment.	AFO
150	2013-06-18	2013-06-21	2007-10-20	5.66944	11	F	mubende	18							Rt PIP								18/6/2013- rt foot equinus deformity	18/6/2013- 5 year old girl, has been managed for right pIP, from mamutanda, has been undergoing serial casting for 3 times. Oe: good general condition, afebrile (JACCOUD). Locally: rt foot equinus deformity. Imp; right PIP. Plan; surgeon to r/v. equinus right foot. post m+ C x3 difficult to assess tendon function. dx: Right pip. plan :1) for ATL on 21/6/2013. admit 20/6/2013. 24/6/2013- no new co…	percutaneous achilles tendon lengthening		right	foot	discharge to namutamba today or tomorrow, readmit on Thursday for remanipulation Friday next week. Drugs as per med scheet.		18/6/2013- 5 yo has been managed for rt post injection paralysis. Has been undergoing serial casting. Equinus rt foot. Difficult to assess tendon function .dx: for ATL on 21/6/2013. plan: fo ATL on 21/6/13. admit 20/6/2013.
151	2013-06-20	2013-06-26	2003-05-01	10.1528	16	M	oyam	27							Equinus Rt. In PIP	2010-01-01	6.66667	3.46944				malaria treatment	20/6/2013- equinus rt foot	20/6/2013- equinus rt foot in pip with no muscle power in the peroneii muscles and the tibialis anterior and posterior muscles. Plan: for percutaneous ATL on 26/6/2013.	percutaneous achilles tendon lengthening		right	foot	elevate the limb. Monitor the circulation of the toes. POP cast for 4/52.		27/6/2013- plan: 1) get cruthces and tyres. 2) d/c r/v in 4/52. 1/8/2013- off POP today. Foot is well positioned. Plan: provide aFO. r/v after 6/52 with AFO for reassessment.	AFO
152	2013-07-09	2013-07-19	2006-01-01	7.55	13	F	busia	23							PIP Rt foot	2011-01-01	5	2.52222	since 2011					9/7/2013- c/o deformity rt foot x 2 years. The mother reports that it started with paralysis which was later followed by pain. Plan: start manipulation and casting. 18/7/2013- rt foot: flexible and equinus forefoot adduction and varus better. Plan: do percut aTL tomorow admit today.	percutaneous achilles tendon lengthening		right	foot	manipulation next Friday. Elevate the limb. Analgesics as per chart		26/7/2013- manipulation and casting done.30/1/2014- rt foot position is good. Still has stitches in situ. Plan: remove stitches. Give aFO use them day and night. r/v in 3/12. 13/5/2014- tolerating AFO well. Mild hindfoot varus. Toes plantar flexed afo straps not holding well. plan: workshop for afo strap adjustment. continue afo use. see in 3 months. 15/8/2014- right foot position good. still use…	AFO				2013-11-19	triple arthrodesis	30/1/2014- rt foot position is good. Still has stiches in situ. Plan: remove stitches give AFO use them day and night. r/v in 3/12. 13/5/2014- tolerating AFO well. Mild hindfoot varus. Toes plantarflexed aFO straps not holding well. Plan: workshop for aFO strap adjustment. continue AFO use. see in 3 months. 15/8/2014- rt foot position- good. still uses AFO day and night but there is no dorsiflexi…	23/2/2016- mobility trainign in parallel bars. Stepping up and down. ROM for the knee. Squatting.
153	2013-07-16	2013-08-07	2008-01-01	5.6	11	M	wakiso	15							PIP Rt. Foot deformity	2011-01-01	3	2.54167	since 2011	quinine iM gluteal injection		febrile illness	16/7/2013- supinated cavus and adducted foot with equinus deformity	16/7/2013- h/o progressive rt foot deformity x 2 years. Preceded by IM injection of quinine in gluteal region after a febrile illness. ROS: NAD. OE: limping gait, supinated cavus and adducted foot with equinus deformity. TPT function 3/5. imp: PIP rt foot deformity. plan: lets do aTL	percutaneous achilles tendon lengthening		right	foot	elevate the limb, rx as per drug chart, for remanipulation on 14/8/2013.		9/8/2013- no new complaints today. Plan: d/c home today. Provide tyres. Rt remanipulation on 14/8/13. readmit on 13/8/13. 14/8/2013- manipulate foot to 90 degrees, applied below knee pop. Plan: 1) maintain pop x 4/52. 2) r/v in 4/52 for AFO. 3) provide tyre before d/c. 15/8/2013- post remanipulation right foot. pop well tolerated. right foot- good position. plan: 1) give tyre. 2) d/c home POP x 4…	AFO
154	2013-08-09	2013-08-14	1996-06-15	17.1639	23	M	other	57							Rt PIP	2000-01-01	3.54444	13.6056					9/8/2013- equinus rt foot with carrus rigid	9/8/2013- deformity rt foot since age of 4 years. Secondary to weakness of rt lower limb sudden onset. ROS- normal. Clinically equinus rt foot with carrus rigid. No weakness in muscular function. Plan: 1) for ATL on 14/8/2013 but meanwhile do m+c (class 1).	percutaneous achilles tendon lengthening		right	foot	remanipulation in one week, next week Wednesday		21/8/2013- manipulation and casting done					2013-08-26	triple arthrodesis	1/11/2013- 9-10/52 of casting, post triple arthrodesis. Clinical union of arthrodesis site. Rt foot: plantegrade. Stitches still in situ. X ray rt foot. Arthrodesis site has united. Plan: continue crutches do rt bearing as tolerated r/v -6/52
155	2013-08-13	2013-08-16	2006-05-16	7.25	13	M	kampala	19							Lt PIP	2011-01-01	4.625	2.61667		gluteal injection			left foot deformity following gluteal injection 2 years ago. She has been progressively worsening. No other deformity and no hx of any previous manipulations or surgeries.		percutaneous achilles tendon lengthening		left	foot	elevate the limb, maintain POP for 4 weeks, treat as per chart		17/9/2013- POP cat removed today. Limb is plantagrade with slight fore foot adduction. Still has weak tibialis ant and posterior muscles. Plan: avail aFO. R/V in 4/12.	AFO			27/7/2017- the condition has recurred since the last visit, he now has a cavovarus foot with cruling of the toes. Plan: book for triple arthrodesis of the left foot.	2017-08-11	triple arthrodesis	22/8/2017- wound inspected and found fine, slight edema of the foot. Plan: for remanipulation and final casting in OPD. Review in 6 weeks. 5/10/2017- 30 kg. he is doing well, plan: stitch removal, avail an aFO, review with aFO. 12/10/2017- to use daytime AFO, review in 3 months. 13/4/2018- he is doing much better at the moment. has been using AFO for the past 3 months, o/e: has slight cavovarus o…	14/8/2017- seen patient from the department, trained ambulation NWB with a walker. Measured for crutches 43'. Trained ambulation with crutches, availed crutches, patient is stable with crutches.
156	2013-07-17	2013-08-21	1997-04-12	16.3583	22	M	mpigi								PIP Lt foot										triple arthrodesis		left	foot	elevate the limb. Rx as per drug chart. monitor circulation of the toes.		17/10/2013- 6 weeks of post triple arthrodesis (last remanipulation) has some tenderness over arthrodesis site. Stitches in situ. Plan: 1) remove stitches. 2) reapply POP for 3 weeks and bear weight on it. 7/11/2013- has some mild varus deformity lt foot. wounds has healed. non tender. plan: gradually wear off crutches. give aFO for day and night use. r/v 6/52 (19/12/13)	AFO
157	2013-08-20	2013-08-23	2008-01-01	5.64444	11	m	wakiso	18							Rt PIP										percutaneous achilles tendon lengthening		right	foot	elevate the limb, discharge hoe tomorrow. Provide tyre before discharge. Review in 4 weeks.		26/9/2013- rt foot still has some flexible forefoot adduction but foot is generally plantegrade. Tendons will be assessed later. Provide aFO in orthopaedic workshop then R/V.	AFO			24/4/2014- foot is slightly improving. Still has a forefoot adductus, midfoot curvus. TP tendon is active 3/5 power. He is using aFO. Plan: continue with aFO day and night. Review in holidays to plan TP ten don transfer. 16/6/2014- 6 weeks post tendon transfer. wounds healed. has some weak dorsiflexion. plan mold aFO, recast and fit when ready. review when fitted. 11/9/2014- doing well, weak TA/T…
158	2013-08-20	2013-08-23	2007-10-27	5.82222	11	M	wakiso	18							Rt PIP										percutaneous achilles tendon lengthening		right	foot			30/8/2013- manipulation and casting done. 27/9/2013- post ATL, doing well, plan: remove the cast. Measure for AFO. Review in 2 months. 21/2/2014- stil has some forefoot adduction. Active TAT. Afo has broken down. Plan: continue AFO use and foot exercises. repair aFO in workshop. r/v 23/5/2014.	AFO
159	2013-08-20	2013-08-23	2006-01-01	7.64444	13	F	iwengo	18							Rt PIP										percutaneous achilles tendon lengthening		right	foot	elevate the leg. Maintain pop for 1 moth. Review after 1 month.		PIP rt foot, cast is off today, good dorsiflexion. Still has weak TA and TP activity. Plan: avail aFO. Review in 4 months or in case of need. 16/1/2014- improving gradually. Still has a slight supination of the foot. Slight heel varus. TP active -3/5 power. plan: continue using aFO. review in 4/12. repair aFO.	AFO
160	2013-08-20	2013-08-23	2002-06-15	11.1889		M	congo	39							Right PIP					quinine IM gluteal injection				20/8/2013- right foot drop following a quinine injection on the buttock. Been using aFO. Clinically mild equinus and has mild supination and adduction but foot almost correctable to plantegrade position. Peroneals, extensors weak, good tibialis posterior but weak tibialis anterior. recommendation tibialis posterior tendon transfer.	TP tendon transfer. Transferred the insertion of the tibialis posterior tendon from medial to the dorsum of the foot.		right	foot	elevate the limb. Monitor circulation of the toes. Rx as per drug chart.		8/10/2013- right post posterior tibialis tendon transfer. Wound is fine, foot in very fair condition, plan mold and fit aFO. RTC 6 weeks. 21/1/2014- popst tendon transfer for PIP. Good results, foot in good position. Tendon working well. Fitted with aFO. plan- PT- strengthening exercises for transfered tibialis posterior. continue with AFO/ day and night.	AFO
161	2013-08-21	2013-08-26	2007-01-01	6.65278	12	F	wakiso	20							PIP Lt foot with equinus deformity	2008-01-01	1	5.63889					21/8/2013- moderate equinus of the fot	21/8/2013- lt foot deformity following an injection given at 1 year of age. OE: moderate equinus of the foot. Good activity in TA muscle . Varus of the hindfoot. Rx: atl + pop. Later on, re evaluation for possibel transfer of TA tendon.	percutaneous achilles tendon lengthening		left	foot	elevate the foot, monitor blood supply to the toes. POP for 25 days. Discharge tomorrow, provide crutches.		24/9/2013- off cast today. OE: foot good position. Plan: 1) to workshop for aFO measurement molding and later fitting. 2) meanwhile keep foot in cast. 3) review with aFO fitted.	AFO
162	2013-08-22	2013-08-26	2004-11-24	8.75556	14	F	Oyam	22							PIP Lt with equinus										percutaneous achilles tendon lengthening		left	foot	elevate the limb. Treat as per chart. Maintain POP for 4 weeks.		26/9/2013- lt foot is plantegrade. Flexible. Plan: avail AFO then R/V	AFO
163	2013-08-20	2013-08-26	2003-01-01	10.6528	16	M	mpigi	30							PIP Rt. Foot	2005-01-01	2	8.63611	since 2005	IM gluteal injection			20/8/2013- equinus deformity, hindfoot varus, and forefoot adductus	20/8/2013- h/o deformed rt foot x 8 years. Preceded by repeated IM gluteal injections then deformity progressed. No h/o surgical attempt before. ROS: NAD. OE: equinus deformity, hindfoot varus, and forefoot adductus. Strong TP (5/5) and TA(4/5) functions plan: for ATL on 26/8/13. admit 25/8/13 do Hb check. later he will need tendon transfer.	percutaneous achilles tendon lengthening		right	foot	elevate the limb. Maintain cast for 4 weeks. Treat as per chart.		24/9/2013- 4 weeks post aTL. OE: cast off foot plantegrade. Tibialis functions excellent. Plan:1) to workshop for aFO measurement molding then fitting. 2) recast foot. 3) see with aFO fitted. 27/9/2013- received an AFO today. Plan review in 1 month. 29/10/2013- no major complaints. OE: foot plantegrade. good dorsiflexion weak plantarflexion. plan: continue aFO. see in 8 weeks. 7/3/2017- pes equin…	AFO
164	2013-08-22	2013-08-30	2007-01-01	6.66389	12	M	lira	17							PIP Rt								equinus		percutaneous achilles tendon lengthening		right	foot	elevate the limb, treatment as per drug chart, monitor circulation of the toes. For remanipulation on Friday 6/9/2013.		21/11/2013- still has equinus though mild. Also foot drop. Plan: for mid foot osteotomy in jan/feb 2013. meanwhile provide AFO. 17/4/2014- off Pop 6/52 post mid tarsal osteotomy. Plan: review after 6/52 meanwhile he can ambulate and bear weight.	AFO				2014-02-25	mid tarsal osteotomy done	4/3/2014- manipulation and casting done.
165	2013-08-20	2013-08-30	1999-01-01	14.6639	20	m	wakiso	45							PIP Lt foot	2001-01-01	2	12.6361	since 2001.				20/8/2013- hindfoot varus with equinus	20/8/2013- h/o painful lt foot with deformity x 12 years. No any attempt on therapy before. Aggravated by twist of the foot 14 days ago while playing. OE: walks with a limp. Lt foot: hindfoot varus with equinus and arched tight plantar fascia and mild forefoot adduction. strong TP and TA tendon functions. imp: PIP lt foot. plan: lets attempt intrinsic releases (ATL/ plantar fasciotomy) + calcanea…	percutaneous achilles tendon lengthening		left	foot	elevate limb, analgesics, antibiotics, provide tyres and crutches, remanipuatlion next Friday 6/9/2013.		5/9/2013- had aTL and plantar fasciotomy on 30/8/2013. oE: pop was removed off in the clinic today! Foot still in equinus. Plan: re-admit today for remanipulation on 6/9/2013. 6/9/2013- manipulation and casting done. 3/10/2013- 4 weeks post ATL. OE: cast off today. foot good position. plan: 1) to workshop for AFO measurement and fitting when ready. 2) see with aFO fitted. 8/10/2013- AFO fitting w…	AFO
166	2013-08-27	2013-09-04	2008-01-01	5.675		F	wakiso	18							PIP Lt foot										percutaneous achilles tendon lengthening		right	ankle	elevate the limb. Analgesics as per rx chart. Keep cast for 4 weeks. Provide tyres.		3/10/2013- 4 weeks post ATL. Cast off today. Foot plantegrade. Plan: 1) to workshop for AFO measurement. 2) review with AFO fitted. 30/4/2018- had ATL done in 2013 and later used AFOs. Mother reports no change. Oe: foot flexible, has varus of the foot. plan: book for triple arthrodesis.	AFO				2013-08-17	triple arthrodesis	1/10/2014- triple arthrodesiss done 6/52 ago. The cast has been removed. The wound is healed. The foot is in slight eversion. Plan: remove stitches. Reapply the cast. To come again in 4/52 for cast removal and start of AFO. 1/11/2018- the wound Is healed. the foot is painless and plantigrade. plan: avail AFO. then review with the AFO.	20/8/2018- seen pt from opf, trained amublation with a walker then crutches NWB. Plan: to issued cruthces when money is ready.
167	2013-04-18	2013-09-04	2009-07-26	4.10556	9	F	kampala								PIP Lt foot	2011-01-01	1.43056	2.29722					equino varus deformity	18/4/2013- reviewed the pt she has lt PIP. The injection was given 2 years ago. 27/8/2013- lt PIP with foot in equino varus deformity. Tibialis posterior 4-5/5. TPT-0/5. plan: transfer of TPT on Wednesday 4/9/2013. admit 3/9/2013.	tp tendon transfer. Detached the whole of the tibialis posterior tendon and rerouted it from the level of musculotendenois junction to the cuboid anchored it using vicyrl 1 washed closed wound then applied below the knee pop with the foot in eversion		left	foot	monitor vital signs. Elevate the foot. treat as per chart. Keep POP x 6/52.
168	2013-07-10	2013-09-09	2007-01-01	6.68889		F	rakai	23							PIP Rt foot								10/7/2013- rigid equinus right foot	10/7/2013- right foot drop secondary to injection. Clinically rigid equinus right foot. Plan achilles lengthening and mid foot osteotomy. Will schedule once in holiday.	percutaneous achilles tendon lengthening		right	foot	elevate the limb. R as per drug chart. Monitor the toe circulation. For remanipulation and POP after 1/52		8/10/2013- residual equinus. Plan manipulation and casting. RTC 3 weeks. 17/10/2013- manipulation and casting. 27/11/2013- off Pop today, the foot is well positioned. Plan: provide AFO. Review after 6/52 with aFO. 15/1/2014- doing well on aFO (can't walk without aFO) has no power in the foot. plan: continue aFO. R/V after 1 year or earlier if problems. 14/1/2015- doing well on aFOs still has a fo…	AFO
169	2010-03-09	2013-09-09	2005-06-26	8.20278		F	kampala	22							Right PIP	2006-12-01	1.43056	3.27222		quinine gluteal injection		malaria treatment	9/3/010- pes varus supinatus cavus	9/3/2010- h/o malaria treated with quinine injection in the rt buttock when 6 months old. Following the injection she developed weakness in the rt lower limb. Oe: rt pes varus supinatus cavus. Tibialis anterior and tibialis posterior are both active. The peroneals have no power. plan: to review the child in 6 months to consider for tibialis anterior transfer or split tibialis posterior. 10/7/2013…	TA tendon transfer. Through anterior incisions transferred the insertion of the tibialis anterior tendon laterally to the lateral cuneiform bone.		right	foot	elevate the limb. Rx as per drug chart. Monitor circulation of the toes. Discharge when comfortable on POP for 6/52.	23/10/2013- 6/52 post tendon transfer. Off POP today. The wound have healed. The foot is in good position. Plan: remove stitches. Provide AFO with foot in neutral position. Review after 4/52 with aFO. 27/11/2013- walks well without a foot drop but has a heel varus. plan: discontinue the AFO. review after 3/12.		AFO
170	2013-09-05	2013-09-11	2009-01-01	4.69444	10	F	kampala	12							Rt PIP										manipulation and casting		right	foot	elevate the limb, analgesia as per RX chart. Discharge this afternoon. Review in OPD next Thursday: cast removal and manipulation and casting again.		10/10/2013- off the cast today, doing well. Weak TP and TA tendons. Plan: avail AFO review in 4 months. 11/2/2014- using aFO well . aFO is pressing on his 1st metatarsal plan: continue AFO for 4/12. readjust AFO. r/v in 4/12. 18/7/2014- 2 weeks post recasting cast off today. oe: foot mild hindfoot vvarus and forefoot adductus. plan: manipulation and casting. keep cast for 4 weeks then review for …	AFO
171	2013-05-07	2013-09-12	2005-01-01	8.69722	14	F	wakiso	23							PIP Lt foot	2006-01-01	1	7.35	immediately					7/5/2013- c/o lt ankle deformity x 7 years. Was injected at 1 year. 16/5/2013- has got aFOs for day use and SFABs for night. 5/9/2013- has hind foot varus and forefoot adduction. Both TAT and TPT are active 5/5. plan: 1) for TPT transfer on 11/9/13. 2) admit 10/9/13.	TP tendon transfer. Detached the whole of the tibialis posterior from its insertion and rerouted it through the interosserous membrane to the cuboid. Anchored the tendon using sorb 1 cleaned wound closed, dressed then applied b/k pop.		left	foot	monitor vital signs. Elevate foot and monitor toes capillary refill. Treat as per chart. Keep POP x 6/52.		24/10/2013- POP was removed today. Rt foot mildly inverted. Still has stitches in situ. Transferred tendon: 3/5. plan: 1) remove stitches. 2) give afo. 3) r/v/ 1/12	AFO				2016-04-04	triple arthrodesis	10/4/2016- off pOP today 5/52 post tripel arthrodesis. The wound is almost healed. Plan: remove stithces. Reapply a POP walking cast. Review after 4/52 for cast removal. 7/6/2016- off POP today, the foot is well positioned. Plan: review after 4/52 to assess the gait. 15/6/2016- complaint of on and off swelling plus pain around the ankle. there is a mild heel varus and adductus. plan: NSAIDS. prov…	12/4/2016- ambulated and gait trained NWB with crutches
172	2013-09-10	2013-09-16	2010-01-01	3.70833	9	M	iganga	11.2							Rt PIP										achilles tendon lengthening		right	ankle	monitor toes for pallor. Analgesia as per chart. For aFO after 2 weeks			AFO
173	2013-09-18	2013-09-20	1997-01-01	16.7194	22	F	luwero	35							PIP Lt foot								18/9/2013- equinus of lt foot	18/9/2013- was injected at a very young age and developed pip, has been unabel to use the limb appropriately. Now has developed an equinus of the lt foot. OE: lt lower limb is wasted. Equinus of the ankle joint. Plan x-ray of the lt ankle jt. Fot ATL and castign on 20/9/2013	percutaneous achilles tendon lengthening		left	ankle	elevate the limb, analgesics as per rx chart, book for mid-foot osteotomy next Wednesday		2/10/2013- manipulation and casting done.					2014-03-31	mid tarsal osteotomy	27/5/2014- pOP off today. Surgical scar is dry (removed stitches today). Foot plantegrade, good axis of the hind foot, no cavus. Rx: refer to o/w for aFO (to be worn x 2/12) clinical control x 2/12
174	2013-09-24	2013-09-27	2011-01-01	2.73889	8	M	Mbarara	13							Rt PIP										percutaneous achilles tendon lengthening		right	ankle	elevate the limb. Antibitoics and analgesic as per rx chart. Daily wound dressing. Cast for 6 weeks
175	2013-09-26	2013-10-02	2006-01-01	7.75278	13	F	wakiso	19							Rt PIP									18/10/2013- left pIP attempted achilles lengthening failed. Book for mid foot osteotomy Wednesday.	percutaneous achilles tendon lengthening		right	ankle	elevate the limb. Analgesics as per Rx chart. Review with rt foot x ray and book for midfoot osteotomy in 2 weeks.		21/11/2013- foot is doing well. Plantegrade with rt dorsiflexion. Still goes into varus plan: avail AFO. r/v with afo. r/v in 1/12. 17/12/2013- doing well on aFO. Plan: r/v in 4/12. 18/9/2014- has recurrence of equinus rt foot. Plan: for percutaneous ATL on 23/9/2014. 27/10/2014- been underoing re casting for a recurrency POP off today. has a mild varus flexible. plan: give new aFO, if not ready.…	AFO	24/9/2014- trained ambulation using axillary crutches.
176	2013-09-18	2013-10-08	2001-01-01	12.7694	18	F	kampala	50															18/9/2013- equinovarus	18/9/2013- was injected at a tender age and developed weakness in the rt foot. Now has developed equino varus of the rt fot. Tenderness on manipulation. Plan x ray rt foot. X ray shows arthritis of the ankle joint. For serial castings to correct the equinovarus. analgesia- tab brufen 400 mg tds 1 week. rv: 1 week for remanipulation. 3/10/2013- off the cast today, foot is still in equinovarus. pla…					elevate right foot. Monitor distal toe circulation. Treat as per treatment chart.		16/10/2013 and 23/10/2013- manipulation and casting done
177	2013-10-08	2013-10-16	2007-01-01	6.79167	12	F	kiboga	15							PIP Rt foot								8/10/2013- equinovarus lateral callosities	8/10/2013- PIP rt foot, walks with equinovarus, lateral callosities, plan: below knee POP for 1 week. Then admit for ATL or the right foot on Wednesday 16/10. then afo later.	manipulation and casting		right	foot	provide shoe tire. Discharge home when comfortable. Return in 6 weeks for cast removal. Mold for aFO, recast and fit when ready.		26/11/2013- foot in good position, plantegrade. Plan take a mold for AFO, recast and fit when ready. Review child after fitting. 13/2/2014- patient is doing well. The aFO is still fitting but has lost one strap. Still has weakness of the TP and TA muscles. plan: readjust the AFO. review in 4/12.	AFO
178	2014-10-14	2013-10-16	2009-01-01	4.79167	10	M	luwero	17							PIP Rt foot	2011-01-01	2	3.78611		quinine				14/10/2013- quinine injection 2 years ago. Now has abnormal gait. Clinically left pIP. Tibialis posterior strong. Achilles tight. Plan: tibialis posterior tendon transfer and achilles lengthening.	achilles tendon lengthening		right	foot	monitor vital signs. Elevate the foot. Treat as per chart. Keep POP x 6/52.		28/11/2013- removed Pop today. Lt foot well corrected and transferred tendon- active plan: take off negative cast for aFO then re-apply pop. r/v with aFO. 6/12/2013- foot doing well. Position is good. Transferred tendon power is 4/5. AFO has no hinge at ankle foot. plan: ortho workshop to adjust afo (give hinge). use AFO day and night x 3/12 with foot exercises. r/v in 3/12	AFO
179	2013-10-17	2013-10-18	2010-12-06	2.86667	8	M	buvuma								PIP Rt foot	2011-11-01	0.902778	1.96111		quinine		malaria treatment	17/102013- equinus in the left foot	17/10/2013- a 4 yo presents with left foot eformity, mother reports the child was well till the age of 11 months when he was given injection quinine following a malaria attack, she further reports h/p convulsions at the time of attack. Mother says after a non specified period of time the left nee joint started getting contracture but was advised to do stretching exercise. mother also says the chi…	manipulation and casting		right	foot	elevate the limb. Analgesics as per rx chart, cast for 4 weeks the aFO.			AFO
180	2013-09-18	2013-10-08	2001-01-01	12.7694	18	F	kampala	50							Pes equinovarus Rt PIP								18/9/2013- equinovarus	18/9/2013- was injected at a tender age and developed weakness in the rt foot. Now has developed equino varus of the rt foot. Tenderness on manipulation. Plan x ray rt foot. X ray shows arthritis of the ankle joint. For serial castings to correct the equinovarus, analgesia tab brufen 400 mg tds 1 week. rv 1 week for remanipulation. 3/10/2013- off the cast today, foot is still in equinovarus, plan…	TA tendon transfer. Transferred the insertion of the tibialis anteriro tendon laterally to the lateral cuneiform bone. Incisions closed and dressed. Tourniquet deflated and a below knee POP cast applied with the foot in neutral position.		right	foot	elevate right foot. Monitor distal toe circulation. Treat as per treatment chart.
181	2013-10-21	2013-11-06	2009-05-02	4.51111	10	M	Jinja	15							Rt PIP										percutaneous achilles tendon lengthening		right	foot	elevate the foot. For remanipulation on 13/11/13.		10/12/2013- cast off today, foot well corrected. Plan: measure aFO, to wear AFO during day. r/v in 4/12. 10/4/2014- has got good TA and TP tendon strength. Slight foot drop. Plan: continue using AFO. r/v in 4/12 to plan TP tendon transfer. 7/8/2014- doing well, slight foot drop, TP tendon function is good 4/5, peroneal tendons are ok. 5/5 plan: continue with AFO for 4 months. repair AFO, will con…	AFO			13/11/2014- rt pip has a very active TA and TP. Has forefoot adduction, cavus and semi rigid foot. Plan: for TA transfer on 3/12/14, but R?V and admit on 2/12/14	2014-12-03	achilles tenotomy done	3/2/2015- fair position, mild equinus, plan repar and use Afo day and night. 7/4/2015- he is tolerating AFO well. AFO spolited. Has mild forefoot adductus and mild equinus deformity but flexible foot. Plan: afo repair. Continue AFO use fulltime. See in 3 months.			14/7/2015- today: foot better, flexible and in good position. Continue with aFO use for night bracing x 3/12.	2015-10-30	TP tendon transfer of tibialis posterior	15/1/2015- 6 weeks post TAT rt foot. Oe: cast off wound raw some areas foot good position. Plan: change dressing. Ampiclox 500 mg tds x5 days. Workshop for aFO. See with aFO fitted. 9/2/2016- foot good position and plantegrade. The hallucis flxed. AFO spolited. plan: use of aFO at night time only. orthopaedic workshop for aFO repair. see in 3 months. 3/5/2016- doing well. he walks quite well with…	3/5/2016- seen patient and taught to do active dorsiflexion exs lt foot. Continue with exs daily at home.
182	2013-09-12	2013-11-06	2003-07-23	10.2861	15	M	wakiso								PIP Rt	2009-01-01	5.43889	4.69722		IM gluteal injection				22/12/2009- a case of pIP with foot drop. Plan: for ATL then aFO next year. 25/3/2010- reviewed patient with drop foot rt had gluteal IM injection 1 year ago. No tendon transfer. Foot neural. Plan: take measurement for aFO. 21/6/2011- defaulted an aFO-never received. rt foot in equinus. plan: for perc aTL then aFO. 12/7/2011- admit to ward for remanipulationt omorrow. 11/8/2011- off POP today. pl…	triple arthrodesis		right	foot	elevate. Drugs as per medicine sheet. Splint the cast prn. Cast change next week Wednesday.		9/1/2014- 2/12 post triple arthrodesis right foot. Off Pop today. Plan: review after 4/52 to assess the gait and the foot. 6/2/2014- he is doing well. Foot is plantegrade, flexible, food axis of hind foot. Plan: to see in november for clinical control. 25/11/2014- rt foot position- plantegrade. walks with a foot drop, no dorsiflexion. plan: r/v 6/12. continue rt foot exercises. 26/5/2015- foot dr…
183	2013-06-20	2013-11-14	2006-01-01	7.86944	13	M	kampala								PIP with ulcer								20/6/2013- equinus	20/6/2013- left foot PIP with big septic ulcer on the dorsum, no motor function at the ankle/foot. Good knee flexion and extension. Rigid equinus. Spine and hips fine. Nutritionally challenged. Plan nutrition, dressing change, if ulcer heals then do achilles lengthening. return to clinic in 1 week. 11/11/2013- PIP left foot with ulcer which has already healed. plan achilles lengthening and perc p…	achilles tendon lengthening		left	foot	may discharge home and readmit next Wednesday for another manipulation under anaesthesia.		27/11/2013- manipulation and casting. 23/4/2014- has missed follow up visits severally. AFO totally destroyed. Has recurrence of carus/ equinus though still. Plan: to workshop for new AFO. Recast the foot today. See with aFO to review in 1/12. 10/9/2015- he has PIP and has been on the aFO which has now been destroyed. clinically: the foot is in cavovarus, foot can be manipulated to plantegrade. p…	AFO
184	2013-11-15	2013-11-20	2003-01-01	10.8861	16	F	iganga	21							Rt PIP	2004-01-01	1	9.87222		IM injection		febrile illness	15/11/2013- equinus with varus deformity	15/11/2013- was born normal. At 1 yr- had an IM for a febrile illness that lef to paralysis of rt ll that eventually led to deformity of rt foot. ROS: normal. Clinically- rt foot equinus with varus deformity flexible and tight tendoachilles. TAT-active. plan: for M+C then percutaneous ATL on wednesday (20/11/13). admit 19/11/2013.	achilles tendon lengthening		right	foot	remanipulation next Wednesday. Analgesics as per chart		7/1/2014- rt foot still has mild forefoot adduction but its flexible. POP was removed today. Plan: give AFO then review. Replace POP if AFO not ready.	AFO
185	2013-11-20	2013-11-21	2001-11-07	12.0389	17	M	karagwe	39							PIP Lt foot	2006-01-01	4.15	7.88611	2006-2013	IM injection gluteal			20/11/2013- equinovarus foot with supination	20/11/2013- h/o progressive lt foot deforimty x 7 years. Preceded by Im injection into the lt gluteal muscles. Progressively the lt foot deformed and weakened and now walks with outer border of foot and a limp. No previous surgical attempt. Oe: equinovarus foot with supination. imp: lt PIP foot. plan: for ATL on 21/11/2013. admit 20/11/2013.	percutaneous achilles tendon lengthening		left	foot	provide tyre shoe and crutches. Drugs as per medicine sheet		6/1/2014- 6 wees post atl. Oe: pop cast off today. Foot plantegrade. Absent TP and TA muscle functions. Plan: to worshop for afo measurement, molding and fitting. Meanwhile re cast foot. See with AFO fitted.	AFO				2014-05-21	triple arthrodesis	28/5/2014- off pop today 1/52 post triple arthrodesis. the wound is clean but not yet healted. plan: reapply POP cast. review after 6/52 for pop removal. 9/7/2014- 12 post tripel arthrodesis lt foot. cast off today small part of wound remaining over suture line. foot in good position. plan: remove sutures. daily wound care. start aFO use full time. see in 8 weeks for clinical control.
186	2013-11-14	2013-11-25	2008-01-01	5.9	11	M	iganga	24							PIP with ulcer										triple arthrodesis		left	foot	elevate limb. Wound inspection after 2 weeks and change of POP. Antibiotics and analgesia as per treatment chart.		10/12/2013- wound inspection and dressing done. 17/12/2013- manipulation and casting done. 8/1/2014- 6 weeks post tripel arthrodesis lt foot. Oe: cast off. Wound healing small area of infection. Foot plnategrade. Plan: to workshop for aFO. Remove stitches and re apply cast with window. admit to hostel as await aFO fitting.	AFO
187	2013-11-26	2013-12-02	2003-12-11	9.975	15	M	kampala	26							PIP Rt foot	2007-01-01	3.05556	6.90278	since 2007	gluteal IM injection			26/11/2013- equinus	26/11/2013- c/o: progressive deformity of the left foot x 6 years. HPC: deformity preceded by IM injection into the left gluteal region, he developed pain, weakness and deformity in the lt lower limb from kasanagati HC. H/x of bracing from katalemwa. No hx of surgeries. oe: lt lower limb smaller than RT. he walks with the lt limb on the lateral border of the lt foot. foot is in equinus and invert…	percutaneous achilles tendon lengthening		right	foot	elevate left lower limb. Monitor toe circulation. Remanipulation on 9/12/13		11/12/2013 and 18/12/2013- manipulation and casting done. 9/1/2014- lt foot pop is off today. Well correced, flexible. Plan: give AFO then R/V.	AFO
188	2013-10-08	2013-12-02	2003-07-28	10.3444	15	m	mukono	28							PIP rt foot								8/10/2013- hind foot varus, cavus	8/10/2013- pip right foot. Tibialis posterior tendon transfer done. Foot still supinated, hind foot varus, cavus, transferred tendon working but weak. Plan: calcaneal osteotomy, plantar fasciotoomy, and tibialis posterior tendon advancement. Will schedule in holiday. 27/11/2013- pip rt foot no majro complaints. has come to book for surgery. OE: hindfoot varus, forefoot adduction, weak TP function…	percutaneous achilles tendon lengthening		left	foot	rx per chart. For wound check and cast change next week		7/1/2014- doing well, cast is off. Plan: below knee pop cast x 1/52. measure for AFO. AFO for 5/52 and r/v after 5/52.	AFO
189	2013-07-18	2011-01-28	2004-01-01	7.075	15	F	wakiso								PIP Rt foot								varus equinus	2/12/2010- h/o iM injection c/o defomed rt foot. Clinically rt foot inverted and varus equinus. TP power 5. TA power 0. plan: review 20/1/2011 to schedule for ATL (1sdt stage) and TP tendon transfer. 20/1/2011- admit on 27/1/2011 for surgery on 28/1/2011.	tibialis posteiror transfer. Mad e a longitudinal lateral incision to expose the calceneocuboidal and talonavicular joints. Exposed subtalar joint. Appropriate wedge osteotomies done to achieve plantargrade position. Packed with spongy bone.		right	foot	wound check and cast change on 9/12/2013. rx per chart.		3/3/2011- slightly over 4/52 post tendon transfer. Plan: reapply POP for 2/52 more. r/v after 2/52. 17/3/2011- just off POP. Plan: remove stitches. Afo. r/v after 4 weeks. 14/4/2011- transferred tendon not active. Plan: start pT to stimualte the tendon. review in 3/52. 5/5/2011- tendon not active. plan: PT please. review in 6/52. 16/6/2011- no new complaints, the gait has improved. no more drop f…	AFO			28/11/2013- still has equinovarus deformity was scheduled for tripel arthrodesis. Plan: for triple arthrodesis on 2/12/213.	2013-12-02	triple arthrodesis	6/1/2014- 6 weeks post triple arthrodesis rt foot due to PIP. Oe: cast off today. Wound healing well. Plan to workshop for aFO measurement, molding and later fitting. Remove stitches and re cast foot. See with aFO fitted.
190	2013-11-28	2013-12-02	1996-05-25	17.5194	23	F	tororo	44							Rt PIP										percutaneous achilles tendon lengthening		left	foot	for remanipulation on 9/12/13. elevate foot.						3/1/2014- booked for tripel arthrodesis on 7/1/2014	2014-01-07	triple arthrodesis	28/2/2014- post triple arthrodesis lt foot-plantegrade mild forefoot adduction. Plan: measure for AFO, for day and night. r/v 1/12 (28/3/14) with new x ray lt foot. 28/4/2014- post triple, c/o pain when she walks. Plan: lets fit the afo with a sole to enable. he walks well. review in 2/52. 31/7/2014- doing well. no pain. plan: review in 3 months. 15/12/2014- no pain, foot is still plantegrade. pl…
191	2013-01-17	2013-12-09	1997-01-01	16.9389		F	wakiso								PIP Lt foot								3/12/2013- equinus, hindfoot varus and supination of foot	23/5/2013- reports painful rt foot following a twist 2/12 ago. Pain especially while walking. 3/12/2013- h/o recurrent deformity of the rt foot after TPT 12 years ago. Has come to book for surgery: triple arthrodesis and plantar fusion. Oe: equinus deformity, hindfoot varus and supination of foot. plan: for triple arthrodesis and plantar fusion on 9/12/2013. admit on 8/12/13.	triple arthrodesis		left	foot	elevate the limb and monitor for any limb swelling. Analgesics and antibiotics. Wound inspection and remanipulation next Monday 16/12/2013.		16/12/2013- one week post triple arthrodesis. Cast ok toes pin. Plan analgesics and RTC 13/1/2014. 13/1/2014- 4 weeks post triple. Remove cast. 12/2/2014- fell off yesterday on the oeprated leg. Now has mild pain. OE: rt foot in a cast fitting well but at the heel it is soft. x-ray: no fractures seen ankle mortise normal. plan: reinforce the cast. see in 2 weeks as per schedule. 24/2/2014- doing …	AFO
192	2013-09-30	2013-12-09	2002-11-24	11.0417											PIP Lt foot									3/12/2013- lt pip post tendon transfer. Has got a high riding medial arch. The toes are flexed. Has good dorsiflexion. Plan: mid foot lt osteotomy and fusion on Friday.	mid tarsal osteotomy; using a vertical lateral incision, exposed the mid foot joints, ostetomized them to remove cartilage and correct deformity, did plantar fasciotomy, lavaged wound and closed in layers. Maintained the foot in a below knee cast.		left	foot	elevate the left foot. Treat as per treatment chart		22/1/2014- 6/52 post surgery (mid tarsal osteotomy) lt foot. No complaints. pOP is weak on the plantar side. Plan: reinforce/ replace the cast for another 4/52. review after 4/52 for cast removal. Replace crutches with one elbow crutch. 19/2/2014- off POP today. wound clean and dry. plan: remove stitches. provide aFO. 19/5/2014- mid foot osteotomy dec 2013. foot plantegrade AFO broken. plan works…	AFO
193	2013-05-23	2013-12-10	2005-05-27	8.53611	14	M	wakiso	39	163.2						PIP Lt foot								19/5/2011- plantegrade foot	19/5/2011- child is wearing an AFO, day time. The foot is plantegrade, it can go just beyond neutral, no fixed deformity. No muscular activity. DX: PIP lt foot. Plan: AFO during the day time. To see when needed. 21/8/2012- there is inversion and moderate equinism of the foot. he walks quite well with AFo and shoe. plan: yearly control. later on, in 3-4 years, triple arthrodesis. 23/5/2013- still …	triple arthrodesis		left	ankle	elevate the limb, monitor circulation of the toes. Treat as per drug chart. For wound inspection and cast change on 17/12/13		30/1/2014- lt foot plantegrade. Stil has stitches in situ. Plan: remove stitches. Use AFO day and night. Wean off crutches, r/v/ afer 3/12. 24/4/2014- he is outgrowing the Afo but has some varus deformity. Walks with a foot drop without Afo. Plan: wean off afo. may need mroe surgery to the left foot later. r/v/ in 3/12. 24/7/2014- mother reports that he is improving gradually , however, the equin…	AFO				2017-01-11	triple arthrodesis done	17/1/2017- doing well. No complaints. The POP is well tolerated 1/52 after triple arthrodesis. Plan: for wound inspection and final cast application. Review after 6/52 for cast removal and check xray. 28/2/2017- wound looks clean. Foot fused on x rays. plan: pin and stitch removal. avail an AFO. review with teh AFO. 1/3/2017- seen patient with AFOs. plan: taught mother how to use AFOs. full time …	12/1/2017- seen one post op on below knee pop lt lower limb. Has out grown crutches. Provided with new crutches and trained ambulation NWB lt lower limb. He is very stable with crutches.
194	2013-12-10	2014-01-03	1998-01-01	16.0056	21	F	kumi	40							PIP right foot								10/12/2013- rigid cavovarus right foot	10/12/2013- pip. Has had two surgeries so far. Clinically: rigid cavovarus right foot. Will need calcaneal osteotomy intrinsic release.	triple arthrodesis		right	ankle	elevate the limb. Treat as per drug chart. For wound inspection and POP on 10/1/2014.		18/2/2014- doing well. Wounds have healed well. Plan: measured aFO. Use AFO for 4/12 during the day. Continue 1/12.	AFO
195	2013-12-16	2014-01-03	2000-08-10	13.3972	18	M	wakiso	49							PIP Rt foot									16/12/2013- PIP right foot, extensor and peroneals weak, tibialis posteiror 5/5. flexors working fine. Recommendation tibialis posterior tendontransfer.	percutaneous achilles tendon lengthening		right	ankle	elevate the limb, monitor circulation of the toes. Treat as per drug chart. Pop for 4/52.		4/2/2014- post achilles lengthening. Foot plantegrade but has slapping gait with strong tibialis posterior. Plan AFO. Schedule for tendon transfer during holidays. 26/11/2014- booked for surgery on 2/12/214. 16/12/2014- doing well. 2/52 of casting. wounds have healed. plan: remove stitches only but not button. re apply POP x 4/52. review 13/1/15 or POp removal then aFO. a below knee POP cast appl…	AFO	3/12/2014- ambulation training done NWB lt lower limb.
196	2010-06-15	2014-01-06	2003-01-01	11.0139	16	F	wakiso								PIP Lt foot								heel varus	15/6/2010- h/o post injection resulting into deformity rt foot. Plan: for ATL. Reiew in 2/52. 29/6/2010- pip rt foot drop. Has no active muscle groups to the foot and no equnus. The foot is plantegrade. Plan: for afo. Review with afo. 15/7/2010- reviwed with AFO. plan: review after 6/12. 8/2/2011- doing well on aFO, has slight heel varus. plan: review in 1 year for possible triple arthrodesis. 29…	triple arthrodesis		left	foot	elevate the right foot. Treat as per treatment chart. Wound inspection and remanipulation on 13/1/2014.		20/2/2014- POP off today. The foot is in good condition. Surgical wound is ok. Rx: remove stitches. Apply POP for weight bearing for 4/52. to see in 4/52 for POP removal and control. 20/3/2014- off POP today. The wound has healed. Plan: can start bearing weight as tolerated. r/v after 4/52 to assess the giat. 24/4/2014- foot is plategrade with mild hind foot varus. has wound over surgery site. us…	AFO
197	2013-12-18	2014-01-07	2003-05-17	10.6389	16	M	kampala	38							PIP Lt foot								18/12/2013- equinovarus supinatus	18/12/2013- boy with PIP of the left foot has been managed with splints and surgery once in mengo. Oe: pes equiovarus supinatus with power zero of the tibialis anterior and peroneii muscles and tibialis posterior muscle power 3-4. plan: percutaneous ATL as 1st stage then tripl3 arthrodesis later.	triple arthrodesis		left	foot	elevate left elg. Monitor toe circulation. For remanipulation on 15/1/2014.		10/2/2014- post achilles lengthening. Foot still supinated and adducted. Plan remanipulation and casting for 4 weeks and on return take negative cast for AFO and fit when ready. 10/3/2014- pip post achilles lengthening. Foot bracable. Plan mold aFO, recast and fit when ready.	AFO
198	2013-12-05	2014-01-08	1997-11-02	16.1833		M	kampala	53							PIP Lt foot										triple arthrodesis		left	foot	elevate the limb. Monitor toes for palor. For remanipulation in 1 week.		27/2/2014- doing well, foot in good axis. Still has some wounds over the incision site. Plan: stitch removal today. Measure aFO, if not ready, reapply cast. r/v with aFO. Afo x 3/12. 29/5/2014- doing well. Foot in good axis. Still has some wounds over the incision site. plan: stitch removal today. measure AFO if not ready re apply cast. wear x 3/12. review with aFO.	AFO
199	2013-10-17	2014-01-08	1999-06-06	14.5889	20	F	wakiso	57							PIP Lt foot									10/12/2013- lt pip for surgery. Plan: for ATL on 8/1/2014.	percutaneous achilles tendon lengthening		left	foot	analg as per chart. For tripel arthrodesis next week Tuesday.		15/1/2014- manipulation and casting.					2014-01-22	triple arthrodesis					2014-01-29	percutaneous ATL	5/3/2014- post triple arthrodesis. Has pain of the lateral two toes that are pressed by the cast. Plan let's change the cast today. Review after 4/52 for POP removal. 17/4/2014- off cast today, limb looks in correction. Plan: measure for an AFO. Review with an AFO. 26/5/2014- doing well. plan: r/v in 3/12 as planned earlier. 20/6/2014- has an ulcer over the right tendon chilles with good granulat…
200	2014-01-08	2014-01-10	2006-01-01	8.025	13	M	iganga	18							PIP Lt foot	2013-01-01	7	1.01944	since june 2013.	gluteal IM injection		febrile illness	8/1/2014- equinus foot	8/1/2014- c/o progressive deformity of the lt foot x 6 months. Had iM injection lt gluteal region after febrile illness. Developed pain and weakness later. Oe: walks on lateral border of foot. Equinus foot. Weak TP/TA functions. Imp: PIP lt foot. Plan: for percutaneous ATL on 10/1/2014. admit on 9/1/2014.	percutaneous achilles tendon lengthening		left	foot	treatment as per chart. Discharge tomorrow. To maintain cast for 4 weeks.		10/2/2014- four weeks post achilles lengthening. Foot in good position. Plan take mold for AFO, recast for 4 weeks and then fit aFO which should be ready by then. 25/2/2014- PIP, post achilles lengthening. Not a candidate for tendon transfer- no functional tendons. hindfoot in varus, forefoot supinated and walks on lateral border. recommendation continue with aFO, will consider triple arthrodesis…	AFO
201	2013-12-06	2014-01-13	2001-04-22	12.725		M	kampala	38							PIP Rt foot										manipulation and casting		right	foot	monitor distal toe circulation, elevate left leg, treat as per treatment chart, for wound inspection and remanipulation on 20/1/2014.		20/1/2014- manipulation and casting. 7/4/2014- 2.5 months post triple, woudn healed, stitches situ. Foot- hindfoot vams but plantegrade. Plan removal of stitches measure and avail aFO, fit when ready, weight bearing as tolerated review-- 6 weeks. Might consider repeat surgery to collect hind foot vams.	AFO
202	2013-12-10	2014-01-15	2006-01-28	7.96389	13	m	kampala	25							PIP Rt foot								10/12/2013- slight equinus and varus of the rt foot	10/12/2013- he was injected and sustained rt PIP with foot drop and the child is now walking with a slight equinus and varus of the rt foot. OE: has got some slight power of the TA and TP tendon 2/5. callocity of the right foot. Plan: continue physio. admit mid January for TA tendon transfer. R/V on 7/1/14. 8/1/2014- rt foot pip has come for booking. OE: callosity lateral border. lateral head tal…	TP tendon transfer. Performed a percutaneous ATL to achieve dorsiflexion, medial incision to expose TP tendon, harvested tendon and exposed it via a medial incision made on the tibia, made a lateral incision over the cuboid and made a tunnel for the tendon. tracked the TP tendon through the interosseous membrane, superior retinaculum and delivered it at the incision site, buried the tendon and se…		right	foot	abx and analg as per chart. Elevate the limb.		27/2/2014- cast is off today, doing well, able to dorsiflex the foot quite well. Plan: lets measure an AFO. r/v with AFO.	AFO
203	2013-12-12	2014-01-17	2002-02-10	11.9361	17	M	mukono	30							Rt PIP										mid-tarsal osteotomy. Through lateral incision to the mid foot resected the talonavicular joint and the calcaneocuboid joints to correct the mid-foot cavus.		right	foot	elevate the limb. Treat as per drug chart. Monitor the circulation of the toes. For wound inspection and POP change on 31/1/2014.		17/3/2014- 2 weeks post midtarsal osteotomy. Wound healing fine. Foot plantegrade. Plan recast for 4 weeks and on return mold and fit AFO. 22/4/2014- post midfoot osteotomy. Wounds healing fine. Hindfoot in significant varus. Will need subtalar osteotomy/ triple arthrodesis later. meanwhile FIT AFO. 30/4/2014- reviewed with AFO which fits well. plan: full time aFO donning. foot exercises intermit…	AFO			2/7/2014- post mid foot osteotomy rt foot. Tolerating AFO well. OE: has hindfoot varus. Plan: will need calcaneal osteotomy during november 2014 holiday. Replace strapping of the AFO and continue its use. 20th novermber 2014. has a hind foot varus. Plan: for calcaneal osteotomy tomorrow.	2014-11-21	shortening of lateral column done	13/1/2015- foot acceptable position. 10/2/2015- doing well, foto well corrected. Plan: to sue AFO during the day for 4 months. Review in 4 months. 23/4/2015- doing much better, plan: review in 6 months. To use AFO at night. 10/12/2015- he is doing well, there is still low power in the TP/TA tendons. plan: continue night time aFOs. review him in 6 months. 2/6/2016- patient treated for rt pip, has …
204	2014-01-14	2014-01-17	2000-12-25	13.0611	18	F	amuria	29							PIP Lt foot	2004-01-01	3.01667	10.0361	since 2004	gluteal iM injection			14/1/2014- foot supinatus and hindfoot varus	14/1/2014- c/o recurrent lt foot deformity x 10 years. Preceded by repeated IM injection both gluteus. Progressively developed weakness lt leg. Had surgery done in arua hospital in Nov. 2011. but deformity persisted now walks with pain. Also notes that rt foot abnormality. oE: surgical scar suggestive post TPT lt foot. foot supinatus and hindfoot varus. rt foot rocker-bottom deformity. get X ray …	triple arthrodesis		left	foot	elevate the limb. Treat as per drug chart. Monitor the toe circulation. For wound inspection and cast change on 31/1/2014.		6/3/2014- 6/52 casting completed. Pop removed today. Wound has healed but stil has some stitches in situ. Plan: do xray lt foot- talo navicular subtalar feets have fused. Calcaneo-cuboid partially fused. Remove stitches- dress wound. r/v after 1/12.
205	2011-12-20	2014-01-22	2002-01-01	12.0583	17	M	wakiso								PIP Rt foot					IM quinine injection on right buttock		febrile illness		20/12/2011- c/o rt foot drop for 3/12 result of an IM quinine injection on the rt buttock from home for a febrile illness. oE: walks with high stepping gait. Paralysis of peroneii, tibialis anteriro and posteiror power 0/5. no deformity, no equinus. Plan: provide AFO. review with AFO. 17/1/2012- doing well on aFO. plan: continue with afo. review if problems. 14/1/2014- c/o progressive rt foot def…	TP tendon transfer. Made anteriormedial incision over the navicular detached the whole of the tibialis posterior made another incision at the level of the musculotendenious junction and rerouted it through the interosseous membrane to the cuboid. Did tenodesis washed wound, closed, dressed, removed tourniquet then applied pop. toes were pink.		right	foot			6/3/2014- 6/52 post tendon transfer off POP today. plan: provide AFO. review after 4/52 to assess teh gait. 3/4/2014- post tendon transfer in PIP. Muscle weak and foot still supinated. Plan remove stitches. Continue with aFO 2/6/2014- the boy is wearing AFO, day and night. no pain is reported. no active dorsiflexion of the foot. he walks quite well with the AFO on. RX: AFO during the day, to see …	AFO			27/4/2015- TP tendon transfer has not improved the deformity. OE: now walks with foot supinated, equinus deformity. Plan: triple arthrodesis rt foot on 30/4/2015. admit 29/4/2015.	2015-04-30	triple arthrodesis	22/6/2015- 7 weeks post triple. Wound healing fine. Foot in acceptable position. Plan short leg cast for another 6 weeks. 10/8/2015- post triple, aceptable position. Small granuloma, no stitch seen. Rest of wound healing fine, plan recast in corrected position for 6 weeks. return for cast removal, mold aFO and fit when ready. 29/9/2015- off POP today. plan: aFO day and night for 1/12 then night o…	4/5/2015- trained crutch walking and precautions of use given
206	2014-01-14	2014-01-22	2007-08-01	6.475	11	F	mugende	20							PIP Lt foot	2009-01-01	1.41667	5.03611					14/1/2014- calcaneal varus	14/1/2014- PIP lt foot. Was injected about 5 years ago has been manipulated previously from namutumba and had an AFO made, child walks on lateral border of the foot. Supination of the foot, callosity of the lateral border. Calcaneal varus deformity. achilles tendon not tight. Plan: ATL and TP lengthening lt foot on 22/1/2014.	TA tendon transfer. Found a supinated left foot with an active tibialis anterior tendon, detached it off its insertion on the medial cuneiform, made an another incision at its musculo-tendinous junction, retracted it initially to the lateral cuneiform but foot still had some residual supination, revised attachment to cuboidal and transfixed it with cushion, button and sutures on the plantar aspec…		left	foot	treat as per treatment chart. POP for 6 weeks.		11/3/2014- returns for control. Cast is off. Plan: lets measure an aFO. AFO x 4/12. R/V with AFO in 4/12. 10/6/2014- doing well, good dorsiflexion. Plan: CT using AFO. r/v in 2/12. 12/8/2014- TATT done, she is much better, walks well plan: continue AFO for 2 months, during the day. review in 6 months to see progress.	AFO
207	2014-01-14	2014-01-23	2005-01-01	9.06111	14	F	mityana	20							PIP Rt foot								14/1/2014- equinovarus	14/1/2014- rt foot PIP since 2/12 of age. Now has got a deformity of rt foot. Has got equino varus deformity rt foot. Has had several manipulation at namutamba. Plan: for mid foot osteotomy on 23/1/2014.	midfoot osteotomy. Percutaneous achilles lengthening done, equinus stil significant. Lateral incision, exposed and appropriate wedge osteotomy of the calcaneocuboid and talonavicular joints done foot plantargrade, closed wounds with 2/0 vicryl and applied cast. torniquet released and foot well perfused.		right	foot	elevate, split cast prn. Cast change next Wednesday. Drugs as per medicine sheet.		18/3/2014- pop taken off today, wound is clean. Plan= measure for aFO. r/v with aFO. Afo= 4/12 meanwhile, wound care.	AFO
208	2013-12-13	2014-01-24	2000-01-08	14.0444	19	M	wakiso								triple arthrodesis								16/12/2013- right rigid talipes equinovarus deformity	16/12/2013- PIP right fot. Had surgery in mulago tendon transfer. Clinically- right rigid talipes equinovarus deformity. TP, TA, peroneal all very weak. Plan right tripel arthrodesis. 17/1/2014- book for tripel arthrodesis on 24/1/2014. admit 23/1/2014.	triple arthrodesis		right	foot	abx and analg as per chart. Elevate the limb.		31/1/2014- manipulation and casting. 4/3/2014- 6 weeks post triple arthrodesis for pIP. Wound clean, foot plantegrade. Plan recast and review in 4 weeks. 28/4/2014- doing well wounds are clean and dry, plan: let's apply an aFO and review an with aFO. 29/10/2014- doing well rt foot plantegrade. plan: continue aFO use at night only. r/v 6/12 on 29/4/15.	AFO	1/8/2014- quad strengthening. Gait training.
209	2014-01-21	2014-01-29	2009-01-23	5.01667		F	mubende	17							Lt PIP with equinus lt foot					IM injection			21/1/2014- equinus with tight tendon achilles	21/1/2014- h/o injury to the left foot with ulcer over medial hind foot. 3.5 years ago. Treated by IM medication that lead to paralysis of lt lower limb eventual deformity of lt foot. No treatment so far. Clinically: lt foot - equinus with tight tendon achilles 180. unable to assess muscle activity. DX: lt pIP with equinus foot. plan: for percut ATL on 29/1/14. admit 28/1/14.	achilles tendon lengthening		left	foot	elevate limb.remanipulation next Wednesday. Analgesia as per chart.
210	2014-01-20	2014-01-29	2008-01-01	6.07778		F	wakiso	19							Left PIP									20/1/2014- history of injection details not known. Left foot drop, no motor function demonstrated. PMH/ PSH unremarkable. Plan achilles lengthening.	achilles tendon lengthening		left	foot	elevate limb. Remanipulation next wed 5/2/2014.		5/2/2014- manipulation and casting done. 6/3/2014- pop off today. Mild varus cavus and forefoot adduction but flexible. Plan: measre aFO, for use day and night x 3/12. r/v 1/12. foot exercises. 10/4/2014- afo has broken down. Has mild varus and forefoot adduction. plan: repair AFo from workshop. ct foo exercises. r/v in 3/12. 10/7/2014- been using aFO day and night. its still in good shape. has a…	AFO
211	2014-01-14	2014-01-31	2005-12-20	8.11389	13	M	wakiso	21							PIP rt foot	2009-01-01	3.03056	5.03611					14/1/2014- equinus and varus deformity.	14/1/2014- pip lt foot. Was injected at about 5 years ago when he sustained an equinovarus deformity of the lt foot. Child walks on the lateral aspect of the foot. MSK: weak TP tendon, power 2/5. equinus + varus deformity. Has got a flexible equinovarus. plan: let's apply a below knee pop cast then aTL and AFO later. r/v in 1/52 with cast off. 21/1/2014- pip lt fot. has equinus and varus deformit…	manipulation and casting		left	foot	elevate the limb. Analgesics: syp paracetamol 5 ml tds x 5 days. Keep cast for 4 weeks then aFO. Later will need triple arthrodesis.		28/2/2014- pop was taken off today. Lt foot well corrected. Unable to assess tendon function due to pain. Plan: give AFO with hinge for day and night use x 3/12. foot exercises. r/v in 1/12.	AFO
212	2014-01-21	2014-01-31	2004-01-05	10.0722	15	M	wakiso								PIP with canovarus foot	2012-01-01	7.98889	2.05556					21/1/2014- flexible cavovarus foot	21/1/2014- history of injection over 2 years. Much concerned about the high arch and slapping gait. Clinically TP/TA, ankle extensor and peroneals weak about 3-4/5. flexible cavovarus foot. Plan intrinsic release.	calcaneal osteotomy + intrinsic release. Medial longitudinal incision, released the adductor hallucis longus muscle from the deep fascia. Isolated the medial plantar neurovascular structures and transected the plantar fascia. Achieed some correction of the cavus. residual deformity due to bony structures. irrigated and closed the wound with vicryl 2/0.		right	foot	elevate the limb, analgesics and antibiotics, wound inspection and cast change next Friday 10/2/2014.		8/4/2014- 10 weeks post intrinsic release rt foot. Cast off today. Wound healed. Foot plantegrade no varus deformity. Plan: to workshop for aFO molding and eventual fittign when ready. See with aFO fitted. Re-cast foot if will take >5 days.	AFO
213	2014-01-20	2014-01-31	2002-12-25	11.1	16	F	gomba	43							PIP with calcaneovalgus foot								20/1/2014- calcaneovalgus	20/1/2014- PIP had surgery in mengo-2006. currently concerned about deformity, no pain. Clinically rigid calcaneovalgus foot, peroneals, tibialis anterior and posteiror transferred not functional, extensors good. Plan tripel arthrodesis.	ankle arthrodesis		right	foot			7/2/2014- manipulation and casting done. 9/4/2014- off pop today. The wound healed. Foot is well positioned. Plan: r/v after 4/52 to assess the gait. 2/6/2014- she reports pain in the forefoot area. Stil lsome swelling/ edema. The hind foot has good axis. there is flat foot with prominence of the navicular. able to squat- she walks quite well especially with teh shoes. rx: to see in 2/12 for clin…
214	2014-01-16	2014-02-03	2009-12-29	4.09444	9	F	jinja	15							PIP Rt foot								23/1/2014- pes equinovarus supinatus	23/1/2014- has been on serial manipulation and casting for pes equinovarus supinatus PIP. Still has adductus that is stiff but no equinus. Plan: for lateral column shortening on 31/1/2014. manwhile reapply a cast.	calcaneal osteotomy + intrinsic release. Incision medial border of foot. Identified and released the abductor hallucis from its origin. Identified and performed Z plasty of tibialis posterior tendon. Performed release of the talonavicular joint medially, anteriorly and laterally using same incision. lateral incision over calcaneocuboid jiont, performed 1.5 cm lateral wedge resection of the calcan…		right	foot	elevate the limb, analgesics and antibiotics as per Rx chart. Wound inspection and cast change next Monday 10/2/2014. pin in situ for 4 weeks.		25/3/2014- cast removed, wounds healed and pin removed. recast and return in 4 weeks for cast removal, mold and fit aFO. 29/4/2014- 4 weeks post intrinsic release rt foot + lateral column shortening. Cast off foot slight adductus no equinus sutures in situ. plan: remove sutures workshop for AFO, manipulate and keep foot in cast again. see with aFO fitted. 6/5/2014- afo fitting well. plan: 1) aFO …	AFO
215	2014-01-29	2014-02-04	2008-08-02	5.50556	10	M	wakiso	21							PIP Equinus Foot Rt	2011-01-01	2.41389	3.07778	since 2011	IM injection gluteal			29/1/2014- equinus foot, mild forefoot varus	29/1/2014- c/o limping gait x 3 years. Preceded by IM injection rt gluteus in early childhood. Gradually developed weakness on the rt leg and now walks with a limp and occasional pain on the toes. No attempt at treatment before. Ros: unremarkable. Oe: limping and walks on tip toes rt foot. rt equinus foot, mild forefoot varus. imp: pip rt foot equinus. plan: for percutaneous ATL on 4/2/2014. admi…	percutaneous achilles tendon lengthening		right	foot	elevate right foot. Monitor toe ciruclation. Pop for 3 weeks.		26/2/2014- 3 weeks post ATL for PIP rt foot. Oe: cast off today. Passive ankel dorsiflexion good. No varus deformity. Plan: to workshop for AFO measurement, molding and fitting. Re cast foot. see with AFO.	AFO
216	2010-12-17	2014-02-05	2000-01-01	14.0944	19	M	kibaale								PIP Lt foot	2003-01-01	3	7.96111		quinine injection			17/12/2010- equinus varus supinatus foot	17/12/2010- h/o quinien injection at 3 yo, not reatment till now. Deformity of the lt foot. Oe: eqinus varus supinatus foot. Tp muscle seems to be acive. Dx: pip lt foot. Plan: 1st phase: aTL and POP, then afo. 2nd phase: tp transfer after reevaluation. 14/4/2011- off pop today. foot is flexible. has afo. plan: use afo. review in 4/52. for reassessment for tendon transfer. 19/5/2011: doing well o…	triple arthrodesis		left	foot	elevate limb. Analgesia as per chart, wound inspection next wed, monitor toe circulation		11/4/2014- post tripel arthrodesis and remanipulation oe/ wound healed and clean. Mild varus foot plantegrade. Plan: aFO measurements. Replace POP until AFO ready. 17/4/2014- has just acquired the afo. Plan: review after 8/52 to assess the foot.	AFO
217	2014-01-23	2014-02-06	1997-01-01	17.0972	22	F	lira	52							PIP Rt foot									23/1/2014- has rt foot deformity post injection. Pt had had surgery before but it was not successful. Plan: for triple arthrodesis on 6/2/2014.	mid-tarsal osteotomy. Ollier's incision. Found all toe long extensors seered and scarred, fused subtalar joint. Did: mid tarsal wedge osteotomy at level of talovaciular and calcaneocuboid. Corrected the midfoot varus, the first ray in flexion deformity and so are the other toes. irrigated and closed in layers. applied short leg cast. deflated tourniquet with good perfusion return.		right	foot	elevate the limb, analgesics and antibiotics as per Rx chart. Wound inspection and remanipulation next Thursday 13/2/2014. she will need shortening of 1st ray and arthrodesis of the digits later.		13/2/2014 and 24/2/2014- manipulation and casting done. 8/4/2014- still has residual forefoot adduction and varus. Wound has not healed completely. Plan: wound care. aBCs measure for AFO, if not ready re apply cast until its ready. 11/4/2014- wound healing and clean. AFO fitting well. residual varus foot. plan: aFO use full time x 2/12. daily wound dressing. D/C and review on 6/6/14.	AFO
218	2014-02-06	2014-02-10	2013-07-11	0.580556		M	bundibugyo	6.1							Rt foot equinus supinatus (PIP?)							immunization	6/2/2014- equinus and supinatus.	6/2/2014- child brought for deformity of rt foot. Sent for the rt clubfoot. Clinically, the foot is equinus and supinatus. The impression is of PIP even if there is no h/o injection apart from those given for immunization. D: rt foot equinus supinatus. rx: for atl and POP on 10/2/2014.	manipulation and casting		right	foot	elevate right foot. Pop for 3 weeks, then give SFABS
219	2014-02-04	2014-02-10	2012-01-01	2.10833		F	kamwenge		10						PIP Rt foot	2013-01-01	1	1.09167	since april 2013	IM gluteal injection				4/2/2014- h/o progressive deformity rt foot x 10 moths. Preceded by intra gluteal injection. Developed weakness rt lwoer limb and foot deformity. Has been treated with oral and topical medicine to no effect. Ros: unremarkable. Oe: limping gait tight achilles tendon. imp: pip rt foot. plan: for percutaneous ATL on 10/2/2014. admit on 9/2/2014.	percutaneous achilles tendon lengthening		right	foot	pop for 3 weeks, monitor toe circulation, elevate right foot.		25/3/2014- 3 weeks post aTL rt foot due to PIP. Oe: cast off today, foot plantegrade. Plan: afo measurement, molding and fitting. Put foot in cast. Admit to hostel as awaits AFO.	AFO
220	2014-02-04	2014-02-10	2004-05-02	9.77222		M	ntungamo	25							PIP Rt foot	2008-01-01	3.66389	6.09167	since 2008	IM gluteal injection			4/2/2014- equinovarus	4/2/2014- h/o recurrent rt foot deformity x 6 years. Preceded by intra gluteal injection, gradually developed weakness and deformity rt foot. Has undergone manipulation and aFO use while in mbarara but mother noted deformity recurring. Ros: unremarkable. oe: equinovarus foot rt lwoer limb. weak TP and absent TA FUNCTION. imp: PIP RT foot. plan: for triple arthrodesis rt foto on 10/2/2014. admit 9…	triple arthrodesis		right	foot	elevate limb, treat as per drug chart, monitor toe circulation, for wound inspection and cast change on 17/2/2014.		17/2/2014- manipulation and casting done. 28/4/2014- well corrected foot, review with aFO. 30/4/2014- 11 weeks psot triple arthrodesis rt foot. Seen with afo fitted. Plan: full time aFO donning. Intermittent ankle joint ROM. See in 8 weeks. 3/7/2014- doing well post triple arthrodesis. no major complaints. plan: day time AFO. r/v in 2/12.	AFO
221	2014-02-11	2014-02-14	2006-10-13	7.33611	12	M	jinja	24							PIP Lt foot	2008-01-01	1.21667	6.11111	2008-2014.	IM gluteal injection			11/2/2014- equinovarus	11/2/2014- h/o progressive deformity lt foot x 6 years. Preceded by Im gluteal injection. Limb progressively weakned and the foot deviated. Was treated in bugembe hc but deformity recurred. Ros: unremarkable. Oe: equinovarus lt foot. Tp power 4+. Weak/absent TA function. im: pip lt foot. plan: for percutaneous aTL on 14/2/2014. admit 13/2/2014.	percutaneous achilles tendon lengthening		left	foot	elevate limb, monitor toe circulation, analgesia as prescribed, remanipulation next Friday
222	2014-02-04	2014-02-14	2002-01-01	12.1194	17	M	isingiro								PIP Lt foot								4/2/2014- equinus	4/2/2014- PIP lt foot. Has been under going M +C and has had 3 casts. Foot now in equinus. Has a rigid achilles tendon. TP and TA are weak 25. plan: wound benefit from triple arthrodesis. 20/3/2014- for measurement of aFO today. r/v with AFO. 25/3/2014- walks well with aFO. to use AFO daily. plan: r/v in 4/52.	percutaneous achilles tendon lengthening		left	ankle	elevate the limb, analgesics. Remanipulation next Friday 21/2/2014
223	2014-02-03	2014-02-20	2009-01-01	5.13611	10	F	nakasongola	13							PIP with severe equinus deformity					quinine			4/2/2014- severe achilles contracture equinus deformity	4/2/2014- plan achilles lengthening and posterior ankle capsulotomy. Meanwhile apply cast for these 2 weeks.	percutaneous achilles tendon lengthening		left	heel	elevate the limb, analgesics as per rx chart, remanipulation next Thursday 27/2/2014.		26/2/2014- two weeks post ATL lt side. Has come for remanipulation tomorrow. Oe: foot in equinus in short leg cast. Plan: for remanipulation on 27/2/2014. admit today. 27/2/2014- manipulation and casting done. 11/4/2014- lt foot-well corrected. Pop removed today its flexible. plan: measure for AFO, if not ready re apply pop. r/v with aFO.	AFO
224	2014-01-27	2014-02-28	2003-01-01	11.1583	16	M	kabale	31							PIP								27/1/2014- club foot	27/1/2014- left club foot, clinically left foot drop, lost a bit of the little toe. Foot a bit stiff, tibialis anterior very strong, recommendation initial manipulation and casting and when corrected will do tendon transfer	triple arthrodesis		left	foot			10/3/2014- manipulation and casting done. 23/4/2014- 6 week post triple arthrodesis, wound heeling well. Mild residual forefoot varus. Plan: measure for aFO. Then remanipulate and apply cast. When aFO ready see in clinic.	AFO
225	2014-03-04	2014-03-05	2008-07-06	5.66389	10	M	sembabule	5.3							PIP Rt foot										percutaneous achilles tendon lengthening		right	foot	remanipulation next week, monitor toe circulation, elevate limb, analgesia as per chart		22/4/2014- post achilles lengthening. Foot plantegrade. Workshop to mold and fit AFO. Review after fitting. 24/4/2014- the foot is in good position, flexible, aFO provided. No musclar activity, except for reflective and the extensive hallucis longus. plan: afo during day and night. foot manipulations control in 2/12.	AFO
226	2014-02-20	2014-03-07	2000-05-25	13.7833	19	m	mukono	27							PIP Lt foot	2012-01-01	11.6	2.13611	2012	quinine IM injection			20/2/2014- equinovarus	20/2/2014- PIP qnn 2 years ago started developing deformity of lt foot that progressed as he grew older. pIP injected 2 years ago and now has equinovarus lt foot. Now says the foot is painful. Plan: for triple arthrodesis lt foot on 5/3/2014.	percutaneous achilles tendon lengthening		left	foot	monitor toe circulation. Elevate limb, analgesia as per treatment chart		8/4/2014- cast off. Plan: for AFO then r/v ith aFO. 24/4/2014- has acquired an aFO. Plan: review after 6/12.	AFO
227	2014-03-05	2014-03-10	2008-01-01	6.19167	11	M	alebtong	19							Rt PIP					IM injection			6/3/2014- rt pes equinovarus supinatus	6/3/2014- rt pes equinovarus supinatus following intromuscular injection. Has a foto drop. Equinus is severe and rigid but the varus and adduction are flexible. Dx: pIP rt foot. Plan: for percutaneous aTL and POP 1st stage on 10/3/14. possible tendon transfer 2nd stage after reassessment.	archilles tendon lengthening		right	foot	elevate right foot. Treat as per treatment chart. Remanipulate on 17/3/2014.		17/3/2014 and 24/3/2014- manipulation and casting. 17/4/2014- off pop yesterday 4/52 post percutaneous aTL rt. Plan: provide afo r/v after 4/52 with afo to reaccess for possible tendon transfer. 31/7/2014- using an afo. No muscle power in the foot except planter flexion. plan: continue with the aFO day and night. review afer 6/12.	AFO
228	2014-03-10	2014-03-14	2010-07-12	3.67222	8	M	ntungamo	14							Left PIP								11/3/2014- club foot	11/3/2014- history of injection early childhood with progressive waekness and deformity of the foot, limps clinically global atrophy of the left lower limb, club foot, knee good and hip also good. Plan achilles lengthening Friday.	percutaneous achilles tendon lengthening		left	ankle	elevate the limb. Analgesics. Discharge this afternoon can go home tomorrow morning if no problems. Cast for 4 weeks the removal and aFO.		19/6/2014- doing well with aFO. Without the aFO he walks without a foot drop. However, he has slightly tight hamstrings that keep the knees slightly flexed. Plan: for only night time bracing with aFO. PT for muscle strengthening and stretching of the hamstrings. review after 3/12. 19/9/2014- flexion contracture of 20 degrees hip and knee. biceps femoris and iliotibial band tight. foot plantegrade…	AFO
229	2014-03-18	2014-03-21	2002-01-01	12.2222	17	f	MBARARA	27							neuropathic clubfoot/PIP								18/3/2014- neuropathic clubfoot/ pIP	18/3/2014- tibialis posteiror 5/5/, tibialis anterior 3/5, peroneal 3/5. plan achilles lengthening, intrinsic release +/- midfoot osteotomy and if foot plantegrade, will do tendon transfer.	mid-tarsal osteotomy. Performed percutaneous ATL. Media incision releases the adductor hallucis muscle and performed plantar fasciotomy. Tranverse mid-foot incision retracted extensor tendons exposed mid-tarsal joints performed dorsal based wedge osteotomy able to correct the bony cavus deformity, and the equinus, resultant foot plantegrade.		right	foot	elevate the limb, monitor for limb swelling, split cast if swelling much. Analgesics and antibiotics. For wound inspection, remanipulation and cast change next Friday 28/3/2014.
230	2014-03-05	2014-03-24	2008-08-01	5.64722		M	lira	17							Rt PIP					quinine gluteal Im injection			6/3/2014- pes equinovarus supratus	6/3/2014- the varus and metatarus adduction are rigid while the equinus is not severe. Dx: pIP. Plan: lets start with serial m and c. meanwhile stay at the hostel.	shortening of lateral column. Lateral incision based over calcneocuboid joint. Dissected origin of extensor digitorum brevis from calcaneus and reflexted it distally. Performed lateral based wedge osteotomy distal calcaneus not disturbing the calcaneocuboid joint. stabilized osteotomy with 2 smooth k wires.		right	foot	elevate the limb and monitor for swelling; if swollen a lot split the cast. Analgesics and antibiotics as per Rx chart. Check x ray. Wound inspection and cast change next Monday 31/3/2014. k wires removal after 4 weeks.		15/5/2014- 7/52 post lateral column shortening. K wire still in situ. Plan: remove k wire and provide an aFO. continue wound care. review after 4/52.	AFO
231	2014-03-05	2014-03-24	2002-04-04	11.9722	17	M	lira	25							? PIP Rt								6/3/2014- pes equinovarus supinatus	6/3/2014-"rt pes equinovarus supinatus reportedly of spontaneous onset?? Now has severe cauvs and metatarsus adductus plus a heel varus. Equinus is not severe. Plan: for triple arthrodesis in the near future. Meanwhile lets start with serial manipulation and casting. "	triple arthrodesis		right	foot	elevate the limb and monitor foot circulation and swellings. Analgesics + antibiotics as per rx chart. Wound inspection + remanipulation next Monday 31/3/2014.		15/5/2014- 7/52 post tripel arthrodesis. Off pop today. Plan: review in 4/52 to assess the gait. 10/7/2014- the gait is satisfactory despite having a slight heel varus. Plan: review after 6/12 or earlier if major problems.
232	2014-03-20	2014-03-26	2006-01-01	8.23611		M	bundibugyo								PIP Lt foot	2007-06-01	1.41667	6.80278					20/3/2014- equinovarus deformity and a limp clinically	20/3/2014- PIP lt foot since the child was 1.5 years old child now walks with an equino varus deformity and a limp clinically. Flexible varus deformity and tight achilles tendon. TA and TP tendon power -1/5 (flickering). Imp pIP lt foot. Plan: for triple arthrodesis of the lt foot on wed 26/3/2014.	percutaneous achilles tendon lengthening		left	foot	for remanipulation on 2/4/2014. elevate the left foot.		2/4/2014- manipulation and casting done. 2/5/2014- lt foot plantegrade. Measure for aFO then. r/v meanwhile re apply pop until get aFO. 5/5/2014- post ATL lt foot. Lt foot is plnategrade. Has AFO but with no hinge. Has wound over anterior aspect lt ankle. Plan: put hinge on aFO in o/w. cps amoxyl 250 mg tds x 5/7. d/c from hostel, r/v/ x 2/12. use afo day and night. 7/7/2014- foot plantegrade. af…
233	2014-02-26	2014-03-31	2013-01-01	1.25	6	F	busia	10							Rt PIP					gluteal iM injection				26/2/2014- result of gluteal iM injection now the child finds difficulty walking. No equinus. Plan: pT. review after 3/12. discussed with PT and the child needs admission to the hostel for intensive PT for 3 days.	manipulation and casting		right	knee	pop for 2 weeks. Elevate limb		16/4/2014- off POP today. Plan: PT for rt knee ROM exercises. Review after 4/52.
234	2014-04-02	2014-04-04	2008-06-02	5.83889		M	apac	18							PIP Rt foot	2011-01-01	2.58056	3.25278	2011-2014	gluteal iM injection			3/4/2014- equinovarus feet	3/4/2014- progressive rt foot deformity x 3 years. Preceded by im injection rt gluteal region. No formal treatment before. OE: equinovarus feet. Imp: pip rt foot. Plan: for percutaneous ATL on 4/4/2014. transfer to ward today.	percutaneous achilles tendon lengthening		right	ankle	elevate the limb, analgesics. She will need posterior ankel capsulotomy and midfoot osteotomy (if her chronological age > what is written). Remanipulation next Friday 9/4/2014.		11/4/2014- manipulation and casting done.
235	2014-04-02	2014-04-04	2004-04-15	9.96944		F	apac	28							PIP Rt foot	2009-01-01	4.71111	5.25278	2009-2014	gluteal Im injection				3/4/2014- progressive deformity rt foot x 5 years. Preceded by injection into the gluteus, never had any treatment before. OE: walks tip toeing, tight achille's tendon. Imp: pIP rt foot. Plan: for percutaneous atl rt foot on 4/4/2014. transfer to ward today.	percutaneous achilles tendon lengthening		right	foot	drugs as per chart, elevate limb. Remanipulation on 11/4/2014.		11/4/2014- manipulation and casting done. 23/4/2014- mid tarsal osteotomy done. 30/4/2014- manipulation and casting done .
236	2014-04-02	2014-04-07	2008-06-30	5.76944	11	F	apac	17							Equinus feet ? PIP R/o	2013-01-01	4.50278	1.25278	2013-2014			febrile illness	3/4/2014- equinus feet	3/4/2014- progressive deformity both lower limbs x 1 year. Was born normally, walked well, had febrile illness received injections later developed weakness and progressive deformity of both feet and walks on toes. OE: small ulceration 5th toe lt foot, bilateral equinus feet and slight knee flexion contractures, hips adductus slightly tight. imp: PIP both limb. plan: for bilateral aTL and knee str…	archilles tendon lengthening		bilateral	foot	elevate both feet. Monitor toe circulation. Pop for 3 weeks		6/5/2014- casts off today. Feet plantegrade. Plan: 1) to workshop for AFO. 2) recast feet. 3) see with afo.	AFO
237	2012-04-26	2014-04-09	2008-08-07	5.67222	10	F	wakiso								PIP right foot									18/11/2010- drop foot rt result of burns rt thigh and both legs. On aFO since 2009. the foot is plantegrade. Tibialis anterior 0. extensors 1-2. peroneals 0. tibialis posterior 4-5. plan: continue with aFO. For tibialis posterior transfer around 5 yo. review in 1/12. 26/4/2012- the child is back for review. the aFO has been discarded for the last 12/12. the foot can be brought passively, to 90 de…	TP tendon transfer. Anterolateral incision over the navicular detached the whole of the tibialis posterior tendon, made another incision at the level of the musculotendenious junction and rerouted it through the interosseous membrane to the cuboid, did tenodesis.		right	foot	elevate goot, treatment as per drug chart. Pop for 6 weeks.		9/5/2014- wound have healed. No activity in transferred tendon but its 4/52 post surgery. Plan: measure for aFO then re apply pop to complete 6/52 of casting. r/v on 23/5/14 for pop removal and aFO fitting. 23/5/2014- has got aFO. Rt foot plantegrade. transfered tendon- not properly assessed due to pain. plan: put hinge in aFO, use it day and night. r/v in 1/12. 26/6/2014- has a pressure point me…	AFO
238	2014-04-02	2014-04-14	2001-12-08	12.35	17	F	apac	38							PIP Rt foot	2003-01-01	1.06389	11.2528	2003-2014	gluteal IM injection			3/4/2014- forefoot varus	3/4/2014- progressive deformity rt foot x 11 years. Had multiple iM injection rt fluteus neonatal period. OE: forefoot varus TP power 5 no equinus. Plan: will need TPT next week after manipulation and casting. Provide short leg cast and crutches. See in clinic next week. 10/4/2014- the foot is now flexible. no equinus. tibialis posteiror tendon power 5/5, the tibialis anterior and perioneii power…	TP tendon transfer. Dissected the tibialis posterior over its insertion on the medial cuneiform and mavicular, approximately 7 cm above ankle joint the tendon is retracted at the musculotendinous junction, secured it with vicryl 1, through interosseous membrane transfered it to midline of foot to base of 3rd metatarsal. transfixed it with plantar cushioned button and stitches.		right	foot	elevate right foot. Treat as per treatment chart. POP for 6 weeks.		2/6/2014- pop off today, remove stitches. The foot is in good position, plantegrade. All the wounds are ok. There is a small ulcer in the ankle area, dorsally. Rx: refer the patient to O/W for aFO. To review when AFO is provided. 6/6/2014- has an ulcer over anterior aspect of rt ankle joint- clean. no activity yet transferred tendon. has aFO. plan: do foot exercises. put hinge on aFO. use aFO day…	AFO
239	2014-04-17	2014-04-22	2010-07-30	3.72778	8	M	alebtong								Equinus Lt foot in PIP								17/4/2014- equinus and mild metatarsus adductus	17/4/2014- left pip with equinus and mild metatarsus adductus. Plan: for percutaneous ATL.	percutaneous achilles tendon lengthening		left	foot	elevate the limb. Monitor circulation of the toes. Treat as per drug chart		29/5/2014- just off POP. Plan: provide aFO. Review after 4/52 with AFO. 28/11/2014- doing well on aFO. The foot has no deformity. But walks with a foot drop. He seems to be out growing the AFO. Plan: 1) to workshop for repair of aFO. 2) advised to wear ordinary shoes on top of the AFO. 3) R/V after 6/12. 17/11/2016- child back for foot control after 2 years. the foot is varo-supinatus, passively …	AFO
240	2014-04-15	2014-04-23	2000-12-25	13.3278	18	F	mubende								PIP Rt foot								15/4/2014- knee valgus. Fore foot adductus	15/4/2014- PIP rt foot managed at namutaba atusing cast and later AFO. Returns with deformity of the foot but also has a rt knee valgus. Clinically rt foot- fore foot adductus. Valgus rt knee- 20 degrees. X ray of rt knee- valgus at the distal femur. plan: stage 1: calcaneal at the rt foot. stage 11: varus osteotomy of rt femur later. for calcaneal osteotomy/ triple 23/4/14.	mid-tarsal osteotomy. Through ollier's approach made skin incision to expose talonavicular and calcaneocuboid joints then made wedge osteotomies to correct the deformity.		right	foot	elevate limb, wound inspection on 30/4/2014		30/4/2014- manipulation and casting done. 19/5/2015- PIP rt foot. Had midfoot osteotomy 4/2014 reports pain in the foot. Had a POP cast from namutamba a week ago. OE: hindfoot varus, tenderness midfoot. No obvious movement. X ray: fusion at the midfoot and aprt of subtalar. plan: wil benefit from subtalar osteotomy. provide AFO. brufen 200 mgs tds x 10 days. see in 4 weeks for planning for surger…	AFO			16/6/2015- still has a lot of pain at oepration site unable to bear weight due to pain. No sinus discharged. OE: tenderness along the surgical site, varus deformity forefoot, residual hindfoot varus. Plan: revision: mid tarsal osteotomy next week wed/thurs	2015-06-24	triple arthrodesis
241	2014-03-24	2014-04-25	2002-07-06	11.8028	16	M	wakiso	28							PIP Right foot								24/3/2014- talipes equinovarus foot	24/3/2014- PIP with talipes equinovarus foot. Plan calcaneal osteotomy, tibialis posterior tendon transfer. Schedule for surgery during holidays. 22/4/2014- schedule for calcaneal osteotomy and tibialis anterior tendon transfer.	TA tendon transfer. Through a lateral incision to the calcaneous performed a lateral closing wedge osteotomy to correct the heel varus. Transferred the insertion of the tibialis anterior tendon laterally to the lateral cuneiform. Closed the incision, dressed and deflated the tourniquet.		right	foot	elevate the limb. Treat as per drug chart. Monitor the circulation of the toes and for swelling.		25/6/2014- just off Pop post tendon transfer. The wounds have healed. Plan: remove stitches. Provide AFO. Review after 4/52 to assess the gait. 23/7/2014- he walks quite well even without the aFO post tendon transfer. Plan: discontinue the aFO. Review after 6/12. 8/6/2015- PIP post tendon transfer. doing fine. painful rt knee. osgood schallater's disease. plan: slow down inactivity. uboprofen 200…	AFO
242	2014-04-02	2014-04-28	2002-08-07	11.725	16	F	apac								PIP Lt foot + windswept knees	2005-01-01	2.4	9.25278	2005-2014	gluteal IM injection		febrile illness	3/4/2014- equinus foot	3/4/2014- progressive deformity lt leg and foot x 9 years. Preceded by injection into the lt gluteal region after febrile illess. Now walks with difficulty and pain in the foot and ipsilateral knee and using walking cane. oE: limping gait, equinus foot, genu varum 20 degrees and knee flexion deformity 30 degrees. plan: for midfoot osteotomy + aTL and plantar fasciotomy lt foot on 7/4/2014. transf…	percutaneous ATL		left	lower	elevate left lower limb. Pop for 6 weeks but give short leg cast after 3 weeks in OPD to allow knee pT.		10/6/2014- 6 weeks post mid foot osteotomy lt. wound helaed sutures in situ, has plaster sores on heel; extension lag 15 degrees. Rt genu valgum. X ray: dysplasia lt tibia. Plan: workshop for AFO measurements. Re apply cast with window. Will benefit from corrective osteotomies lt tibia and rt femur when foot fully healed. 16/6/2014- foot plantegrade but in slight valgus. fitted with AFO. continue…	AFO
243	2014-04-23	2014-04-28	2002-01-01	12.325		F	kampala	33						23/4/2014- complains limping gait rt leg x 10 years	PIP Rt foot					Im gluteal injection			23/4/2014- equinus foot with clamp of the toes	23/4/2014- complains limping gait rt leg x 10 years. Proceeded by I injection rt gluteus. Then developed weakness and limping gait, not on any formal treatment. OE: equinus foot with clamp of the toes. Imp PIP rt foot. Plan: for aTL on 28/4/2014. admit 27/4/2014.	achilles tendon lengthening		right	foot	elevate right foot. Remanipulation on 5/4/2014.		6/5/2014- manipulation and casting done. 11/6/2014- manipulation and casting done. 3/7/2014- post STL, removed POP today, right foto is plantegrade. Plan: take negative cast for aFO, then if not ready, re apply POP. R/V with AFO. 10/7/2014- got AFO and been instructued on how to use. plan: use it day and night with intermittent exercises and r/v in 3/12. 15/1/2015- rt foot is in equinus but semi …	AFO
244	2012-01-23	2014-05-02	2008-11-30	5.42222	10	M	Masaka	25 kg	129 cm					walks on the anterior side of Rt foot, 5 degrees of dorsiflexion possible	PIP Rt foot	2009-01-01	0.0861111	3.06111					equinovarus Rt foot; was given AFO without joints 2 years prior surgery	inactive TA/ TP. Forefoot adductus, tight achilles tendon, limited dorsiflexion	percutaneous achilles tendon lengthening	AFO, PT		foot	elevate the limb, analgesics, remanipulation on 9/5/2014. will need tendon transfers later.		18/9/2014-foot well corrected. Doing well with AFO. 28/1/2019- still has a mild foot drop. Continue PT from home. Received manipulation and another percutaneous ASTL and POP on 11/12/2017	AFO
245	2011-12-13	2014-05-06	2002-11-18	11.4667	16	F	luwero								PIP Lt EVS								13/12/2011- lt pes equinovarus supinatus	13/12/2011- lt foot drop in pIP. Oe: lt pes equinovarus supinatus. Tibial posteiror power 5/5. tibial anterior power 0/5. plan: for percutaneous aTL and POP. 19/1/2012- please remove the cast. About 20 degrees of dorsfilexion possible. For tibialis posterior transfer on 17/2/2012. plan: aFO. to review on 24/1/2012. with AFO.	triple arthrodesis		left	foot	elevate the limb. Teat as per drug chart. Monitor circulation and swelling of the toes. For wound inspection and final cast on 12/5/2014.		24/6/2014- pop off today, surgical wound ok. The foot is in good position, flexible. Rx: remove of stitches. Apply walking cast x 30/7. 22/7/2014- 10 weeks post triple has been using walking cast last 40 days. Cast off today foot plantegrade. Plan: to workshop for aFO: measurement, molding and eventual fitting. see with AFO fitted. 25/7/2014- has got aFO today. instructed pt on how to use AFO. pl…	AFO
246	2013-10-07	2014-05-07	2007-07-31	6.76944		F	Luwero								Left PIP								forfoot adductus	7/10/2013- slight foot adductus, ankle is plnategrade. Doing well, TP tendon is quite strong power 3/5. plan: avail AFO fro 3 months, review in 3 months. 12/2/2014- lt PIP foot. AFO broken and brought for repair. OE: forefoot adductus. No equinus. TA function 4/5. TP weak 2/5 plan: continue AFO use. will need TAT during school holiday. pectylin c 5mls TDS x 5 days. amoxyl 250 mg TDS x 5 days. see…	TA tendon transfer. Incised skin and exposed insertion of tibialis anterior tendon on the medial cuneiform, detached it and retracted it at its tendomuscular junction over the anterior distal tibial compartment transferred it through lateral cuneiform and transfixed it through sole of foot with button.		left	foot			19/6/2014- just off POP today, post tendon transfer. The wounds have all healed. Plan: lets provide an aFO. Review in 2/12. 15/8/2014- has aFO, still uses it day and night. Transferred tendon is active and left foot can dorsiflex. Plan: continue afo day and night for 3/12. 20/11/2014- transfered tendon is active, uses AFO day and night. clinically: foot is rigid. plan: continue AFO use at night t…	AFO	26/5/2015- exercises: 1) resisted active dorsiflexion (maual resistance). 2) heel raise in standing position. 3) balancing exercises (balancing board, single leg). 4) walking (on heels, frog walking, jumping). Attendant advised to continune with therapy at home.		22/8/2018- still has a fairly rigid heel varus and forefoot adductus but no equinus. Had tibialis posterior tendon transfer 4 years ago and has no foot drop has painful swelling of the lt tibial tuberosity. Plan: let's schedule for triple arthrodesis of the lt foot. meanwhile NSAIDS.	2019-02-11	triple arthrodesis	25/4/2019- wound has healed. Foot plantegrade. Plan: reomve stithces, avail aFO, review after 2/12. 27/6/2019- doing well, plan: continue aFO use. Repair aFO. r/v during holidays.	12/2/2019- seen patient in ward post lt leg, on below knee pop lt. rx: trained ambulation using crutches, patient knows how to walk with crutches. NWB lt.
247	2014-05-13	2014-05-16	2006-01-01	8.375	13	F	hoima								PIP left foot	2012-01-01	6	2.36667					13/5/2014- slight equinus with a varus foot	13/5/2014- pip left foot following an injection about 2 years ago and has been undergoing serial casting at manutamba. Has got a foot in slight equinus with a varus foot. Clinically: PIP left foot. Plan: for ATL left foo on 16/5/2014.	percutaneous achilles tendon lengthening		left	foot	elevate limb, remanipulation 23/5/2014, consider bone procedure later		23/5/2014- manipulation and casting done. 30/5/2014- manipulation and casting done.
248	2014-05-15	2014-05-19	2007-09-08	6.69722		M	alebtong	22							PIP Lt foot								15/5/2014- pes varus supinatus with no equinus.	15/5/2014- left pes varus supinatus with no equinus. The history is not clear but is not congenital. Oe: has heel varus but flexible with flexible metatarsus adductus. Active tibialis posterior, power 5/5 but weak tibialis anterior and peroneii muscles. plan: for tibialis posterior tendon transfer on.	TA tendon transfer. Detached the tibialis anterior at its insertion and transferred it through the 4th metatarsal head and transfixed it with button and cushion at heel of the foot.		left	foot	elevate left foot. Pop for 6 weeks		10/7/2014- left position is good, has some activity in transferred tendon, removed POP yesterday. Lets measure for aFO then review. 15/7/2014- aFO provided, it is fitting well. Rx: AFO for 2/12, day and night. Exercises for foot dorsiflexion. Clinical control in 2/12. 25/9/2014- can dorsiflex foot to about 90 degrees to axis of tibia. has a slight foot drop when walking, power 3/5. plan:r epair A…	AFO	15/7/2014- ankle mobilization exercises
249	2014-05-19	2014-05-20	2002-05-02	12.05		F	katakwi	28							Rt PIP					IM gluteal injection			19/5/2014- right pes equinovarus supinatus	19/5/2014- 12 yo girl with right pes equinovarus supinatus following an iM gluteal injection. OE: severe equinus with midfoot cavus. Plan: will need a mid-tarsal osteotomy in the future, but first, for percutaneous ATL tomorrow. Admit to the ward.	percutaneous achilles tendon lengthening		right	foot	POP for 1 week and then do triple arthrodesis on 26/5/2014. elevate right foot.							2014-05-26	triple arthrodesis	2/6/2014- manipulation and casting done. 23/6/2014- tripel arthrodesis 26/5. has wound site infection. Admit for debridement tomorrow. Cefazolin 500 mg IV once a day.				2014-06-24	bone cement removal	30/6/2014- manipulation and casting done. 21/7/2014- infected wound. Plan admit for debridement tomorrow. 22/7/2014- manipulation and casting done. 25/7/2014- dressing and recast. 258/2014- POP off today. Foot is plnategrade, painless, surgical wound. OK. RX: to O/W for afo (x 2/12) d/x home after provision of aFO. progressive weight bearing. to see in 2/12, for clinical control, admit to hostel.…
250	2014-05-02	2014-05-23	2003-04-29	11.0667	16	m	lira								Right PIP					IM injection			19/5/2014- cavovarus foot	19/5/2014- history of intra muscular injection preceeding foot deformity. Serial casting has been attempted with little progress. Clinically cavovarus foot, right will need calcaneal osteotomy and intrinsic release.	calcaneal osteotomy + intrinsic release. Through medial incision released the adductor hallucis muscle and performed plantar fasciotomy. Lateral incision retracted peronei, performed osteotomy through the calcaneus and swung it laterally and stabilized with 3 parallel smooth k wires. irrigated wounds and closed in layers with vicryl 2/0. applied short leg cast, deflated tourniquet with good toe p…		right	foot	elevate and monitor for swelling. Analgesics and antibiotics. Check x ray. Cast and k wires for 4 weeks then removal of wires.		10/7/2014- has completed 6/52 of casting but still has k wires in situ and has an ulcer over lateral aspect of right calcaneous. Right foot is stiff with foot in relatively good position. Check xray: subtalar joint fused, osteotomy site too has fused. K wires still in situ. plan: k wires removal. wound care. give aFOs then review. 15/7/2014- AFO provided it is fitting well. there are two small, g…	AFO	15/7/2014- anle mobilization exercises
251	2014-05-16	2014-05-26	2002-01-01	12.4028		M	kampala	34							PIP Lt foot					IM injection			16/5/2014- foot equinus varus supinatus	16/5/2014- H/P im injection, followed by deformity of lt foot. OE: foot equinusvarus-supinatus. Able to walk on the outer border. DX: PIP lt foot. Rx: for triple arthrodesis lt foot and excision of the callus in the last intradigital space.	manipulation and casting		left	foot	elevate foot. Pop for 6 weeks		1/7/2014- pop off today. The surgical wounds fine. Foot in good position. Rx: remove stitches. Apply walking cast for 30/7. to see in 30/7 for pop removal.
252	2014-05-22	2014-05-26	1998-05-06	16.0556	21	F	nakasongola								PIP Rt	1998-11-01	0.486111	15.5583		IM injection			right foot plantegrade	22/5/2014- deformity in the rt foot with a h/o iM injection at the age of 6 months. Plan: for percutaneous aTL on 26/5/2014	percutaneous achilles tendon lengthening		right	foot	keep cast for 4 weeks. Monitor toe circulation.		3/7/2014- patient has had POP removal today. Right food is plantegrade but has some forefoot adduction and varus deformity. Plan: take negative cast for aFO if not ready to day reapply cast. 17/7/2014- has got aFO, foot is plantegrade. Instructed her on how to use AFo, day and night. r/v in 3 months. 2/6/2016- no complaints. there is a varus deformity of 14 degrees while lying down (10 degrees of…	AFO				2016-09-09	mid tarsal osteotomy done	18/10/2016- 6 weeks post mid tarsal osteotomy left foot. No major issues. Oe: cast off, wound superficial infection in some areas sutures in situ, foot plantegrade, no hindfoot varus, no tenderness at osteotomy site. Plan: to ortho-workshop for aFO measurement. sutures off today. caps ampiclox 500 mg QID x 5 days. see with aFO fitted.	15/9/2016- had a counseling session with both the pt and the caregiver. Discussed social stigma and self perception.			2018-08-16	triple arthrodesis done	17/8/2017- painful right foot following a mid tarsal osteotomy, the foot has ahind foot varus, she has pain over the old scar with a swelling in the same area, plan for revision of the mid foot osteotomy. Examine in theatre before surgery. 14/6/2018- c/o painful rt foot and hip. psoas sign equivocal. OA failure of fusion of the talonavicular. rt psoas abscess. plan: antibiotics, analgesics, r/v 3…
253	2014-05-22	2014-05-28	2009-05-20	5.02222		F	pallisa	15							Lt PIP foot	2012-01-01	2.61389	2.39167		quinine iM injection			22/5/2014- flexible varus deformity lt foot	22/5/2014- 5 years girl developed lt foot deformity. 2 years ago following quinien iM injection that has progressively worsened. Ros oval sores. Or: flexible varus deformity lt foot, tight achilles tendon with equinus. Dx: lt pip foot. Plan: lets do percut ATL 28/5/2014. admit 27/5/2014.	percutaneous achilles tendon lengthening		left	foot	elevate the foot, monitor blood supply to the toes. POP for 4 weeks, discharge tomorrow		26/6/2014- PIP achinless lengthening done. Foot plantegrade lets have some dorsiflexion. Plan manipulation and casting for 4 weeks then aFO mold on return. 29/7/2014- foot almost plantegrade. But still has varus. Reapply short leg walking cast fro 4 weeks. 26/8/2014- foot well corrected. plan mold and fit AFO. review after fitting. 29/8/2014- got AFO yesterday. lt foot semi rigid. plan: do daily …	AFO
254	2014-05-28	2014-06-02	2009-01-21	5.36389	10	M	Alebtong	15							Lt PIP								29/5/2014- left foot with midl equinus, heel varus and forefoot supinatus.	29/5/2014- PIP left foot with mild equinus, heel varus and forefoot supinatus. Plan: for percutaneous ATL on 2/6/2014.	percutaneous achilles tendon lengthening		left	foot	pop for 3 weeks then assess for tendon transfer later. Elevate left foot.		24/6/2014- afo fitted well. Plan: full time aFO donning for 8 weeks. See in 2 months. 28/8/2014- no more equinus. Tibialis anterior power 0/5 and posterior power 3/5. peroneii are also without power. Plan: continue with aFO. Review after 6/12. 17/11/2016- foot in slight equinus, plan: lets apply a below knee cast, full stretching. then measure an AFO next week. admit to the hostel. 29/11/2016- he…	AFO
255	2014-06-05	2014-06-11	2000-01-01	14.4444	19	F	oyam	36							PIP Rt foot										triple arthrodesis		right	foot	elevate the right foot. Wound inspection on 18/6/2014.		31/7/2014- completed 7/52 of casting, removed Pop today, wound has healed with stitches in situ. Painful ROM right ankle joint. Right foot is plantegrade. Plan: remove stitches. Wean off crutches gradually. r/v in 1/12 with new xrays. Rom exercises ankle joint. 11/9/2014- uncooperative, she doesn't want to do physio. has stiff ankle joint but foot is plantegrade though walks with some equinus. pl…	AFO
256	2014-02-13	2014-06-17	2009-01-01	5.46111	10	f	kampala	19							Rt PIP								13/2/2014- equinus, fore foot adduction and severe varus.	13/2/2014- rt foot deformity. Child has been living with mother, so father unsure of history of the problem. Oe: rt foot equinus, forefoot adduction and severe varus. Plan: m +c 1st then ATL. Use aFO later and to reassess whether pt will need an TAT transfer when foot is plantegrade. 27/2/104- M&C done. 6/3/2014- pt a flexible forefoot adduction mild varus and equinus. POP off today. plan: do a l…	TA tendon transfer. Transferred the insertion of the tibialis anterior tendon laterally to the lateral cuneiform bone.		right	foot	elevate the limb. Monitor the toes for circulation and swelling. Discharge when comfortable on POP for 6/52.		31/7/2014- off POP 6/52 post tendon transfer. Plan: provide AFO for day and night bracing. Review after 4/52. 4/9/2014- doing well with AFO. Plan: continue AFO for night tie only bracing. Review after 3/12.	AFO	elevate the limb. Monitor the toes for circulation and swelling. Discharge when comfortable on POP for 6/52.
257	2014-07-14	2014-07-15	2006-01-01	8.53889	13	F	kasese								Right PIP								14/7/2014- rigid equinus	14/7/2014- pIP right side. Foot in rigid equinus. Plan achilles lengthening.	percutaneous achilles tendon lengthening		right	foot	elevate the limb, treat as per drug chart, monitor circulation of the toes and for swelling. For remanipulation on 22/7/2014.		22/7/2014- manipulation and casting done. 21/8/2014- post aTL, pop off today, right foot is flexible and plantegrade. Plan: measure for aFO then reapply cast if not ready. r/v with AFO. 26/8/2014- doing well AFO well fitting. Plan: aFO for 4 months. review in 4 months. 4/12/2014- weakened TA/TP tendons. power=2 /5. plan: continue AFO for 4 months.	AFO
258	2014-04-29	2014-07-29	2010-01-22	4.51944	9	M	kampala	15							PIP right foot								29/4/2014- clubfoot	29/4/2014- neuropathic clubfoot. Tibialis anterior good. Plan serial manipulation and casting, then consider tendon transfer. 13/5/2014- m and c done.	TA tendon transfer. Through a lateral incision to the calcaneus performed a lateral closing wedge osteotomy to correct the heel varus. Also transferred the tibialis anterior tendon laterally to the middle cuneiform bone. Cleaned and closed.		right	foot	elevate the limb. Monitor the toes for swelling and circulation. Treat as per drug chart.		17/6/2014- foot still needs manipulation and casting 2 weekly. Review in 4 weeks. 22/7/2014- plan tibialis anterior tendon transfer and calcaneal osteotomy. 11/9/2014- 6 week post surgery. Plan: cast off today. Let him start using an AFO for 4 months. review in 1 month. 13/11/2014- he is using aFO, foot still in varus. plan: continue AFO for 3 months.	AFO
259	2014-08-01	2014-08-04	2004-08-01	10.0083	14	M	kibaale	20							PIP right foot	2009-01-01	4.41667	5.58333		IM injection		malaria	1/8/2014- equinus	1/8/2014- h/o IM treatment for malaria at 5yrs of age and sustained paralysis of right lower limb with residual equinus due to tight tendoachilles and flexible forefoot adduction. Plan: meanwhile apply cast after remanipulation. For ATL on Monday 4/8/2014.	percutaneous ATL + I&D. fractional achilles tenotomy done percutaneously and equinus corrected then a below knee cast applied with the foot in plantegrade position.		left	foot	for remanipulation on next Monday 8/4/2014 in theatre		16/9/2014- 6 post fractional ATL lt cast off today: foot good position. Plan: to workshop for AFO measurement molding and eventual fitting. See with aFO fitted. Re cast foot meanwhile.	AFO	1/8/2014- trained ambulation using crutches.
260	2014-07-17	2014-08-06	2004-01-07	10.5806		M	koboko								Rt foot PIP									23/7/2014- soft tissue release done. 30/7/2014- manipulation and casting done.	percutaneous ATL		right	foot	elevate right foot. POP for 3 weeks		4/9/2014- post STR right foot. Wounds have no healed fully, but clean, still has stitches. Right foot is plantegrade. Plan: measure for aFO then wound care and re apply if aFO not ready. r/v with aFO.	AFO	24/7/2014- gait training
261	2014-08-08	2014-08-11	2011-04-01	3.36111		M	wakiso	11							? PIP Left foot	2012-07-01	1.25	2.10278				febrile illness	8/8/2014- equinus left foot	8/8/2014- complains fo deformity of left foot since 7/12, history unclear, represented by grandmother but reports history of febrile illness during infancy and delayed motor milestones. Clinically: equinus left foot with tight tendoachilles. Plan: for aTL on monday.	percutaneous achilles tendon lengthening		left	foot	give analgesics, elevate the limb, pOP for four weeks		9/9/214- 4 weeks post aTL lt foot cast off today. Foot good position. Plan: to workshop for aFO measurement, molding and fitting. See with aFO fitted. Re-cast the foot meanwhile.	AFO
262	2014-07-31	2014-08-11	2002-01-01	12.6111		M	masaka	36							Equinus Lt in PIP					I injection			31/7/2014- flexible equinus deformity lt foot	31/7/2014- c/o limping while walking since early childhood with associated planter glexion of the lt foot and on and off pain in the calf muscles. h/O IM injection. OE: flexible equinus deformity lt foot. Plan: PT. atl on 4/8/2014.	percutaneous achilles tendon lengthening		left	foot	monitor toe circulation. Elevate limb. Remanipulate 18/8/2014.		16/9/2014- doing well, no crutches. Plan: cast off, measure aFO. Review with afo.	AFO	13/8/2014- first consultation. Able to stand and walk with support. Left foot in POP cast post ATL. Rx: walking exercises with crutches.
263	2014-08-12	2014-08-15	2004-10-10	9.84722		F	mukono	25							Equinus deformity Lt foot secondary									12/8/2014- c/o left foot deformity. Gradual onset of left foot deformity and weakness for the ast 2 years. Taken to kawolo hospital and PT was done along with casting but no improvement. Pmh: unremarkable. Oe: ggc. Dx: pIP left foot. Plan: tendon transfer.	TP tendon transfer. Through media incision detached the posterior tibialis from its insertion and reinserted it on the cuboid laterally, closed wounds with vicryl 2/0.		left	foot	monitor toe circulation. Analgesia as prescribed. Elevate the limb.		16/9/2014- lets measure an AFO. Review with AFO. 19/9/2014- has AFO. Stitch abscess. Remove stitches. aFO day and night. 3/10/2014- transferred tendon is active with some dorsiflexion. Still uses AFO. Plan: use AFO day and night. R/V in 3/12. 28/1/2015- foot is plantegrade. plan: aFO day only r/v 28/4/2015. 30/4/2015- doing well with aFO. continue with day use of brace. review in 3 month. 18/8/20…	AFO	18/8/2014- first consultation. Post tendon transfer with POP cast. Rx: walking exercises with crutches. Able to walk well with crutches. Plan: 1) issued crutches. 2) discharge from ward. 3) review next visit.
264	2014-08-11	2014-08-20	2008-01-01	6.63611		F	mbale	19							PIP Rt foot	2010-01-01	2	4.61111		IM gluteal injection			11/8/2014- equinus foot in extension	11/8/2014-progressive deformation of the rt foot x 4 years. Preceded by IM injection rt gluteus, developed progressive weakness later deformity of the rt foot. Has been undergoing PT and use of aFO for the last 3 years. OE: slapping gait, equinus foot in extension, strong TP function 5/5/ weak/absent TA. plan: will benefit from TPT on 18/8/2014. admit on 11/8/2014.	TP tendon transfer. Three incision step tendon transfer of tibialis posterior transfer laterally to the cuboid, fixed with 2/0 ethibond. Foot in good position, closed all incisions and applied a short leg cast, foot well perfused.		right	foot	elevate foot. Drugs as per medicine sheet. Split cast PRN. Will keep cast for 6 weeks.		2/10/2014- post tendon transfer. Plan: avail aFOs, review with aFOs, review in 2 months.	AFO	21/8/2014- ambulation training done. Crutches provided.
265	2011-08-16	2014-08-22	2008-03-09	6.45278		F	wakiso								PIP Rt								16/8/2011- foot drop with forefoot adductus, no equinus.	16/8/2011- rt foot drop with Forefoot adductus following pIP. Is currently using afo. Oe: walks with rt foot drop and forefoot adductus. Has no equinus. Tib anterior and peroneii muscles power 0/5. tib posterior power 5/5/. Plan: for tendon transfer at later stage. meanwhile continue with AFO. rv after 6/12. 23/2/2012- still has pes EVS result of PIP. using aFO. now has equinus. plan for percutan…	TA tendon transfer. Transferred the insertion of the tibialis anterior tendon laterally to the medial cuneiform bone.		right	foot	elevate the limb. Monitor the toes for circulation and swelling. Discharge when comfortable on POP for 6/52.		2/10/2014- just off POP. Plan: remove stitches. Provide AFO. Review after 4/52 with the AFO. 30/10/2014- rt foot plantegrade with mild varus deformities. Transferred tendo is active- plan: continue exercises aFO use day and night. Review in 3/12 on 30/1/15.	AFO
266	2014-08-26	2014-08-29	2007-03-01	7.49444		F	mbale	23							PIP with equinus rt foot	2008-01-01	0.833333	6.65278		quinine injection			26/8/2014- equinus deformity	26/8/2014- c/o rt foot deformity. Had a quinine injection at 1 year of age, the followed by progressive deformity of the foot. pMH unremarkable. OE: equinus deformity of the right foot with tight achilles tendon. Plan: for percutaneous achilles tendon lengthening right foot 29/8/2014.	percutaneous achilles tendon lengthening		right	heel	elevate the limb, monitor toe circulation and for excessive swellings: split cast if limb funciton, compromising, analgesics as per medicine chart, for remanipulation next Friday 5/9/2014.		10/11/2014- post ATL foot plantar grade. AFO fitting fine. Plan: AFO day and night. Review in 3 months.	AFO	8/9/2014- first consultation: oE: has pOP on right leg. Rx: walking exs. Walking well. Plan: 1) D/C 2) keep POP for 4/52. 3) review in 4/52.
267	2014-08-27	2014-09-02	2010-04-22	4.36111		F	mayuge								Rt PIP					IM gluteal injection			28/8/2014- equinus	28/8/2014- equinus rt side following IM gluteal injection. Plan: percutaneous ATL as first stage followed by reassessment for possible tendon transfer. Surgery on 2/9/2014.	percutaneous achilles tendon lengthening		right	foot	elevate the limb. Monitor the toes for swelling and circulation. Treat as per drug chart. pOP cast for 4/52.		2/10/2014- POP off today rt foot position- plantegrade. PLn: measure for aFO then re apply POP if not ready. R/V with AFO. 11/12/2014- still has weakness of TA/TP tendons, foot plantegrade. Plan: continue using AFO for 3 months, day and night. 11/3/2015- walks well with the aFO. without the AFO, the foot drop is apparent but no deformity. plan: continue with the aFO. review after 6/12.	AFO	3/9/2014- seen and provided with wooden crutches 29" and a cast tyre. Taught on ambulation with crutches but she is not yet stable.
268	2014-09-08	2014-09-09	2009-06-05	5.26111	10	F	kaberamaido	13							right foot PIP	2010-02-01	0.655556	4.60278				febrile illness	8/9/2014- equinovarus	8/9/2014- injection due to due febrile illness at 8 months, casting was done in soroti and there is a slight improvement. Foot in equinovarus. Plan: for aTL then easure AFO,.	percutaneous achilles tendon lengthening		right	foot	elevate the limb. Treat as per drug chart. Monitor the toes for swelling and circulation.		10/10/2014- removed pOP today. Rt foot position is good. Plan: measure for aFO, if not ready re-apply cast then r/v with AFO.	AFO	10/9/2014- first consultation. Has POP right leg. Rx: walking exs in parallel bars. Able to walk with support holdig with one arm. Should be able to walk tomorrow without support. No need for crutches.
269	2014-09-15	2014-09-19	2000-07-01	14.2167		F	kampala	50							PIP rt foot	2012-01-01	11.5	2.70556					15/9/2014- equinovarus deformity	15/9/2014- PIP for 2 years, walks on the outer border of the right foot. Clinically: equinovarus deformity. Plan: for triple arthrodesis.	triple arthrodesis		right	foot	elevate the limb and monitor for swelling and perfusion. Analgesics and antibiotics see med chart. Wound inspection and cast change on 26/9/2014		6/11/2014- post triple arthrodesis. POP off after 6.5 weeks of casting plan: cap ampiclox 500 mg qid 5/7. wound care. Measure for aFO and re apply POP. Review with aFO. 11/112014- wound yet to heal. Plan apply a healing cast.	AFO	22/9/2014-crutches provided.
270	2014-09-23	2014-10-07	2007-01-01	7.76667	12	M	kampala	19							PIP Rt foot + Pyomyositis Rt				2009	IM gluteal injection			23/9/2014- equinovarus deformity.	23/9/2014- progressive deformity lt leg x 5 years. Preceded by injections into the lt gluteus muscles. Never had any formal treatment. 5 days ago developed pain in the same thigh no h/o fall no fevers. OE: equinovarus deformity, walks on latearl border foot. tenderness mid thigh much warmr than contralateral side. get CBC: WBC total 17.3 x 10*3. Hb 8.3 g/dl. plan: ampiclox: 500 mg tds x 5 days. b…	percutaneous achilles tendon lengthening		left	foot	elevate the limb. Treat as per drug chart. Monitor the toes for circulation and swelling. Discharge when comfortable on POP for 4/52.		26/11/2014- measure for AFO then reapply cast. Review with AFO	AFO
271	2014-10-02	2014-10-13	2004-05-25	10.3833	15	m	iganga	24							Right PIP					im gluteal injection			10/5/2016- severe pes equinovarus supinatis rt side	2/10/2014- PIP rt foot, plan : triple arthrodesis on 13/10. consent. 7/10/2014- re manipulation done 4 weeks post ATL. Plan: maintain cast for 4/52.	triple arthrodesis		right	foot	elevate right foot. Remanipulation 20/10/14		25/11/2014- off cast today, foto looking good. Plan: measure for AFO. Afo for 3 months. Review in 3 months. 28/ 1/2015- doing well, walks almost normally. Plan: review after 6/12. 28/7/2015- is in a good general condition, been wearing the AFO at night plan: stop AFO, review after 2 months. 27/10/2015- two months without AFO, reports no pain, no complaints. o/e: foot in good position. plan: lets …	AFO	2/10/2014- availed crutches. Ambulated with crutches. Precautions explained.
272	2014-10-08	2014-10-13	2009-10-03	5.02778	9	f	masaka								Rt PIP					gluteal iM injection			8/10/2014- pes equinovarus supinatus	8/10/2014- rt pes equinovarus supinatus following gluteal IM injection. Muscle power not assessed, child not following the instructions. Plan: for percutaneous achilles tendon lengthening on 13/10/2014.	percutaneous achilles tendon lengthening		right	foot	monitor toe circulation. Elevate limb. Maintain cast for 6 weeks. Provide NWB crutches. Treatment as per chart.		11/11/2014- measure an aFO. Use aFO for 4 months. Review in 4 months.	AFO
273	2011-02-03	2014-10-17	2006-01-01	8.79444	13	F	mukono								Rt PIP								3/2/2011- equinovarus	3/2/2011- child with PIP of rt foot in equinovarus. TP power 5. 10/1/2012- equinovarus supinatus rt foot. The foot is flexible, with good abduction. Dx: PIP rt foot. Plan: for aTL and POP, then POP. Later on reevaluate for possible tendon transfer. 21/2/2012- pOp removed today. the foot is flexible. it can go easily beyond neutral. plan: for O/W staff to review and provide AFO.	percutaneous achilles tendon lengthening		right	foot	monitor for toe-circulation maintain cast for 6 weeks, treat as per chart.		16/10/2014- she comes back for relapse of the deformity. The foot isequinus-varus supinatus. The child walks on the anterior border of the foot. Flexion deformity of the toes. Dx: PIP rt foot (relapse). Rx: for aTL and POP, first step. Later on triple arthrodesis is indicated. 3/12/2014- cast off yesterday. foot flexible. plan: measure for AFO. aFO for 4 months.	AFO	20/10/2014- crutches provided, ambulation training with crutches done. 7/4/2015- did dorsiflexion-eversion manipulations of the rt foot. Home program done.
274	2014-11-10	2014-11-14	2011-08-28	3.21111	7	F	kampala	35							PIP	2012-01-01	0.341667	2.85833		IM injection			10/11/2014- equinovarus	10/11/2014- c/o righ foot deformity. Was given an IM injection at 1 yo and the foot gradually became deformed. PMH: no other known chronic illness, no known allergies. o/e: equinovarus deformity right foot with tight achilles. Plan: aTL on.	percutaneous achilles tendon lengthening		right	foot	monitor toe circulation, treat as per chart, for remanipulation next week		6/1/2015- off POP today. Plan to ortho workshop for aFO measurement. Wear aFO full time. Review after 2/12. 5/3/2015- foot looks fine, continue with aSFO. 18/3/2015- developed a pressure ulcer on the back of the heel due to the AFO. Plan: daily dressing of teh wound. withhold teh aFO for now. review after 4/52.	AFO	17/11/2014- gait training PWB done.
275	2012-01-10	2014-11-18	2003-01-01	11.8806	16	F	mubende	31							PIP Rt foot								30/11/2010- equinus varus supinatus.	30/11/2010- deformity of rt fot (equinus-varus-supinatus), apparently no active muscles. Poor conditions of the skin and nails of the toes. Dx: PIP rt foot. Plan: toilette of the toes and nails as first step, then ATL and POP (first phase). 7/12/2010- admit for surgery tomorrow. do HB. 10/1/2012- no major complaints, doing well on aFO, the foot drop is mild. tibialis anteriro and peroneii are pow…	burns contracture release and FTSG		right	foot	analgesia, check graft in 5 days Monday 24/11/2014		16/12/2014- wounds have all healed and still has k wires in situ. Plan: do x ray right foot then r/v. alignment is good. Continue with AFO. K wire removal. R/V in 1/12.	AFO	25/1/2018- ambulation on crutches		29/8/2017- book for triple arthrodesis but reapply the cast in the meantime	2018-02-24	triple arthrodesis
276	2014-10-20	2014-11-20	2002-01-01	12.8861	17	F	wakiso	44							PIP Lt foot								20/10/2014- equinovaro supinatus foot	20/10/2014- deformity of left foot, following an injection at tender age on exam. Deformity of the foot (equino varo supinatus), deformity of the hallux (loss of nail). There is a septic ulcer in the areas of sinus tarsi, another ulcer in the medial aspect of the ipsilateral thigh. D: PIP lt foot. plan: for triple arthrodesis (when ski is ok) class 3. cloxacillin 250 mg qid for 7/7. provide crutc…	percutaneous achilles tendon lengthening		right	foot	tire shoe, crutches and review in 2 weeks for manipulation and casting in OPD		3/11/2014- skin much better. Plan letes give it 2 more weeks befroe srugery. 18/11/2014- book for triple arthrodesis. 8/12/2014- MXC of the foot, manipulate the foot in dorsiflexion- eversion. Rx: provide POP tyre. POP for 4/52. control in 4/52 re-evaluation and AFO. 19/1/2015- foot well corrected. fit AFO when ready. continue with AFO. 28/4/2015- has not been using AFO well so the deformity has …	AFO	20/10/2014- crutch walking trained NWB lt foot
277	2014-11-28	2014-12-12	2007-09-13	7.24722	11	M	wakiso								Rt PIP	2013-02-01	5.38333	1.825		IM injection		afebrile illness		28/11/2014- c/o deformity rt foot since 2/2013. 2 degrees to IM injection for afebrile illness. Paralysis of rt ll and eventual deformity but flexible with tight tendon achilles wasting of rt leg muscles. DX: rt PIP. Plan: do M+ C today, booked for percut ATL on 5/12/14. admit on 4/12/14.	percutaneous achilles tendon lengthening		right	foot	monitor toe circulation, elevate limb, analgesia as prescribed, remanipulate on Wednesday.		23/1/2015- POP off today. Right foot position is good. Plan: get AFO from orthopaedic workshop then review. If not ready, re apply POP. 16/6/2015- has been on day and night bracing for 2 months. OE: has some mild foot drop, also need mild inversion of foot, plan continue day and night bracing x 2/12. 3/9/2015- doing well on aFO. still has foto drop. plan: continue with the FO during the day only.…	AFO
278	2014-08-13	2014-12-15	2003-06-02	11.5361	16	F	kampala	43	159						PIP Rt calcaneal varus								13/8/2014- calcaneal varus	13/8/2014- progressive deformity rt foot since childhood. Recurrent Rt ankle and foot pain 3 years now. OE: hindfoot and ankle varus, mild forefoot adductus, strong TP and TA functions. Imp: pIP rt calcaneal varus. Plan: will benefit from calcaneal swing osteotomy to realign the hindfoot subject to parents consent when ready. booked surgery on 15/12/14.	calcaneal osteotomy. Using a horizontal incision over the lateral calcaneus right foot, retracted the peronei upwards to expose the calcaneus. Performed a closing wedge osteotomy to correct the calcaneal varus deformity. Stabilized with 2 k- wires. performed a plantar fasciotomy to correct the cavus.		right	foot	elevate right foot. Do check xray right foot AP n lat. Cast change on 5/1/15. Pop for 6 weeks.		28/1/2015- 6/52 post calcaneal osteotomy rt side. Plan: remove K wire. Reapply pop boot for 4/52 more. r/v after 4/52 for pop removal. 25/3/ 2015. the wound is almost closed, c/o some mild pain in the rt heel. Plan: can discard the crutches when comfortable. review after 6/12 for control. control with wound care. 6/5/2015- the wound has healed. only mild pain on walking, the heel is well aligned.…	ANKLE brace
279	2014-09-04	2015-01-09	1999-01-01	16.0222	20	F	kampala	44							PIP right foot with discharging sinus					IM gluteal injection			4/9/2014- cavovarus and slight equinus with varus calcaneus	4/9/2014- injected in the right buttock and sustained a weakness in the lower limb. Associated with a cavovarus deformity and slight equinus with varus calcaneus clinically: weak TA/ TP tendons. Muscle wasting, plan: will benefit from triple arthrodesis of the right foot in the dec holidays.	triple arthrodesis		right	foot	abx and analg as per chart, elevate the limb, for wound inspection and remanipulation next Friday.		16/1/2015- manipulation and casting. 23/1/2015- manipulation and casting. 6/3/2015- doing well, wounds clean. Plan: measure for an aFO. Review with an aFO. 11/6/2015- wounds healed, k wire removed, remove stitches. AFO night. Review after 3 months. 20/8/2015- she is c/o pain in the right foot, she has a discharging sinus of the foot. she walks with a slight drop foot, foot in a slight cavus but n…	AFO	12/1/2015- ambulation training done NWB rt lower limb. Crutches provided.
280	2015-01-07	2015-01-12	2008-05-11	6.66944	11	M	isingiro	19							Rt equinus in PIP								8/1/2015- pes equinovarus supinatus	8/1/2015- rt pes equinovarus supinatus in pIP. Plan: for percutaneous achilles tendon lengthening on 12/1/2015	percutaneous achilles tendon lengthening		right	foot	treat as per chart. For remanipulation next week Monday 19/2/15 in theatre. Monitor for circulation				20/1/2015- trined how to walk using crtuches issued crutches
281	2015-01-07	2015-01-12	2007-12-22	7.05556	11	F	ibanda	21							Rt equinus in PIP								8/1/2015- equinovarus supinatus	8/1/2015- rt pes equinovarus supinatus in pIP. Plan: for percutaneous achilles tendon lengthening on 12/1/2015	percutaneous achilles tendon lengthening		right	foot	treat as per chart. For remanipulation on mon 19/1/15 in theatre		26/6/2018- still has a foot drop. Was using AFO but now apparently old. Plan: avail an aFO rt side for daytime use. Review after 6/12 for clinical control. 16/1/2019- no equinus. Mild flexible adductus and heel varus. Plan: aFO for night only. Closed shoes for daytime use. review after 6/12 for clinical control.	afo	20/1/2015- rx: issued crutches and gait training PWB done.
282	2015-01-05	2015-01-12	2003-02-01	11.9472	16	M	buikwe	26							PIP Rt foot	2010-01-01	6.91667	5.01111		quinine injection			5/1/2015- equinus varus supination	5/1/2015- quinine injection 5 years back, followed by deformity of rt foot, no hx given. Oe: equinus arus supinates foot. Good activity of TA. Dx: PIP rt foot. Plan: 1st step: ATL + POP on 12/1/15. then 2nd step-TA tendon transfer later.	percutaneous achilles tendon lengthening		right	foot	treat as per chart. For remanipulation on Monday 19/1/15 in theatre.		16/2/2015- foot getting better, plan recast, keep cast for 2 weeks and review. Will be candidate for tendon transfer. 3/3/2015- foot plantegrade. Plan recast. See in 2 weeks for molding and fitting AFO. 17/3/2015- started AFO today. Plan: aFO day and night 2/12. r/v 22/5/2015. 19/6/2015- needs tibialis anterior tendon transfer laterally. schedule during holidays. workshop to repair AFO.	AFO	13/1/2015- ambulation training using crutches done. Patient is stable with crutches.
283	2015-01-07	2015-01-13	2002-02-23	12.8889	17	F	kampala	45							Rt PIP								7/1/2015- mild equinus rt foot in PIP	7/1/2015- mild equinus rt foot in PIP. Plan: for percutaneous ATL on 13/1/2015	percutaneous achilles tendon lengthening		right	foot	elevate the limb, treat as per drug chart. Monitor the toes for circulation and swelling. Discharge when comfortable on POP for 4/52.		10/2/2015- for measurement of an AFO. Reivew with the aFO. 21/4/2015- rt foot plantegrade. Repair AFO in workshop. Continue bracing. 2/9/2015- doing well. No complaint. No equinus. Very mild heel varus. Plan: r/v in case of need.	AFO	14/1/2015- ambulation training using crutches done. Crutches provided.
284	2014-12-02	2015-01-16	2008-01-01	7.04167	11	M	kamuli								Lt foot PIP	2013-01-01	5	1.91944		IIM injection		febrile illness	3/12/2014- equino varus with cavus with achilles tendon tight	3/12/2014- reports progressive deformity of the lt foot following an IM injection about a year prior for a febrile illness. Initially well no known chronic illnesses on long term medication. OE: fgc afebrile. Lt foot in equino varus with cavus with achilles tendon tight. muscle bulk preserved, sensation intact. imp: lt foot pIP. plan: book for STR lt foot.	percutaneous achilles tendon lengthening		left	foot	elevate the foot, monitor blood supply to the toes. Provide a pair of crutches. Discharge today afternoon, remanipulation on 23/1/2015.		8/4/2015- cast off today. OE: weak tibialis and peronei functions. Foot plantegrade but with residual adductus deformity. Plan: send to workshop for aFO measurements, molding and fitting. Reapply short leg cast. See with aFO fitted. Nice fitting AFO. Use day and night and review in 3 months. 22/7/2015- reports deformity recurring and the aFO got spoilted some months back. OE: aFO destroyed, hindf…	AFO	19/1/2015- crutches and tyre shoe provided. Precautions given, crutch walking taught. 27/1/2015- review. Instructed how to use POP tyre. Able to walk without crutches. No need for crutches. C/O fever x 1/7. unwell since yesterday. Plan: B/S for MPS. review by MO.
285	2014-01-23	2015-01-21	2010-07-28	4.48056	8	F	mbarara								PIP Lt foot								cavo-varus deformity	25/2/2014- foot quite brace. Take mold for AFO and fit. Will reevaluate for possible tendon transfer. 26/2/2014- TPT was not done, instead manipulation and casting done. POP off now brought AFO. OE: AFO fitting well. Plan: adherence to use and care of aFO. see in 8 weeks for clinical control. 24/4/2014- child is wearing AFO, he has cavo-varus deformity, with no equinism. there is active movement …	TP tendon transfer. Harvested tibialis posterior from its attachment at the navicular, retracted it at its tendo-muscular junction, through interossei membrane, transferred it to the cuboid bone and transfixed at the plantar surface with button and cushion.		left	foot	POP for 6 weeks. Elevate left lower limb.		4/3/2015- 6/52 post tendon transfer. Off POP today. Wounds have healed. Plan: provide aFO. Review after 4/52 with the aFO.	AFO	22/1/2015- did ambulation on parallel bars, then crutches
286	2015-01-27	2015-02-02	2006-11-01	8.25278	12	F	kampala	25							? PIP, poliomyelitis	2010-01-01	3.16667	5.07222					27/1/2015- equinus	27/1/2015- pt unable to use rt lower limb for now 5 years following an iM injection. Reports progressive shortening of the limb, initially had a shoe raise from katalemwa but has since outgrown it. Was later abandoned by the mother, now stays with grand mother. oe: ambulates with both hands and the lt lower limb on the ground. severe wasting of all muscle groups of the rt ll. flexion contracture …	manipulation and casting		right	knee	elevate the limb. PT, ambulation exercises as soon as comfortable. Keep POP for 2/52 then KAFO.		17/2/2015- foot is plantegrade. plan: provide KAFO. 21/4/2015- review patient with KAFO and shoe raise. Mother reports child much better, doing well at school. Oe: wasted muscle bulk rt LL, flexible knee and hip rt. Ambulating with a pair of crutches. plan: continue with KAFO. review in 2/12. 2/2/2016- grandma reports child has occasional pain after walking/ playing at school. OE: rt hip hypermob…	AFO	27/1/2015- crutches provided. Crutch walking taught, precautions given. Stable with crutches. 10/4/2015- availed crutches size 39. precautions of use explained.
287	2015-01-09	2015-02-04	2006-07-28	8.51667	12	M	Wakiso	26							PIP Rt	2011-01-01	4.425	4.02222					9/1/2015- equinus cavus and forefoot adduction.	9/1/2015- history of iM injection rt buttock 4 years ago. Developed paralysis of the rt leg with eventual deformity of rt leg. Clinically: walks with a rt foot drop, equinus cavus and forefoot adduction, semi rigid. TAT 3-4/5. TPT- active. DX: rt PIP. plan: lets do M and C. x 2/then give AFO then review. 22/1/2015- booked for TPT transfer on 4/2/15. admit on ward on 3/2/15. meanwhile apply POP.	TP tendon transfer. Identified and ligated the TP tendon from its insertion, retracted the tendon via a distal tibial incision, made an incision over the lateral cuneiform, made a tunnel to track the tendon, drilled a hole in the lateral cuneiform, secured the tendon in the lateral cuneiform with sutures and a button with a cushion, foot in good position, closure in layers, applied a below knee c…		right	foot	abx and analg as per chart. Elevate the limb. POP for 7 weeks, meawhile, avail crutches and wa walking tyre		31/3/2015- the cast is off today. Plan: measure an AFO. Review with AFO.	AFO	9/1/2015- trained how to walk using crutches. Issued crutches.
288	2015-01-05	2015-02-13	2007-01-01	8.11667	12	M	Kampala	24							PIP Rt foot					quinine IM injection			5/1/2015- equinus cavus mild varus	5/1/2015- deformed rt foot since childhood. History of IM injection of quinine. Clinically: ambulate with rt foot drop wasted rt calf. Equiuns cavus mild varus. Post ATL sear rt foot semi rigid. DX: rt PIP. Plan: stretch + pop for 2-3 times then book for ATL and plantar fasciatomy. 5/2/2015- has been on serial manipulations and casting. plan: for percutaneous ATL on friday 13/2/2015.	percutaneous achilles tendon lengthening		right	foot	elevate foot. Remanipulation on 20/2/2015		31/3/2015- lets remove the cast. Measure for aFO. Review with aFO.	AFO
289	2015-02-03	2015-02-13	2005-01-01	10.1167	14	M	shema	29							Right PIP	2009-01-01	4	6.08889					3/2/2015- severe equinovarus	3/2/2015- right PIP developed 6 years ago, now has a deformity of the right foot, he has a severe equinovarus deformity of the right foot. Plan: apply a below knee cast of the right foot, then admit for ATL on Friday 13th.	percutaneous achilles tendon lengthening		right	ankle	for remanipulation next week 20/2/15. discharge in the afternoon on analgesics.				3/2/2015- ambulation training done using crutches. Stable with crutches. Issued crutches.
290	2015-01-20	2015-02-18	2006-01-01	9.13056	13	F	Jinja	24							Rt foot PIP	2006-07-01	0.5	8.55278		IM injection quinine		febrile illness		20/1/2015- c/o deformity of rt foot x 8 years. Started following an IM injectio of QNN for a febrile illness at 7/12 of age. Mother reports h/o manipulation and casting for 3 weeks in jinja hospital with no improvement. Slightly reduced muscle bulk on the rt lower limb. imp: rt pip. plan: serial manipulation and casting. aTL afterwards. manipulation and casting done. TCA on 29/1/2015. 29/1/2015- …	percutaneous achilles tendon lengthening		right	foot	elevate limb, monitor toe circulation, analgesia as prescribed, remanipulation next Wednesday		25/2/2015- manipulation and casting done. 31/7/2015- tendon transfer done.		20/1/2015- walking training using crutches done, issued crutches. 19/2/2015- tyre provided.
291	2015-01-13	2015-02-27	2005-01-01	10.1556	14	F	mukono								Rt foot PIP					IM injection		febrile illness	13/1/2015- equino varus deformity.	13/1/2015- complains of deformity of the rt foot for years following an IM injection for a febrile illness. No known chronic medical illnesses, no prior h/o trauma, no family history of similar presentation. Oe: ggc, ambulant, rt equion varus deformity. achilles tendon tight. imp: rt foot pIP. for serial M+c, review when foot better. 20/1/2015- manipulation and casting done. plan: TCA on 3/2/2015	manipulation and casting		right	foot	elevate the limb, treat as per drug chart, monitorthe toes for circulation and swelling. Discharge home on POP for 4/52.				13/2/2015- availed crutches for ambulation; precautions explained.
292	2015-03-02	2015-03-06	2003-12-05	11.2528	15	F	amuria	27							Lt PIP								2/3/2015- equinus deformity	2/3/2015- PIP ith equinus deformity. No useful motor function. Plan: aTL then aFO on Friday.	percutaneous achilles tendon lengthening		left	foot	elevation, to maintain POP for 4 weeks		22/4/2015- just off POP today. Plan: provide aFO for full time bracing. R/V after 4/52 with aFO. 6/5/2015- c/o pain at the knee and ankle. Plan: workshop to modify aFO. Continue with night time bracing x 2/12	AFO	9/3/2015- seen the patient. Rx: trained ambulation using axillary crutches. Issued a rubber tyre.
293	2015-03-02	2015-03-09	2007-01-25	8.12222	12	M	amuria	23							Gluteal fibrosis & Lt PIP					quinine injection				2/3/2015- difficulty sitting, squatting, walking. h/o quinine injection. Clinically for gluteal fibrosis. Plan: gluteal release on 9/3/15.	release of gluteal fibrosis		bilateral	buttock	abx and analg as per chart. Start physio ASAP		13/5/2015- post bilateral gluteal releases. Father reports marked improvement. OE: able to squat though with slight instability. Plan: continue PT exercises.		10/3/2015- started sitting, bending, and squatting exercises. Did stretching exercises hips. 11/3/2015- sitting, bending, squatting exercises. Stretching and mobilization hips. 12/3/2015- seen the pt, continued with bending, squatting, and sitting exercises plus hip mobilization exercises. 13/3/2015- timothy shows a great improvement, he is able to bend, with less difficult. rx: continued with be…
294	2015-03-02	2015-03-13	2005-03-01	10.0333	14	F	amuria	34							Rt PIP with gluteal fibrosis									2/3/2015- PIP with gluteal fibrosis, ulcers on rt foot with PIP. Plan: cast right foot (healing cast). Gluteal release next week, Wednesday 11/3/15.	achilles tenotomy. Percutaneous achilles tenotomy with significant equinocavovarus correction, applied cast. Foot well perfused.		right	ankle	for remanipulation next Friday in theatre. Drugs as per medicine sheet, a pair of crutches, NWB		16/4/2015- post ATL, cast is off today, foot is dark, plan avail with an aFO, review in 2 months.	AFO	2/3/2015- ambulation training done, crutches provided
295	2014-03-11	2015-03-17	2010-03-23	4.98333	9	M	wakiso								PIP right foot	2012-01-01	1.77222	2.19444						11/3/2014- history of injection 2 years ago, clinically mild club foot, no useful muscle for transfer currently. Plan: serial manipulation and casting weekly for two weeks then fit aFO. 1/4/2014- cast is totally destroyed, plan: cast change. Measure for aFO. r/v with aFO. 11/11/2014- walks with a drop foot. foot in varus, has got some power in the TP tendon. plan: for split TP tendon transfer lat…	TP tendon transfer. Performed a percutaneous leghtening of the achilles tendon. Transferred the insertion of the tibialis posterior tendon laterally to the cuneiform.		right	foot	elevate the limb, treat as per drug chart. Discharge when comfortable on POP for 6/52.		23/4/2015- has wound at site of button. plan: fit aFO. dress wounds daily + cloxacillin, review with aFO. 1/6/2015- post tendon transfer. Foot frail and transferred tendon not functional. Plan aFO. 2/7/2015- walks with a slight drop foot. Plan:a vail an aFO, continue with aFO, review in 4 months.	AFO	19/3/2015- seen and started on ambulation with crutches, he is not yet stable. Advised mother on hwo to support him while at home. Issued crutches and POP tyre. 5/11/2015- seen patient and noted h/o condition. No h/o physio/conservative management before surgical management. mother reports that use of aFO has been very inconsistent because child disliked it. oe: full passive rOM ankle and subtala…
296	2015-03-02	2015-03-19	2006-11-02	8.38056	12	M	amuria	25							Lt PIP									2/3/2015- pIP lt foot with supination deformity and hindfoot varus. Plan: serial casting x 2 (weekly) then either tendon transfer or mid-foot/mid tarsal osteotomy. 10/3/2015- manipulation and castign done. TCA on 17/3/15. 17/3/2015- major deformity is supination. plan midfoot osteotomy.	triple arthrodesis		right	foot	elevate, dugs as per medicine sheet, keep cast for 5 weeks unless soiled		18/6/2015- plan: remove pins. cap cloxa 250 mg qid 2/52. 19/6/2015- k wire just removed yesterday, has never returned since surgery. Foot swollen, pin tract infection, plan apply splint in corrected position, admit hostel, elevate, antibiotics and review monday in clinic, 22/6/2015- swelling much less, foot soft, plan convert to shor tleg cast for 6 weeks.	short leg cast	2/3/2015- ambulation training done, crutches provided
297	2015-03-09	2015-03-19	2011-04-03	3.96111	8	M	tororo	13							PIP								equinus		percutaneous achilles tendon lengthening		right	foot	elevate the foot. Treat as per chart. Remanipulation in 1/52.		17/3/2015- PIP with equinus deformity. Has been having serial casting. Needs tenotomy. 27/3/2015- manipulation and casting done.
298	2015-03-05	2015-03-26	1999-05-05	15.8917	20	M	mitooma	38							PIP right foot								severe equinovarus	6/3/2015- right sided weakness, he also developed a severe equinovarus of the right foot. The foot is rigid. Plan: apply a below knee cast of the right foot serially and will require triple arthrodesis soon. 12/3/2015- manipulation and casting done. R/v by ortho surgeon on 19/3/2015.	achilles tendon lengthening		right	foot	drugs as per medicine sheet, tire shoe. Remanipulation next week in OPD before discharge, may transfer to hostel		30/4/2015- off the cast today. Plan: avail an AFO, review with the AFO.	AFO	6/3/2015- issued axillary crutches, precautions given. 27/3/2015- rx: knee mobilization exs, taught inner range quad strengthening exs 10 rep/ 3 day, gait training with PWB, 3 pt with crutches. Training transfers sit-stand, stand-sit. Advised to continue ambulation and exs.
299	2015-03-19	2015-03-30	2005-02-20	10.1111	14	F	kalungu	25							PIP left foot								20/3/2015- drop foot	20/3/2015- PIP left foot, was managed by tendon transfer but did not correct well. Still has a drop foot with the toes in flexion. The foot is flexible till plantegrade. X ray, plan: will require triple arthrodesis of the left foot. Admit 29th.	percutaneous achilles tendon lengthening		left	foot			27/4/2015- cast off today. No major issues. OE: foot good position, has 4th web space infection. Plan: to workshop for aFO measurement molding and fitting when ready. Ampclox 250 mg tds x 7 days. 30/6/2015- today: noted some foot drop. Foot in good position, all wounds closed. plan: revise AFO. continue day and gnith bracing. 2/9/2015- still has a foto drop despite teh tendon transfer, otherwise …	afo
300	2015-03-30	2015-04-01	2006-03-04	9.075	13	M	kampala	28							PIP/neuropathic club foot	2010-01-01	3.825	5.24722					31/3/2015- neuropathic club foot.	31/3/2015- feel off a tree on Sunday and sustained closed fracture right distal radius and ulna displaced. Injection 5 years ago and developed weakness and currently neuropathic clubfoot, all muscle groups weak and tibialis posterior 4/5. plan admit for closed reduction and casting. achilles lengthening and POP.	closed reduction. Did closed reduction under image intensifier and ATL left foot.		right	forearm	elevate both foot and fore arm. Monitor circulation of the extremities. Analgesia as prescribed. X ray of the right forearm.		27/4/2015- cast off today. Oe: foot supple, clinically fracture united. X ray: good callus axis good. Plan: see in 8 weeks with new x ray rt forearm. To workshop for AFO review when fitted.	afo	2/4/2015- availed POP tyre
301	2015-03-24	2015-04-08	2000-12-07	14.3361	18	M	soroti	40							Rt PIP									31/3/2015- 2nd manipulation and casting done. Booked for ATL 8/4/2015.	percutaneous achilles tendon lengthening		right	foot	elevate the limb. For remanipulation on wed next week.		15/4/2015- manipulation and casting done. 8/10/2015- has been on AFO x 3/52. for active exercise at day and splint at night. 9/2/2016- reports improvement. Walks quite well even without the aFO. Plan: continue night only bracing. Review after 6/12. 13/3/2018- he has a fixed flexed big toe. plan: for corrective osteotomy and pinning of the toe.	afo	24/3/2015- first consultation. OE: has POP right leg, able to stand and walk with support. Issued crutches. Rx: walking exs. 13/8/2015- seen patient with reduced ROM rt foot ffg splinting with AFO. Did: active ankle and foot mobilization exes. To repeat exes daily at home.
302	2015-03-03	2015-04-10	2009-06-03	5.85278	10	M	wakiso								PIP Rt foot								3/3/2015- lower limb equinovarus	3/3/2015- h/o lower limb neuritis duration non specific. Father reports chidl was born normal. OR: rt lower limb equinovarus with weakness of the peroneal muscles. TA tendon active, TP active on movement. Ambulation on lat side of foot. Pt unable to dorsiflex foot, mild plantar glexion. no surgical scars. plan: TA transfer + pOP, meawhile M and C x 3/52. 10/3/2015- manipulation and casting done. …	percutaneous achilles tendon lengthening		right	heel	elevate the limb, monitor for swelling, analgesics as per chart, remanipulation next Friday 17/4/2015				17/3/2015- ambulation training done. Issued old pair of crutches.
303	2015-04-24	2015-05-05	2006-05-01	9.01111	13	F	Lira	16							Lt PIP								foot drop and adductus. Also has equinus; 24/4/2015- had surgery (tib posterior tendon transfer) from Kumi, but still has a foot drop and adductus. Also has equinus.		percutaneous achilles tendon lengthening	AFO day and night bracing. Crutches	left	foot	elevate the limb. Monitor the toes for swelling and circulation. Treat as per drug chart. Discharge when comfortable on POP for 4/52		3/8/2015- still with foot frop. Pwer in foot dorsiflexors.		6/5/201-did walking training using crutches. Provided crutches.
304	2015-03-03	2015-05-06	2002-02-02	13.2611	17	F	mityana	34							PIP Lt foot									3/3/2015- 8 yo girl of Pip lt foot walks on the dorsum of the lt foot, with an ulcer on the dorsum. Plan: wound dressing- r/v when wound has healed to plan for triple arthrodesis. 28/4/2015- wound healed except for small wound at base of 5th toe. Plan: for triple arthrodesis lt foot on 6/5/2015.	triple arthrodesis		left	foot	monitor toe circulation. Split cast incase of excessive unexplainable pain or compromised capillary refill. Treat as per chart. For stitch removal and cast change in 2 weeks, book date on d/c
305	2015-04-29	2015-05-08	2002-10-04	12.5944	16	M	luuka								Rt PIP					IM gluteal injection			29/4/2015- rt pes equinovarus supinatus	29/4/2015- rt pes equinovarus supinatus following gluteal IM injection. Plan for percutaneous aTL on 8/5/2015.	percutaneous achilles tendon lengthening		right	heel	elevate the limb, analgesic as per chart, final remanipulation Friday 15/5/2015		23/6/2015- 6 weeks post ATL rt foot. No major complaints. OE: hallux dorsiflexed, foot fairly plantegrade. Plan: workshop for aFO. Meanwhile re-cast the foot. Review with AFO fitted. 24/6/2015- reviewed with AFO fitted. Plan: full time aFO donning. See in 8 weeks. 13/8/2015- he is doing well, foot is plantegrade. the TP/TA tendons are still weak, there are a few spasms as he tries to move the foo…	afo			14/1/2016- has PIP with foot drop. TAT power S. plan: book for TAT transfer (tibialis anterior)	2016-02-17	TA tendon transfer	29/3/2016- 6 weeks post TAT transfer rt foot. OE: cast off today, wounds healed sutures in situ, button off. Foot better position-slight eversion, but hindfoot tends to varus, plantegrade foot when he stands. Plan: suture removal today. To otho-workshop for aFO. partial weight bearing- toe touch gait. see in 8 weeks. 20/5/2016- patient had tendon transfer 3/12 ago, has had full time bracing for 6…	19/5/2015- trained walking using crutches. Provided crutches. 22/2/2016- seen and issued a pair of wodden crutches 47" and a POP tyre. Taught him on ambulation and he is stable.
306	2014-10-10	2015-05-08	2000-09-28	14.6111	18	F	wakiso	43							PIP Rt foot	2005-01-01	4.25833	9.775				febrile illness	10/10/2014- equinus cavus and mild varus.	10/10/2014- had PT, healed with deformity of rt foot. Clinically rt foot flexible, equinus cavus and mild varus. Plan: measure for aFO. Apply POP for 1/52 then review next week with AFO fitted. 17/10/2014- use AQFQ day and night. Do foot exercises. Tab nat B od -252. reivew in 3/12 jan/ 2015. 31/10/2014- repair AFO straps. r/v in jan. 16/1/2015- has burning sensation over rt foot, also has pain r…	percutaneous achilles tendon lengthening		right	heel	elevate the limb, analgesics, keep cast for 6 weeks then review in clinic for aFO.		22/6/2015- foot plantegrade, still has cavus. Plan mold and fit aFO. 24/6/2015- reviewed with AFO molded and fitting well. Plan: continue use of aFO. See in 3 months if no problem.	AFO	10/10/2014- did ambulation on crutches. Availed pop tyre.
307	2015-05-05	2015-05-13	2001-05-30	13.9528	18	M	bushenyi								PIP Rt								6/5/2015- cavovarus supinatus PIP. No equinus.	6/5/2015 rt pes cavovarus supinatus PIP. No equinus. Tibialis posterior power 5/5/. Tibialis power 0/5. peroneii power 0/5. plan: for posterior tibialis tendon transfer on wed 13/5/15.	TP tendon transfer. Detached the whole of tibialis posterior tendon from its insertion and rerouted it at the elvel of musculotendinous junction to the cuboid through interosseous membrane and anchored the tendon using vicryl 1. washed wound closed then dressed and applied below the knee pop with the foot in eversion.		right	foot	monitor vital signs, elevate the foot and monitor toe capillary refill. Treat as per chart. Wound insprection in 2/52.				14/5/2015- rx: gait training NWB on axillary crutches done
308	2015-05-05	2015-05-15	2003-02-02	12.2861	16	F	Kalungu								PIP Rt foot equinus					gluteal region		febrile illness	equinus foot; rt foot deformity x 12 years. Severe supinated equinus foot, thickened dorsum, walks on dorsum of the foot.	weakness and progressive deformity of the foot.	triple arthrodesis		right	foot	elevate the limb and monitor for swelling, analgesics + antibiotics as per chart, wound inspection on 22/5/2015	22/6/2015- wound still has serous dischrage no pus. Recast cloxacillin for 2 weeks for wound check.	22/5/2015- manipulation and casting done. 22/6/2015- wound still has serous discharge no pus. 23/6/2015- bone cement removal. 31/7/2015- still equinus, can discontinue the AFO. 15/3/2016- c/o pain in the right foot. Currently walking using a walking stick due to the pain. pain in the foot is at the incision site especially when manipulated. x rays show a subtalar arthritis.	AFO				2016-04-13	triple arthrodesis	17/5/2016- doing well. 21/7/2016- doing well, minimal pain on movement and walking with crutches.
309	2015-05-12	2015-05-18	2011-11-14	3.51111	7	M	mubende	15							PIP Lt foot	2013-01-01	1.13056	2.36389		IM injection lt gluteal region		febrile illness	12/5/2015- equinus and forefoot adductus deformity	12/5/2015- progressive deformity lt foot x 2 years. Preceded by IM injection lt gluteal region after a bout of fever. Mother noted 3 serial casting done but no improvement. OE: equinus and forefoot adductus deformity. Plan: for percutaneous aTL on 18/5/15,admit on 17/5/2015.	manipulation and casting		left	foot	elevate the limb, analgesics as per chart, keep cast for 4 weeks then aFO.			AFO
310	2015-05-12	2015-05-18	2006-12-08	8.44444	12	F	Wakiso	37 kg							PIP Equinus Rt foot					IM injection RT gluteal region. No formal treatment given.			equinovarus of rt foot	progressive deformity right foot x 7 years, severe equinovarus deformity walking on dorsolateral aspect of the foot, tight plantar fascia, TP power 5 peronei and TA power 0	percutaneous achilles tendon lengthening	crutches	right	foot	elevate the limb, analgesics + antibiotics, triple arthrodesis in 2 weeks (which patient did not show up for)		2/7/2015-missed appointment for triple arthrodesis. Has severe pes equinovarus. Manipulate and cast fro 3/52, then book for triple arthrodesis, avail crutches.		28/9/201- issued a pair of crutches and trained ambulation NWB. Did walking training using crutches			2015-06-10	percutaneous achilles tendon lengthening					2017-11-06	percutaneous achilles tendon lengthening					2017-11-15	manipulation and casting
311	2015-04-23	2015-05-18	2005-04-11	10.1028	14	F	Jinja	34	140						PIP Lt foot	2007-01-01	1.72222	8.31111		quinine injection				no active movements seen	percutaneous achilles tendon lengthening	AFO for full time bracing	left	heel	elevate the limb, analgesic as per chart, keep cast for 4 weeks then AFO		30/7/2015- foot in good position, continue bracing at night. 6/10/2015- still has foot drop but using the AFO. The peroneii and tibialis anterior have no muscle power while the tibialis posterior has less than power grade 3/5. ankle cannot dorsiflex beyond neutral.6/10/2016- foot in good position, slight drop foot. still using AFO. 6/10/2017- received another percutaneous ATL done and POP. 24/5/2…	AFO	19/5/201- RX: gait training (PWB done).
312	2015-05-04	2015-05-18	2000-03-19	15.1639	19	M	kibaale								Rt PIP foot + equinovarus	2004-01-01	3.78333	11.3417		IM injection RT gluteal region. No formal treatment given.		febrile illness	4/5/2015- severe equinovarus.	4/5/2015- progressive deformity rt foot x 11 years. Preceded by IM injection rt gluteal region after a fever. Later developed progressive weakness and deformity of the foot. Now with intermittent pain, welling and wound breakdown when he walks on the dorsum of the foot. oe: thickened skin dorsum of foot, severe equinovarus deformity with foot supination. plan for triple arthrodesis on 11/5/2015. …	dressing, debridement and bone excision		right	foot	daily dressings. Avail crutches. NWB. Will require surgery, when the foto is healed.		17/6/2015- wound on the dorsum rt foot has healed. Oe: wound on the dorsum lt foot healed though the skin is precarious. Plan: book for mid foot osteotomy and aTL lt side next week.		4/5/2016- crutches provided. Precautions of use given.			2015-06-26	ankle arthrodesis	1/7/2016 wound inspection and dressing done. 6/8/2015- 6/52 post subtalar arthrodesis. Plan: reapply walking cast for 4/52. review after 4/52 for cast removal. 3/9/2015- off pop today post subtalar arthrodesis 9/52 ago. The wound healed. Plan: continue with one crutch until comfortable to walk without. review after 4/52. 2/10/2015- has wound for last one week over lateal elft ankle. plan: cirpo 4…
313	2015-05-06	2015-05-20	2000-11-14	14.5167	18	M	wakiso	40							Lt PIP	2004-01-01	3.13056	11.3472				febrile illness	6/5/2015- pes varus supinatus. No equinus.	6/5/2015- plan: for triple arthrodesis on 15/5/2015. admit on 14/5/2015	triple arthrodesis		left	foot	elevate foot, split cast prn, remanipulation in 5 days.		25/5/2015- manipulation and casting done. 8/7/2015- 6 weeks post tripel arthrodesis, wound fairly clean in some areas and healing, foot good plnategrade position. Plan: to workshop for aFO measurement. Apply healing cast for 3 weeks then review and if healed to start donning aFO. caps ampclox 500 mg QID x 2 weeks. 7/8/2015- has clinical union. wound septic. get aFO. daily wound care. r/v in 3 mon…	AFO	21/5/2015- did ambulation training using crutches NWB lt lower limb. 26/5/2015- trained ambulation using crutches. Provided crutches.
314	2015-05-19	2015-05-21	2010-06-05	4.96111	9	F	Mityana	24	124						PIP Rt foot	2014-01-01	3.57222	1.38333		IM injfection ipsilateral gluteus			equinus deformity of rt foot	20/5/2015- progressive deformity of the right foot x 1 year. Preceded by IM injection ipsilateral gluteus. Had therapy in mulago NRH no surgery done. OE: limping gait, equinus deformity of the foot, gluteus no wasted, knee extension normal plan: for percutaneous ATL 21/5/2015. Hb check. 22/3/2015- no complaints. plan: crutches and time for physio. d/c. r/v in 4/52.	percutaneous achilles tendon lengthening	AFO for full time bracing	right	heel	elevate the limb, analgesics, keep cast for 4 weeks then AFO, discharge after 24 hours with tyre shoes and crutches	17/9/2015- AFO is spoiled. Still with a foot drop + mild adductus.	22/5/2015- physio: rx: crutches provided. Ambulation traning done and precautions of use given. Rubber tyre provided. 18/6/2015- right ATL done 4/52 ago. Plan: 1) let AFO. 2) R/V in 4/52. 7/9/2015- the afo is spoiled. Still with foot drop of a mild adductus. plan: continue with AFO during day. r/v after 1 year. 3/3/2016- she comes for control. no pain is reported. the foot can be dorsiflexed beyo…	AFO	elevate the limb, analgesics, keep cast for 4 weeks then AFO, discharge after 24 hours with tyre shoes and crutches		3/8/2017- recurrence of the deformity (equino varo-supinations)- walking on the lateral border of the foot. There is activity in the TP tendon.	2017-09-12	percutaneous ATL	17/4/2018- still has a foot drop as well as adductus and heel varus. has a strong tibialis posterior muscle power 4/5.				2018-08-29	TP tendon transfer	13/11/2018- post TPTT. patient doing well. rt foot is plantigrade. 22/1/2019- no complaints. foot plantigrade.
315	2015-04-28	2015-05-25	2003-03-23	12.1722	16	M	amuria								Severe PIP Lt foot	2014-01-01	10.7722	1.325	IM injection gluteal				29/4/2015- severe supinated equinus lt foot	29/4/2015- deformed painful rt foot x 9 years. Preceded by IM injection lt gluteal region. Progressive deformity now walks on the dorsum of the foot with pain. Has never had proper medical evaluation for treatment. OE: severe supinated equinus lt foot. plan: for manipulation 2-3 casting then aTL. later triple arthrodesis after serial casting. 21/5/2015- child diagnosed with lt pip. 1 pop applied,…	percutaneous achilles tendon lengthening		left	heel	elevate the limb. Analgesics. Cast change next Monday 1/6/2015. will need mid tarsal osteotomy after 3 weeks.		1/6/2015- manipulation and casting.		29/4/2015- trained walking using crutches. Provided crutches.			2015-06-30	midtarsal osteotomy done	25/8/2015- wounds closed, plan remove stitches. Provide aFO for day and night bracing. PT.
316	2015-05-06	2015-05-25	2010-01-01	5.4	9	M	tororo	12							Rt PIP, Bil. Gluteal fibrosis Lt								6/5/2015-rt pes equinovarus	6/5/2015- lt knee in extension and bilateral gluteal fibrosis. Plan:for percutaneous aTL rt and Judet's quadriceplasty lt as first stage then later bilateral gluteal release. For surgery on 13.5.2015. 1/6/2015- manipulation and casting done.	right foot Achilles tendon lengthening under GA		right	foot	analg as per chart. For remanipulation next week and Judet on the left quads.		5/6/2015- manipulation and casting done. 8/6/2015- quadricepts-plasty done. 22/7/2015- off POP today. the foot is well positioned. the left knee flexion is still limited to about 45 degrees. plan: for bilateral gluteal release. 29/7/2015- the cough has improved. plan: book for bilateral gluteal release. 3/8/2015- release of gluteal fibrosis. 3/9/2015- still has an abnormal gait and unable to comp…	AFO	25/6/2015- did ambulation training using parallel ars and crutches. To get crutches from katalemwa. 10/6/2015- started ROM exercises lt knee. ROM 0-100 degrees flexion. 11/6/2015- did ROM exercises lt knee. Passive ROM 0-110 flexion. 12/6/2015- continued with ROM exercises rt knee. applied knee brace to keep knee in full extension. started ambulation training in parallel bars. replaced backslab w…
317	2015-05-13	2015-05-25	2005-10-08	9.63056	13	M	wakiso	23							Rt foot PIP	2007-01-01	1.23056	8.36667		IM injection			13/5/2015- ankle varus, midfoot cavus and forefoot adductus.	13/5/3015- reports h/o IM injection at 2 yo. Developed deformity of the rt foot. Reports h/o AFO use and M+C. oe: rt foot has ankle varus, midfoot cavus, and a forefoot adductus. Allows some dorsiflexion. Power TA/TP 4/5. plan: for posterior capsulotomy on 25/5/15.	percutaneous achilles tendon lengthening		right	heel	elevate the limb, analgesics, provide tyre shoes and crutches, keep cast for 4 weeks then AFO		22/6/2015- foot plantegrade. Plan workshop for aFO mold and fitting. aFO day and night. Review in 6 weeks. 12/8/2015- post aT. Residual varus in rt ankle. Has power 4 in peroneals of t foot. Persistent ulcer lateal rt midfoot. Plan: daily wound care (off AFO to allow ulcer to heal). foot exercises. resume aFO when wound healed. r/v/ 6 monthly.	AFO	26/5/2015- refered from ward for crutches and POP tyre. However, patient is a referral from katalemwa (KCH). Explained to the patient and the mother that they will get the appliances from KCH. Plan: stay at hostel. To be picked tomorrow.
318	2015-05-26	2015-05-29	2004-02-22	11.2694	15	m	MUBENDE	31							PIP Lt foot equinus	2010-01-01	5.85833	5.40278		I injection			26/5/2015- equinus foot	26/5/2015- deformed lt foot x 5 years. Preceded by Im injection then progressed to foot deformity and weakness of the lt leg. Has had 5 serial casting in namutamba. OE: equinus foot TA power 4 TP power 3 peronei weak. Plan: for ATL on Friday 29/5/2015. admit on 28/5/2015.	percutaneous achilles tendon lengthening		left	foot	elevate, monitor toes circulation. Analgesia as prescribed. Pop cast for 4 weeks.
319	2015-05-13	2015-05-29	2002-02-02	13.325		M	ntungamo								PIP right foot					im injection gluteal			14/5/2015- equino varus	14/5/2015- was given an IM injection and the foto gradually started getting deformed. o/e: equino varus deformity of the right foot. Both TP TA have power 3/5. plan: manipulation and casting the triple arthrodesis. 21/5/2015- manipulation and casting done. booked for triple arthrodesis on 29/5/2015.	triple arthrodesis		right	foot	elevate the limb. Monitor circulation of the toes plus swelling. Treat as per drug chart.		21/5/2015- manipulation and casting done. Booked for triple arthrodesis on 29/5/15		14/5/2015- first consultation. Pt has Pop on the leg. Able to stand and walk with support. Rx: walking exs with crutches.
320	2015-04-09	2015-05-29	2002-03-11	13.2167	17	M	masindi	35							PIP Rt foot with TEV deformity	2010-01-01	7.80556	5.27222		rt gluteal injection			9/4/2015- equinovarus	9/4/2015- progressive deformity of the rt foot x 5 years. Preceded by injection into the rt gluteal region. Never had any attempt to treat before. Two weeks ago developed an abscess some foot and I&D done in masindi hospital. OE: severe equinovarus deformity rt foot, wamer, fresh healing scar dorsum of the foot. TP fuction power 4, TA and peronei weak. imp: PIP rt foot. Plan: ampiclox 500 mg tds …	triple arthrodesis		right	foot			1/6/2015- pop cast is slowed. toes pink and warm. plan: wound inspection on friday. meanwhile keep in hostel. cover stained par POP. 5/6/2015- wound inspection and dressing done. 20/7/2015- triple 29/5/2015. remove cast wound healed. Plan: apply walking cast x 6/52. then mold and AFOs there after. 8/6/2015- Discharge home. 2/9/2015- off pop today 3/12 post triple arthrodesis. plan: use one crutch…	AFO	23/4/2015- 1) availed the axilla crutches size 45" and precautions for their use explained. 2) trained ambulation using the axilla crutches two point gain NWB. 8/6/2015- first consultation. Pt with POP cast. Walking with crutches. Rx: issued POP tyre.			2018-12-03	triple arthrodesis	24/1/2019- 7 weeks post rt foot triple arthrodesis. Remove stitches. Cast for 3 weeks then aFO. 19/2/2019- his foot is in plantegrade position, he's doing well. Plan: avail him with an aFO. Review him with he AFO. 3/4/2019- doing well with aFO. Has a slight foot drop but no equinus. plan: continue the aFO for day time use. review after 3/12 for clinical control to assess the possibility of tendon…	4/12/2018- seen patient post op on below knee pop rt. Rx: issued crutches, trained ambulation nwb rt lower limb, patient knows how to walk with crutches
321	2015-05-26	2015-06-05	2006-05-12	9.06389	13	F	rukungiri	20							PIP Lt foot					im injection gluteal			27/5/2015- equinovarus deformity	27/5/2015-progressive deformity of the lt foot x 2 months. Preceded by IM injection lt gluteus. No previous surgery or treatment. OE: equinovarus deformity, weak TP, peroneal and TA functions. Plan: for percutaneous ATL on 4/6/2015.	percutaneous achilles tendon lengthening		left	foot	elevate the limb. monitor the toes for swelling and circulation. Treat as per drug chart. Discharge when comfortable on POP for 4/52.		6/7/2015- off the cast today, foot is plantegrade. Plan: lets avail an AFO. Review with AFO for further instructions. 10/9/2015- foot in good position. Continue with night bracing only. Review in 2 months. 5/11/2015- foot fairly corrected. Has weak peroneal tendon by there is function. plan: stop aFOs. r/v in 2/13 to evaluate possibility of split tendon transfer.	AFO	27/5/2015- gait training NWB on axillary crutches.		22/1/2016- left TP power 5. left TA power 2. plan: admit hostel: book for split TP tendon transfer next week	2016-02-04	TA tendon transfer done	17/3/2016- 6 weeks post OP, off cast today. Plan. Lets avail an aFO for daily use. Review with afo. 18/3/2016- afo fitted. r/v in 6 months. Ankle active ROM exercises.	18/3/2016- rx: aROM exs, PROM exs, advised on use of aFO (day time only) and buying a stocking. r/v next hospital visit. d/c home
322	2015-05-27	2015-06-05	2011-09-11	3.73333	7	M	wakiso								PIP Lt foot	2012-01-01	0.305556	3.40556		left thigh injection		vaccination	27/5/2015- equinus foot	27/5/2015- limping gait x 3 years. Noted when he had just started walking never had intragluteal injection same side, but regulate vaccination injection on the left thigh. oE: tight achille's with equinus foot. Hip and knee normal. Plan: for percutaneous aTL.	percutaneous achilles tendon lengthening		left	foot	elevate the limb, monitor the toes for swelling and circulation. Treat as per drug chart. Discharge when comfortable on PO for 4/52.		7/7/2015- 4 weeks post ATL lt, cast off foot plantegrade. Plan: to workshop for aFO. Review with aFO fitted.	AFO
323	2014-06-02	2015-06-08	2011-09-29	3.69167	7	F	kampala								PIP Rt foot	2013-04-01	1.50556	1.16944		im injection right side			foot varus- supinatus. No equinus deformity.	2/6/2014- no active movements of the dorsiflexion. No specific treatment now, except for daily exercise. Reevaluation yearly to see if there is any muscular activity (TA and TP)	percutaneous ATL + POP		right	ankle	treat as per chart		15/7/2015- off POP after ATL 4/52 ago. Plan: provide AFO. Review after 4/52 with the AFO. 12/8/2015- post Atl with aFO. AFO well tolerated. Has residual mild varus in the heel. Rv yearly next august and evaluate for tendon transfer + posterior capsulotomy or later triple arthrodesis. 1/9/2016- she has an equinus deformity of the right foot with a cavovarus of the foot, she has a strong TP tendon,…	AFO	10/6/2015- ambulation with crutches done. Precautions explained			2016-10-20	percutaneous achilles tendon lengthening	13/12/2016- she has had the cast for 6 weeks, the foot is in plantegrade, there is a drying ulcer on the dorsum of the foot around the ankle joint plan. Lets measure an AFO. Review with the afo. 7/5/2019- has forefoot adduction and supination. Plan: manipulation and casting. then schedule for surgery TPTT and ATL. 28/5/19- manipulation and casting done.	19/6/2019- issued crutches. Child able to walk with crutches.
324	2012-02-07	2015-06-12	1998-02-01	17.3639	21	M	buikwe								PIP Rt foot								hell varus and forefoot adductus, slight foot drop	7/2/2012- c/o rt foot deformity. Rt foot varus- spinatus. It can reach the neutral position, good power of TP tendon. Dx: PIP rt foot. Plan: as 1st step. TP transfer (+aTL if necessary), 2nd option, triple arthrodesis. 24/4/2012- patient is back for operation. plan: for TP transfer (1st stage). check HB. 7/5/2013- AFO is destroyed. still has heel varus and forefoot adduction. also slight foot dro…	ankle arthrodesis		right	foot	elevate, split cast PRN. Drugs as per medicine sheet. May change cast if soiled next week wed		21/5/2015- rt foot swollen. Has been in cast for 2 weeks, let's wait for swelling to subsite. May benefit from triple arthrodesis
325	2015-05-19	2015-06-12	2010-05-02	5.11111	9	F	wakiso								PIP + gluteal fibrosis + equinus rt								19/5/2015- equinus foot	19/5/2015- deformed rt foot and inability to extend the knee x 2 years. Prceded by injection rt gluteal region, then developed swellings rt thigh and pus drained since then progressively developed weakness and knee + foot deformity. OE: tight achille's tendon with equinus foot, scar rt posterolateral thigh, knee ROM 0-100 degrees, squats with slight difficulty. plan: for percutaneous ATL, gluteal…	percutaneous achilles tendon lengthening		right	heel	elevate the limb, analgesics. Cast change to short leg cast after 3 weeks. For gluteal fibrosis release in 6 weeks when he has received aFO. Knee exam- good flexion we can work with for rehab processes		8/7/2015- 4 weeks post ATL. OE: cast off today, foot plantegrade. Plan: to workshop for AFO measurement. Recast the foot. See with AFO fitted will need gluteal release in 2-3 months. 10/12/2015- still has slight difficulty with squatting, the knee ankyloses at about 90 degrees of flexion, has tight right gluteal muscles, plan review her in 2 months to plan for gluteal fibrosis release. 28/7/2016-…	AFO	15/6/2015- she is not managing NWB gait with parallel bars, hence crutches will be difficult. Avoid her from walking for 2 days until the cast is dry. Review on Wednesday to start on crutch ambulation and issue POP tyre. 15/6/2015- ambulation training in parallel bars and using crutches done. not yet stable walking with crutches. continue walking training with crutches. 10/9/2015- knee aROM -1 0-…
326	2015-06-04	2015-06-15	2008-08-17	6.82778	10	F	kampala								PIP Rt foot										percutaneous achilles tendon lengthening		right	heel	elevate the limb. Analgesic. Provide tyre shoes and crutches. Keep cast for 4 weeks then review in clinic for AFO.		16/7/2015- cast off today. TP power 4. to workshop for aFO. r/v/ 6/52 consider TP tendon transfer.	AFO	4/6/2015- ambulation training done. Provided crutches.
327	2015-06-10	2015-06-15	2007-02-19	8.32222	12	M	masaka	19							PIP Rt foot										percutaneous achilles tendon lengthening		right	heel	elevate the limb, analgesics as per RX chart, provide tyre shoe and crutches, keep cast for 4 weeks then review in OPD for cast removal and aFO measurment		15/7/2015- 4 weeks post ATL cast off today. OE: foot plantegrade. Plan: for AFO measurement, fitting. Review with aFO fitted.	AFO
328	2015-06-04	2015-06-29	2004-08-04	10.9028	14	M	butaleja	34							Rt PIP with equinovarus								4/6/2015- mild equinus and heel varus	4/6/2015- PIP, TPT transfer was done in the past and not successful. The patient walks with mild equinus and heel varus. Plan: for subtalar arthrodesis and ATL.	ankle arthrodesis		right	subtalar	elevate the limb and monitor for swelling. Analgesics and antibiotics. For final remanipulation next Monday 6/7/2015.		4/7/2015-manipulation and casting. 4/8/2015- reported earlier than schedueld due to cast breakage. Oe: cast off, wound healed sutures in situ, small little pus discharge distally. Plan: remove sutures + dressing. Reapply the short cast. See her on 17/8/2015. caps cloxacillin 500 mg tds x 7 days. 17/8/2015- foot plantegrade, but no motor function just a flicker. plan: workshop to mold and fit aFO.…	AFO	2/7/2015- ambulation training using crutches done. She is stable walking with crtuches. Provided crutches. 11/1/2016- rx: gentle passive stretching of aT and calf muscles. Weight bearing exercises in crook lying. Active stretching of aT and calf muscles against the wall. use of a wobble board for balancing and stretching exercises. continued home program. r/v on next hospital visit.
329	2015-07-06	2015-07-10	2007-06-05	8.09722	12	M	tororo	26							PIP Rt foot with equinus deformity										percutaneous achilles tendon lengthening		right	foot	monitor toe circulation. Remanipulation in OPD after 1 week, elevate		17/8/2015- foot plantegrade, workshop to mold and fit aFO. Review with aFO. 18/8/2015- has got the aFO. Plan: use the afo while walking. Review after 6/52. 1/10/2015- walks well without a foot drop. Has a mild varus and adductus but flexible. Plan: afo for night only bracing. review after 6/12.	AFO	13/7/2015- did ambulation training using crutches. Crutches and tyre provided.
330	2015-07-07	2015-07-15	2009-09-04	5.86389	9	F	Kampala	18							PIP with acquired clubfoot Lt	2011-01-01	1.325	4.51667		IM injection			7/7/2015- foot drop, equinus	7/7/2015- injection at 2 yo, later developed weakness in the foot- with deevlopment of adduction of the forefoot and equinus. ROS unremarkable. Locally / NSS. Inability to dorsiflex the ankle joint. Forefoot adduction. Equinus of the heel with a varus. DX: PIP with acquired club foot (L). plan: book for tendon achilles release with manipulation in theatre.	percutaneous achilles tendon lengthening		left	foot	elevate the limb, monitor circulation of the toes, maintain cast x 4/52 then r/v in OPD for cast removal and AFO measurement.		13/8/2015- off pOP today 4/52 post aTL. Plan: provide afo. Review after 4/52 with AFO.	AFO	16/7/2015- ambulation training using crutches done. Provided crutches and pop tyre.		8/9/2015- doing well with aFO. Has hell varus and mild adductus with a foot drop. No equinus. Plan: continue with AFO. r/v after 3/12 for re-assessment for possibility of tendon transfers.	2015-11-20	shortening of lateral column done	10/11/2015- lets book for calcaneal swing osteotony. 17/12/2015- cast removed, wound septic. Plan: reapply cast with window for dressing. Caps cloxacillin and wound care at home. 7/1/2016- lets remove the pins today, measure for an aFO. Review her with the aFO, aFO for 4 months day and night. 27/5/2016- hind foot corrected forefoot in slight adduction. still with foot drop, plan get AFO at worksh…	23/11/2015- crutch walking with NWB.
331	2015-06-24	2015-07-20	2007-02-02	8.46667	12	M	tororo	25							PIP Lt foot									2/7/2015- second manipulation and casting done. Plan: for aTL on 17/7/15	percutaneous achilles tendon lengthening		left	foot	remanipulation next week, monitor toe circulation.		27/7/2015- manipulation and casting done. 27/8/2015- off the cast today, foot is still sore and he is unable to bear weight. Foot is plantegrade clinically. Plan: avail an aFO, review with aFO. 28/10/2015- doing well on aFO, has no pain. However has heel varus but no adductus. plan: continue with aFO. r/v after 6/12. 27/5/2016- foot in adductus, TA tendon power 5. admit hostel. lets do weekly man…	AFO	2/7/2015- did ambulation training using crutches. Issued crutches. 21/7/2015- pt with POP left leg. Walking with crutches. Rx: issued POP tyre. Walking exs. 27/5/2016- first consultation. Has POP left leg. Able to stand and walk with support. Rx: walking exs using crutches size 41". 7/6/2016- did ax and counseling. pt is struggling with depression. anxiety, plan: review pt in evening. 7/6/2016- r…
332	2015-07-20	2015-07-24	2005-09-25	9.83056	13	M	amuria	26							Equinocavus deformity rt foot ? PIP									20/7/2015- toe walking on rt foot since childhood. PIP, hereditary perpheral neuropathy. For perc ATL.	percutaneous achilles tendon lengthening		right	heel	elevate the limb, analgesics, keep cast of 4 weeks then AFO		25/8/2015- 4 weeks post ATL cast off today. OE: foot plantegrade, bruised anterior ankle with hematoma, heel cord relaxed. Plan: to workshop for AFO measurement and fitting. Review with aFO. 15/9/2015- aFO for day and night.	AFO	27/7/2015- ambulation training using crutches done. Crutches provided.
333	2015-07-27	2015-07-31	2001-02-02	14.4972	18	F	zumbu	48							PIP/Club foot								27/7/2015- equinus	27/7/2015- PIP with right clubfoot, major deformity being equinus. Knee function very good. Plan triple arthrodesis.	triple arthrodesis		right	foot	drugs as per medicine sheet, cast change Tuesday in theattre, eleavte, split cast PRN							2015-08-04	triple arthrodesis	9/9/2015- 6 weeks post triple arthrodesis rt foot. Oe: cast off today, wound healed and dry, small darkening plantar surface 5th toe, foot good position. Plan: to workshop aFO measure. Suture removal recast the foot. See with aFO fitted. 10/12/2015- walks with a foot drop, wound has a big eschar and not completely dry underneath. plan: resume AFO for 8 weeks. abx. 31/3/2016- reviewed the aboe pat…	4/8/2015- ambulation training using crutches done. Crutches provided. She is stable walking with crutches.
334	2015-07-30	2015-08-07	2010-02-02	5.51389	9	M	buikwe	20							PIP with calcaneovalgus foot rt					gluteal IM injection			30/7/2015- calcaneovalgus foot	30/7/2015- noted c/o rt foot deformity which was preceeded by a gluteal IM injection. No any other complaints. Clincially has a calcaneovalgus foot with paralysis of the foot and weak dorsiflexion. Plan: peroneal tendon transfer.	tendon transfer. Transferred the insertion of the peroneus longus tendon medially and attached to the tibialis posterior tendon.		right	foot	elevate the limb. Treat as per drug chart. Monitor the toes for swelling and circulation.		5/10/2015- post peroneal tendon transfer, cast off today, has good dorsiflexion. Plan stitches out. # physio for ankle exercises, workshop for AFO. r/v with aFO. 7/10/2015- is using an AFO post tendon transfer. The foot is still everted. Plan: discontinue the afo. advised to wear closed shoes with a medial wedge shoe insert. review after 3/12.	AFO	10/8/2015- did gait education NWB gait. Advised on the use of cruthces and precautions explained. 5/10/2015- transferred tendon active. Rx: free active dorsiflexion exercises trained. Note: avoid weight bearing without splint.
335	2015-08-05	2015-08-12	2013-03-13	2.41389	6	M	kabale	32							PIP	2015-01-01	1.8	0.594444						6/8/2015- noted c/o lt foot deformity , which started at the age of 3 years. Clinically the pt walks on the lateral border of the foot, has apralysis of the peroneal tendon. Systemic exam NAD. Plan: for tibialis anterior transfer.	TA tendon transfer. Detached the whole of tibialis anterior from its insertion at the base of the first metatarsal then rerouted it subcutaneously at the evel of musculotendinous junction to the cuboid did tenodesis and anchored with vicryl 1 washed wound then closed.		left	foot	monitor vital sign, treat as per chart, elevate the foot, monitor toe capillary refill.		30/9/2015- just got the aFO for day time use. No complaints. Plan: review after 3/12.	AFO
336	2015-08-12	2015-08-24	2008-02-02	7.56111	11	M	Congo	20							PIP rt foot with flexible equinovarus					IM injection		malaria treatment	12/8/2015- equinovarus	12/8/2015- h/o severe febrile illness in early childhood. Given IM medication for malaria. Later developed weakness rt foot. P/e has flexible equinovarus deformity rt ankle. Plan: book for perc ATL.	percutaneous ATL + POP		right	ankle	monitor toe swelling and perfusion. Maintain cast for 4 weeks. Provide tyre shoe and crutches.		29/9/2015- off POP today. Plan: provide aFO for day and night bracing. Review after 1/12.	AFO	25/8/2015- first consultation. Referred for POP tyre and crutches. Rx: walking exs. Plan: CT walking practice
337	2015-08-19	2015-08-26	2009-02-02	6.56667	10	F	Lubilzi	18							Rt PIP								20/8/2015- pes equinovarus	20/8/2015- rt pes equinovarus in PIP. Plan: for percutaneous ATL.	percutaneous achilles tendon lengthening		right	foot	elevate limb, maintain cast x 6/52.		13/10/2015- just off POP. Plan: provide aFO for full time bracing. Review after 4/52. 19/7/2016- doing well on AFO. Still has a foot drop and amild flexible adductus. Plan: to ortho workshop to modify the aFO and put ahinge. Continue with aFO full time. review after 3/12.	AFO	27/8/2015- did ambulation training using crutches provided tyre and crutches. She is stable walking with crutches.
338	2014-02-18	2015-08-26	2008-05-15	7.28056	11	M	luwero								Right PIP equinus foot	2009-07-01	1.12778	4.63056						18/2/2014- has afo, dorsiflexors, peroneals, tibialis anteiror and posterior weak. Plan continue with AFO, currently no good option for tendon transfer. 4/8/2014- PIP rt foot. Oe: tp x peronei shing. Weaker TA tendons. Plan: 1)CT with AFO. 2) will equire TPT in the future. 3) see in 6/12. 11/8/2015- afo tight. also equinus rt foot deformity. for ATL. will need new aFO.	percutaneous achilles tendon lengthening		right	ankle	treat as per chart. Maintain cast x 4/52		25/9/2015- pTP post atl, over 4 years since injury. Foot plantegrade. Weakness persisted and counseled guidance that what has not recovered over the years will never recover, child will be aFO dependent or later do a bone procedure, 12 years and aboe. AFO broken and needs repair. 4/4/2016- foot plantegrade. TP, TA, peronals weak about 3/5. plan aFO for now.	AFO	27/8/2015- ambulation training using crtuches done. Provided crutches and rubber tyre. 29/9/2015- noted child with stiff ankle and wasted muscles of the lt calf. Walks with a limp without crutches. Did ankle mobs, ankle acitve exs, home exs, weaned off crutches.
339	2015-08-04	2015-08-28	2010-02-02	5.57222	9	F	tororo	15							Rt foot PIP	2012-01-01	1.91389	3.59167		IM quinine gluteal injection			5/8/2015- equinovarus deformity	5/8/2015- reports following progressive deformity of rt foot following. IM injection of quinine 3 years ago, pMH: unremarkable. Oe: paralysis of the rt foot muscles, noted equinovarus deformity with severe inversio of foot and mild forefoot adductus. tight achilles tendon. imp: rt foot PIP. plan: serial M + c. later for aTL in theater. 11/8/2015, 18/8/2015- manipulation and casting done.	percutaneous achilles tendon lengthening		right	foot	elevate the limb, analgesics as per chart, provide tyre shoe and crutches, keep cast for 6 weeks then aFO.		13/10/2015- 46 weeks post ATL rt side. OE: cast off today, foot good position. Plan: workshop for aFO measurement molding and fitting. Meanwhile recast the foot. See her with AFO fitted. 13/1/2016- doing well with AFO. Still has a foot drop. Plan: cotninue with aFO for daytime bracing only. review after 6/12.	AFO	6/8/2015- rx: gait trained NWB
340	2015-08-18	2015-08-28	2009-02-02	6.57222	10	M	mpigi								PIP Rt foot								19/8/2015- cavovarus	19/8/2015- progressive deformity of the rt leg x 5 years. Reports deformity preceded by injection into the rt thigh during immunization has never been treated before. Oe: walks on the dorsum of the rt foot cavovarus foot with equinus deformity. TP and TA function weak/ absent. plan book for percutaneous ATL rt foot,	percutaneous achilles tendon lengthening		right	foot	elevate the limb, analgesics as per chart, remanipulation and final cast next Friday 4/9/2015		6/10/2015- 4 weeks post ATL rt foot, residueal midfoot varus foot plantegrade. Plan: worshop for AFO measurement, molding and fitting. Review with AFO fitted. Meanwhile recast the foot.	AFO	31/8/2015- seen the pt with pop, rx: trained walking using crutches. Issued a tyre.
341	2015-08-17	2015-08-28	2000-02-24	15.5111	19	F	wakiso	39							PIP left foot equinocavovarus					IM injection			17/08/2015-equinocavus deformity	17/8/2015- I injection during childhood. For aTL then m and c then reevaluate for triple arthrodesis.	percutaneous achilles tendon lengthening		left	foot	elevate the limb, book for triple arthrodesis next week, analgesics as per chart.				31/8/2015- first consultation. Girl with pOP left leg. Rx: walking exs (PWB and NWB gait) with crutches.			2015-09-07	triple arthrodesis	14/9/2015- wound insprection, remanipulation and casting. 4/2/2016- child happy with result, foot in slight cavovarus. Plan: to workshop to repair aFO. r/v/ in 6 months for clinical follow up and consider being off AFO
342	2015-08-17	2015-09-01	2005-01-14	10.6306	14	M	iganga	28							Left PIP	2007-01-01	1.96389	8.62778		quinine injection			17/8/2015- equinovarus deformity	17/8/2015- 10 yo boy, history of equinine injection 2007. has had some PT and splinting. Clinically rigid talipes equinovarus deformity. Plan schedule for triple arthrodesis. Meanwhile start manipulation and casting. 25/8/2015- manipulation and casting done. plan: for triple arhtrodesis on 2/9/2015	achilles tenotomy. Manipulated foot to achieve plantegrade position. Defered triple arthrodesis.		left	ankle	monitor vitals till spinal off. Analgesia as per drug chart. Elevate limb on pillow will need remanipulation next Tuesday 8th september.				2/9/2015- boy with pop on left leg. Has crutches. Walking well with crutches. Purchased elsewhere 42". Pop well tolerated. Rx: issued POP tyre. Adised to reduce height of crutches to 41"			2015-09-08	percutaneous ATL	1/10/2015- pop cast off today. Foot has some residual cavus. Plan: full time bracing with AFO. May benefit from triple arthrodesis later. 3/12/2015- he is doing well, still has weak tibialis tendons, power in TP is 3/5, foot is still plantegrade, plan: continue day AFO. review him in 4 months.
343	2011-08-25	2015-09-04	2005-01-01	10.675	14	M	wakiso								PIP Lt								25/8/2011- equinovarus	25/8/2011- review the patient, he has lt pip with drop foot. The power of tibialis posterior is 3, and anterior or no tendon for transfer foot comes to neutral position. D: PIP lt. plan: continue with AFO. Plan: provide new AFO. 19/8/2015- father reports recurrence of lt foot deformity. last used aFO almosta year ago. oe: equinovarus lt foot, forefoot flexible, good tp and peroneal power. plan: f…	percutaneous achilles tendon lengthening		left	foot			14/10/2015- just off POP. The foot is flexible. Plan: provide an AFO. Review after 8/52.	AFO			22/6/2017- doing fine, noted active TP and TA tendons grade 3. patient still on aFO, patient is a candidate requestig time before next surgery. Oe: foot at plantegrade, drop foot deformity. Plan: review in P7 vacation for TP tendon transfer. Meanwhile lets continue AFO. 21/11/2017- still has a foot drop and using an AFO. has power in the tibialis posterior but not anterior. plan: schedule for tib…	2018-01-05	TP tendon transfer	21/2/2018- off POP 6/52 post tendon transfer. The wounds healed. Plan avail an aFO for full time bracing. Review for control after 1/12.
344	2015-08-26	2015-09-07	2007-03-12	8.48611	12	M	koboko	21							Equinus Rt in PIP					IM quinine gluteal injection					achilles tendon lengthening		right	foot	analg as per chart. POP cast for 4 weeks.		6/10/2015- off POP today. The foot is well positioned. Plan: provide AFO for day time use. Review with AFO after 6/12.	AFO	8/9/2015- ambulation training using crutches done. Patient is stable. Issued crutches.
345	2015-09-01	2015-09-14	2008-02-02	7.61667	11	M	bukedea	17							PIP left foot	2010-01-01	1.91389	5.66667		IM injection			1/9/2015- equinus	1/9/2015- deformity left foot. Oe: equinus deformity of the left foot with tight achilles tendon. Plan: ATL.	percutaneous ATL + POP		left	ankle	anal as per chart, avail a walking tyre, dc when ready, review in 6 weeks
346	2015-12-16	2015-09-21	2007-08-10	8.11389	11	M	tororo	20							Rt PIP								equinovarus		percutaneous ATL + POP		right	foot	treat as per chart, monitor toe circulation, eleate to reduce swelling, keep cast for 6 weeks.		17/9/2015- pc rt foot deformity. He was born normal, but developed the deformity later. Clinically has equinovarus foot. 3/11/2015- 5 weeks post ATL rt foot. Oe: cast off today, foot plantegrade mild varus midfoot. Plan: to ortho workshop for AFO measurement by fitting see with aFO fitted. re-cast foot meantime. 6/1/2016- doing well on AFO. she walks quite well without FO. oe: has good power in t…	AFO	22/9/2015- ambulated patient (PWB)
347	2015-10-01	2015-10-12	2007-08-05	8.18611		M	kayunga		24						PIP Lt foot										percutaneous ATL + I&D		left	ankle	analg as per chart		10/11/2015- off POP today. The position of the foot is good. Plan: provide aFO for full time bracing. Review after 4/52 for reassessment for possible tendon transfer.8/12/2015- no major issues except that chidl cannot squat. Using aFO. Oe: foot plantegrade, squats but with slight difficulty. plan continue AFO use. see in 2 months for clinical control. 11/2/2016- he is using aFO well, AFO is worn …	AFO				2016-06-24	TP tendon transfer done	2/8/2016- has had the cast for 6 weeks. Plan: remove the cast, measure for an aFO. Review him with the aFO. Review in 3 months, day and night aFOS. 3/11/2016- he walks well without the aFO, the foot is in a slight forefoot adductus, he is able to dorsiflex the foot well. plan: to sue the aFO at night only. review him in 6 months. 4/5/2017- he is doing well, the aFO is spoilt, there is a slight dr…	27/6/2016- seen patient and trained ambulation using parallel bars NWB lt lower limb. Patient to get crutches from acheru.			2019-01-29	calcaneal osteotomy	19/3/2019- has some mild pan when ambulating. Wound has healed, plan: remove stitches, avail aFO. Review after 2/12 for clinical control. 21/5/20190 he has pain in the foot with parasthesias . The pain is on the dorsum of the foot plan: tab brufen 200 mg bd for 10 days. tab nat b 2 tab od for 2 months. review in 2 months.	30/1/2019: seen kerim post calcaneal osteotomy left heel, no new complaint with cast soiled with blood on the calcaneal region. Has full knee ROM and GMP 3/5. RXP: to ambulate him out of bed. Rx: trained him ambulation NWB gait with a walker, very stable with a walker; will progress to crutch ambulation upon their acquisition
348	2015-05-07	2015-10-27	2011-04-21	4.51667	8	F	Mpigi								PIP Rt foot								1/6/2015- still has rigid equinus. Plan serial manipulation and casting 2 weekly for one month. 15/6/2015, 29/6/2015, 13/7/2015, 27, 7, 2015- manipulation and casting done. 10/8/2015- foot still rigid.5/10/2015- hindfoot still in varus and rigis.	5/10/2015- tibialis anterior strong but hindfoot still in varus and rigid. 19/10/2015- manipulation and casting done.	calcaneal osteotomy- lateral incision, protected the peroneal tendons, exposed and calcaneal osteotomy with lateral translation done with pinning (2). Hind foot in neutral position, irrigated and closed with 3/0 monocryl.		right	foot	elevate limb on pillows, drugs as per chart, will keep cast for 4 weeks then pin removal and apply another walking cast.		31/10/2016- manipulation and casting done. TCA in 2/52. 15/11/2016- Off POP today, the foot is flexible. Plan: provide an aFO with a hinge Rt side. Review after 4/52 for reassessment for possible tendon transfer. 13/12/2016- she is on aFO mother says no much progress. OE: has hindfoot varus and forefoot adductus with head fo talus felt latearlly but easily relocates. TA tendon function grade 5, T…	AFO	28/10/2015- ambulation training using crutches done, she is stable. Issued crutches.			2017-02-10	TA tendon transfer done	21/3/2017- POP off today. The foot is plantigrade all the surgical wounds look clean. There is activity in the transferred TP tendon (dorsiflexion- pronation). RX: remove stitches today. Physiotherapist to see for teaching the child and the mother the active exercises for the tendon. Use AFO and crutches. clinical control in 5/52. 27/4/2017- she is doing well, feet plantigrade. there is active do…	13/2/2017- seen paient and availaed a pop yre, trained ambulation using a walker. caretaker says they left the crutchces at home. 20/3/2017- cast removed. Child has aFO and crutches at home. O: has weakness in the tib ant tendon, weakness in dorsiflexion. RX: ankle stretching exs, active anle dorsiflexions and ankle pumping exs. Continue with exs at home.
349	2013-11-14	2015-11-02	2011-01-01	4.83611	8	M	Wakiso								Rt PIP	2013-10-01	2.75	0.119444		IM gluteal injection			14/11/2013- foot drop	14/11/2013- results of an iM gluteal injection 1/12 ago resulted in weaness of the right lwoer limb that has gradually improved. However now walks with a foot drop. Plan: provide AFO, PT, review after 6/12.	percutaneous ATL + I&D		right	foot	monitor toe circulation, analgesia as prescribed, maintain pop cast for 6 weeks.		27/10/2015- has been on PT for the last 2 yeasr and no much progression. Used afo for ony 6 months and stopped. Oe: supinated and varus with tight achille's tendon on knee extension. Plan: book for fractional ATL lt side. 15/12/2015- off POP today. Plan: provide AFO. review after 4/52. 12/1/2016- the foot in a good position, plan: continue using an AFO. 12/4/2016- doing well with AFOs though they…	AFO	3/11/2015- seen and did ambulation training in parallel bars and using cruthces. Issued crutches and a tyre.
350	2015-11-02	2015-11-11	2011-02-02	4.775	8	M	Mityana								PIP left foot	2012-01-01	0.913889	3.83611		IM injection			3/11/2015- flexible equino varus deformity with tight achilles tendon	3/11/2015- c/o deformity left foot. Had an IM injection at 1 yo and deformity propgressed since then, has been undergoing manipulation and casting from a hospital in mityana. Plan: percutaneous ATL	percutaneous ATL + POP		left	foot	elevate limb, monitor circulation of the toes. Maintain cast x 4/52 then R/V in OPD for AFO. Provide a tyre. Discharge homr tomorrow.		10/12/2015- pop off today, foot is plantegrade. Plan: aFO day and night review in 3/12.	AFO	12/11/2015- gave crutches and POP tyre (donated) for home use. Precautions of use given.
351	2015-11-03	2015-11-11	2008-06-25	7.37778	11	M	kampala	23							PIP Right foot	2011-01-01	2.51667	4.83889		IM injection			3/11/2015- cavus and varus deformity with foot drop	3/11/2015- had an iM injection at 3 years, now the foot is deformed. Oe: cavus and varus deformity with foot drop. Power tibialis anterior 3/5, tibialis posterior 4/5. plan: book for tendon transfer.	TP tendon transfer. Detached the whole of tibialis posterior form its insertion and rerouted it through the musculotendenous junction to the cuboid anchored it using vicryl 1 washed wound, closed dressed, released tourniquet then applied below the knee pop. had good toe capillary refill.		right	foot	monitor vital signs, treat as per chart. Keep POP x 6/52		17/12/2015- measure for aFO, reapply cast as we await aFO. Review with AFO. 19/1/2016- still has a foot drop when he walks, plan: continue AFO bracing, review 3 months.	AFO	12/11/2015- rx: ambulated NWB with axillary crutches
352	2014-06-25	2015-11-16	2003-04-28	12.55	16	F	wakiso	36							PIP Lt foot	2010-01-01	6.675	4.48333		IM injection			25/6/2014- hindfoot varus with forefoot adductus	25/6/2014- progressive deformity lt foot following IM injection 4 years ago. Has been using aFO and had serial casting under care of katalemwa CH. OE: abrasion/ superficial wound over the achilles tendon. Hindfoot varus with forefoot adductus, foot flexible. TA and peroneal grade 1. TP function grade 5. Imp: pIP lt foot. plan: treat the wound on the heel: ampliclox 500 mg TDS 10 days, dressing of…	percutaneous achilles tendon lengthening		left	ankle	elevate the limb, analgesics as per chart, provide tyre shoes and crutches. Keep cast for 6 weeks then aFO		22/21/2015- off POP today. Plan: provide AFO. Review after 4/52 with the AFO.	AFO	17/11/2015- ambulation training using cruthces done. To get crutches and tyre from katalemwa.
353	2015-01-08	2015-11-16	2002-02-01	13.7917	17	m	WAKISO	48							PIP Lt left hamar toe								29/1/2015- severe equinus lt side in PIP		percutaneous achilles tendon lengthening		left	ankle	elevate the limb, analgesics as per chart, for remanipulation next Monday. Will need midfoot osteotomy after 2 remanipulation.				17/11/2015- seen and trained how to walk with crtuches. He is stable. Issued crutches.			2015-12-09	triple arthrodesis	15/2/2016- stitch removal today. 14/3/2016- foot plantegrade, acceptable position, workshop to mold and fit aFO when ready. 4/4/206- fitted with aFO, plan review in 3 months. 30/6/2016- c/o in the toes, foot is plantegrade. Also has a hamartoe. Plan: aFO day bracing. review in 3 months. 31/8/2016- patient much better has been using aFOs for dat time bracing for 4 months now. plan: continue day ti…
354	2015-11-05	2015-11-20	2012-04-21	3.58056	7	M	south sudan	15							PIP Rt foot drop	early childhood			2 days after injection					6/11/2015- h/ weakness in the foot two days following immunization in early childhood. Initial tests done from Gulu hopsital ruled out polio. Rt ankle spasticity, with high stepping gait. Drags toes across floor. Plan: for fractional ATL and then AGO. get CBC.	percutaneous achilles tendon lengthening		right	leg	elevate the limb, analgesics as per chart, keep cast for 6 weeks, provide tyre shoes and crutches allow weight bearing		7/1/2016- has come off POP today. Provide AFO to use for 3/12. r/v/ in 3/12.	AFO
355	2014-08-26	2015-12-02	2012-03-02	3.75	7	M	jinja	12							PIP Right foot	2012-10-01	0.580556	1.90278					26/8/2014- equinovarus deformity right foot	26/8/2014- c/o right foot deformity. Followed an injection when child was 7 mo. PMH told by a doctor that child had kidney disease. OE: ggc. Locally: equinovarus deformity right foot. Ortho review: PIP right foot, slight equinovarus, weak TP/TA tendons. plan: lets measure an aFO. review with aFO. 28/10/2014- AFO fitted. motor function difficult to assess. foot brabable. plan AFO causing pressure …	examination under anesthesia		right	foot
356	2015-02-10	2015-12-07	1999-02-09	16.8278	20	F	kampala	42							deformity lt foot (PIP)	1999-11-01	0.727778	15.275					10/2/2015- lt foot cavus, varo supinated, foot at 90 degrees	10/2/2015- h/o injection at 9/12 of age. Treated conservatively. Oe: lt foot cavus, varo supinated- foot at 90 degrees. Able to walk nd squat. Moderate foot drop. D: deformity lt foot. Plan: for triple arthrodesis. 24/11/2015- rt foot PIP reports no major complaints except for occasional discomfort when walking OE: cavus and supinated and hindfoot varus, mild equinus. plan: book for triple arthro…	triple arthrodesis		left	foot	elevate the limb and monitor for swelling. Analgesics. Keep cast for 6 weeks		19/1/2016- 6/52 post triple arthrodesis. Off pOP. The wound has healed except for the distal 1/3 of the incisional wound is still wet. Plan: remove stitches. Reapply below knee POP cast for 4/52 more. Review after 4/52 for cast removal. 17/2/2016- off POP today 10/12 post triple arthrodesis. the wound is healed. plan: review after 4/52 to assess the gait. 31/5/2016- doing well except for occasion…		8/12/2015- ambulated and gait trained NWB
357	2015-12-09	2015-12-11	2003-06-13	12.4944	16	F	amuru	30							Lt foot PIP ? Post tendon transfer					IM quinine injection			9/12/2015- equinus, wih midfoot cavus and forefoot adductus. Tight achilles tendon.	9/12/2015- reports deformity lt foot, results on an IM quinine injection as a child. Had surgery done in mulago in 2008, but had no follow up. Now has recurrent deformity of the foot. Oe: ambulates with crutches. Noted 3 scars. Plan: atl in theater	percutaneous achilles tendon lengthening		left	foot	elevate the limb, analgesics as per chart, book for triple arthrodesis early january 2016							2016-03-02	triple arthrodesis done
358	2015-11-09	2015-12-16	2007-02-02	8.87222	12	F	wakiso	17							PIP right foot									9/11/2015- PIP right foot. Strong tibialis anterior tendon, plan serial casting for 3 weeks then tendn transfer. Manipulation and casting done. TCA 24/11/15. 1/12/2015- cast off today after 3 serial manipulations. OE: strong tibialis anterior tendon function. plan: book for TAT rt foot. CBC + RCT. meanwhile re-cast the rt foot.	TA tendon transfer. Three longitudinal incisions on right lower limb, anterolateral mid leg, over medial cuneiform and over cuboid. Identified TA tendon insertion, split from distal to proximal using loop stitch, detouched lateral part and withdrew proximally till myotendinous junction. prepared loop hole in cuboid and fasciocutenous tunnel over anterolateral distal leg. channeled split tendon an…		right	foot	monitor vitals till stable. Keep eg elevated on pillow to minimize swelling. Analgesia and antibiotics as per drug chart. NWB for 3 weeks. Change cast and remove stitches after 3 weeks.		22/1/2016- cast off remove stitches. Get negative cast for aFO then reapply cast for another 2 weeks. 10/2/2016- has been on aFO for 2/52 now. The foot is still inverted but no foot drop. Plan: continue with AFO for night only bracing. Review after 6/52.	AFO	9/11/2015- ambulation training using crutches done. Issued crutches.
359	2015-12-02	2016-01-04	2001-02-02	14.9222	18	M	luwero								Equinus deformity right foot results	2004-01-01	2.91389	11.9194		IM injection			2/12/2015- severe equinus, rigid.	2/12/2015- results on an im injection at 3 years. Has a deformed right foot. Plan: m+c first. Will benefit from midfoot osteotomy. 10/12/2015- m+ c done. Plan: fot atl + midfoot osteotomy.	percutaneous achilles tendon lengthening		right	foot	elevate the limb, monitor the toes for circulation and swelling. Treat as per drug chart. Remanipulation and cast change on 11/1/16.		11/2/2016- has come off pop today provide aFO, and review with AFO.	AFO	2/12/2015- first consultation. Oe: has POP right leg. Rx: walking exs with crutches. Walking well. 12/2/106- ambulated and gait trained (partial weight bearing).
360	2015-08-25	2016-01-07	2007-06-03	8.59444	12	M	kampala	26							PIP Lt foot	2018-01-01	10.5778	2.35		Im injection	naguru hospital		25/8/2015-mild equinus	25/8/2015- progressive deformity lt foot x 7 years. Result of IM injection from naguru hospital, he was treated in mlago hospital in PT dept but no marked improvement. Father concerned that the foot in bending inwards but child does not report any pain. oe: varus foot with mild equinus, slight weakness of both tibialis muscle power, foot flexible. plan: to worshop for AFO, stretching exercises. h…	TA tendon transfer. Performed percuatneous ATL. 3 step incision identified TA at its insertion point, split and detached the lateral half retracted proximally. Created tunnel beneath the extensor retinaculum pulled tendon through incision over middle cuneiform created osseous tunnel into the bone, running suture vicryl no 1. onto the transfer tendon performed and pulled tendon the transfer segmen…		2	foot	2elevate the foot and monitor circulation, analgesics and antibiotics, tyre shoe and crutches. Keep cast for 6 weeks the aFO.		22/2/2016- 6 weeks post TATT. wounds healing fine. plan apply short leg walking cast for 4 weeks.		8/1/2016- first consultation. Pt has pOp cast right foot. Rx: gait training nwb. Walking well. 22/2/2016- issued a pop tyre. To start using it on Wednesday since POP cast is still wet. 5/9/2016- issued a tyre, taught gait NWB.		14/3/2016- foot plantegrade but hind foot still in varus. Plan calcaneal osteotomy when ready probably during holidays	2016-09-02	calcaneal osteotomy performed	18/10/2016- 6 weeks post calcaneal osteotomy lt side. No major issues. Oe: cast off, pins and sutures in situ, hindfoot well aligned. Pan: sutures and pins removal review with aFO fitted
361	2015-12-17	2016-01-20	2007-12-22	8.07778	11	F	luwero								Left foot PIP sickler	2010-01-01	2.025	5.96111					17/12/2015- severe cavovarus foot.	17/12/2015- she was injected 5 years ago and developed PIP. She is also a known sickler, she developed PIP with severity increasing as time went on. Plan: serial castings and will later require surgery. 7/1/2016- manipulation and casting done.	percutaneous ATL + POP		left	ankle	monitor till stable. Elevate limb. Analgesia as per drug chart. For negative cast and remanipulation next week- 27/1/2016		26/2/2016- post aTL. Cast off. Reports pain in left shoulder and rt leg and fever for las 3 days. Took coartem. Plan get aFO from workshop. Get RDT and wbc. No MPs found, WBC okay for patients' condition (18.8) rx: syr ibumol 7.5 ml tds x 2/7. tabs folic acid 1 tab od x 1/12. ORS 6 sachets. review after 4 weeks.	AFO	17/12/2015- rx: did walking training using crutches. Issued a pair of crutches. 28/1/2016- issued a piece of pop tyre and fitted it. Can't ambulate today child is in pain and in a crisis (a sickler). Allowed to rest and rehydrate and ambulation can start tomorrow. 20/1/2016- she is now more stable. trained walking with crutches (PWB).
362	2015-12-21	2016-01-22	2009-07-01	6.55833	9	m	wakiso								Left PIP	2010-12-01	1.41667	5.05556					21/12/2015- left foot drop	21/12/2015- o/e: high stepping TP tendon transfer in january.	TP tendon transfer. Identified tibialis posterior, detached from insertion, transfered dorsally to the medial cuneiform, foot plantargrade, and well perfused.		left	foot	drugs as per chart, elevate limb on pillow,will keep cast for 5 weeks then fit AFO, NWB crutches		1/3/2016- 6 weeks post TPT transfer. Oe: cast off today, foot plantegrade, good ankle dorsiflexion and all wounds healed. Plan: to ortho-workshop for AFO. Reviewed with AFO fitted. Don the afo full time with intermittend removal for ankle ROM. Allow PWB In crutches. see in 8 weeks. 17/5/2016- 4 months post TPT has been on aFO no major issues. oe: foot nice position and plantegrade. plan: disconti…	AFO	25/1/2016- seen and done ambulation with parallel bars and he is stable. Started on crutches, he is fairly stable. Issued a pair of wooden crutches.
363	2016-01-27	2016-02-05	2004-02-02	12.0083	15	F	Gulu	40	149						Rt PIP								pes equinovarus supinatus. No equinus.		achilles tendon lengthening	AFO	right	ankle	analgesia with ibuprofen 400 mg bd		23/3/2017- still walks on the lateral edge of the foot, has an varus of the forefoot, the toes are in flexion. Will benefit from a triple arthrodesis of the foot to put it in correction		6/10/201- seen patient day one post op, on a below knee pop, reports some pain foot, on pain medication. Rx: trained ambulation nwb RT lower limb with support of a walker, patient is stable walked out of cubical and back- 30 meteres. Reports having crutches at home.
364	2016-01-06	2016-02-10	1999-11-05	16.2639	19	F	wakiso	45							PIP with cavovarus right foot								7/1/2016- cavovarus foot with an equinus of the foot	7/1/2016- she was injected at a young age and she developed a weakness of the right foot, tendon transfer was done but she never really improved, now returns with a cavovarus foot with an equinus of the foot, difficulty walking. Plan will require a triple arthrodesis to correct the deformity. 26/2/2016- two weeks post oeprative. cast clean. plan: schedule for ound inspection next week under anaes…	triple arthrodesis		right	ankle	treat as per chart, pop revision in 2 weeks if necessary, removal of k wires after 4-6 weeks, start physio		7/4/2016- pop off today, wound clean. Plan. Remove k wires and stitches. Reapply pop for 6 weeks. 13/5/2016- cast off post triple arthrodesis. Plan: workshop for negative cast for AFO. Rv in OPD with orthosis. 21/6/2016- she has got the afo. Plan: use afo when ambulating. review after 6/52 for control. 2/8/2016- has been on afo. walks well even without it. the foot is well positioned. reports no …	AFO	11/2/2016- doing well, child stable with walker, did crutch walking. Child very ok with crutches. To get crutches when able financially. 12/2/2016- availed crutches. Ambulation done on crutches.
365	2012-10-30	2016-02-12	1999-01-01	17.1139	20	M	Jinja	60	171						PIP with osteo Rt metatarsal 5								PIP with osteo rt metatarsal 5	bone loss of the 5th metatarsal. No visible sequestrum; ulcer on the lateral border of the right foot with foul smelling discharge. Foot is insensate	debridement. Excised off the necrotic slough on the lateral plantar aspect of the foot. No bone exposed. Lavaged with hydrogen peroxide and dressed with iodine soaked gauze.		right	foot	elevate the limb, analgesics + antibiotics, daily dressing	26/2/2016- back for wound inspection post rt foot debridement, still with residual 1.5 cm diameter ulcer.	2/1/2017- bone cement removal.					2017-10-04	sequestrectomy done.
366	2015-12-16	2016-02-23	2007-06-01	8.72778	12	M	wakiso	25							Lt PIP					IM gluteal injection			16/12/2015- pes varus supinatus lt side	16/12/2015- has no equinus. Tibialis anterior power 5/5, tibialis posteiror power 3/5, while peroneii are power 0/5. plan: for tibialis anterior tendon transfer towards the end of Jan 2016. meanwhile start serial manipulation and casting at the beginning of january. 12/1/2016- removed POP. 2nd manipulation and casting done. TCA 19/1/16. 28/1/2016- pop off today. child to be scheduled for TA trans…	Calcaneal osteotomy- reevaluated foot and found hind foot with rigid varus and mid foot supinated. Concluded that TA tendon transfer may not be adequate to correct deformities. Through lateral incision over calcaneus, protected peroneal tendons with retractors, elevated periosteum on inferior aspect of calcaneus and performed calcaneal osteotomy to swing inferior segment laterally.		left	foot	monitor till stable. Monitor toe perfusion for adequate capillary refill. Analgesia as per drug chart. Provide axillary crutches for NWB. Cast for 6 weeks.		7/4/2016- he is doing well, the cast is off, foot is plantegrade. Plan: avail an afo, review with the afo. 19/5/2016- has no complaints, foot is still plantagrade. Wounds are healed. Plan: continue AFO day time only review in 2 months. 14/7/2016- he is doing well, has an eversion of the calcaneous no foot drop, plan review in 6 months.	AFO	6/1/2016- first consultation. Oe: child has POP left leg. Able to stand and walk with support. Rx: gait raining using crutches NWB.
367	2016-03-02	2016-03-11	2009-07-04	6.68611	9	F	buyende								Rt PIP with equinus								2/3/2016- severe equinus rt ankle in pIP. Slight varus.	2/3/2016- has been undergoing serial manipulation and casting from katalemwa. Plan: for percutaneous ATL.	percutaneous achilles tendon lengthening		right	foot	monitor toe circulation, elevate the limb, pop for 4 weeks
368	2016-01-07	2016-03-14	2003-02-02	13.1167	16	F	KAMPALA	26							PIP Right foot	2006-01-01	2.91389	10.0167				febrile illness	7/1/2016- equinovarus deformity of the right foot.	7/1/2016- was injected about 10 years ago, she was suffering froma febrile illness, she has since developed an equinovarus deformity of the right foot. Foot is flexible, plan: apply serial casts then aFO. 14/1/2016- manipulation and casting done. TCA on 21/1/16. 21/1/2016- manipulation and casting done. TCA on 28/1/16. 28/1/2016- manipulation and casting done. TCA on 4/2/16 for cast removal and r…	TP tendon transfer. Performed percutaneous ATL. Four step incisions. Harvested tibialis posterior from insertion, re-routed through the interosseous membrane and transfixed to the cuboid and held by sponged button on the lateral plantar aspect of the foot.		right	foot	elevate the limb, and monitor for swelling. Analgesics and antibiotics. NWB in crutches. Keep cast for 6 weeks.		28/4/2016- patient had tendon transfer done 6 weeks ago, is happy with results. plan: avail AFOs stitch removal.	AFO	7/1/2016- issued a pair of crutches and taught how to use them NWB.
369	2015-07-28	2016-03-18	2009-02-02	7.12778	10	F	wakiso	17							PIP Rt foot	2011-01-01	1.91389	4.575		gluteal iM inection			28/7/2015- hindfoot varus with mild equinus flexible foot	28/7/2015- progressive deformity of the rt foot x 4 years. Preceded by iM injection Rt gluteus. Walks with a limp and feels occasional pain rt knee. No treatment before. Oe: hindfoot varus with mild equinus flexible foot. Plan: apply short leg cast today + tyre shoes. provide crutches. see in 4-6 weeks later. 11/8/2015- manipulation and casting done. TCA 18/8/15. 18/8/15- mainpulation and casting…	calcaneal osteotomy. Noted hindfoot varus which could not be correctd by tendon transfer so opted to do calcaneal osteotomy. Antibiotic prophylaxis, torniquet ischemia, aseptic technique. Lateral incision protected the peroneal tendons, periosteal elevation, osteotomy done with lateral translation, pinned the osteotomy site hind foot varus corrected.		right	foot	drugs as per chart, elevate limb on pillow, NWB/ crutches. Will keep cast for 4 weeks.		19/4/2016- 4 wees post calcaneal osteotomy rt foot. Oe: cast off today. Hindfoot good, wound healed small raw area, k wires in situ. Plan: suture + k wires removal today. Reapply cast. See in 4 weeks cast off + new x ray and start AFO use. 17/5/2016- 4 weeks post calcaneal osteotomy rt foot. no majro complaints grandma very satisfied with the current foot position. oe: hindfoot alignment impressi…	AFO	28/7/2015- availed crutches and POP tyre. Ambulated with crutches and explained precautions. 21/3/2016- ambulation training using crutches done. Issued crutches.
370	2016-03-03	2016-03-21	2001-05-14	14.8528	18	M	masaka								PIP Rt knee flexion contracture	2011-11-01	10.4639	4.33889						4/3/2016- h/o im injection at 6 months of age. Developed acute flaccid paralysis of rt LL. Had ATL at 8 years in masaka and improved walking. Relapsed 2 years later and has since progressively developed rt knee deformity with inability to used rt LL. o/e fgc crawls on ground with rt hip flexed and abducted, knee flexed and externally rotated-contracted. rt sole with multiple ulcers but sensate. p…	stabilization of the medial patellofemoral ligament. Through a lateral incision to the hip resected the head of femur from the base of the neck. Released the tight fibrous bands that held the hip in abduction to allow adduction		right	hip	monitor vitals and toe circulation till stable, analgesia as per prescription, ccares for knee and foot wounds daily, get posdt op xray rt knee, for fixator adjustment on Wednesday 25th may 2016		13/5/2016- foot mildly sweollen. plan,: elevate, dressing. x rays, PT. 17/5/2016- plan: dressing and PT. 17/5/2016- provide compensation shoe, couture physio. 14/06/2016- he is doing well, the fixator is holding well, there is no pintract infection, they stopped the distraction, he has a drop foot. Plan: stitch removal. Fixator care. Review in 1 month with new xrays. 19/7/2016- has a discharge ov…	orthroprosthesis	15/3/2016- seen patient came crawling on 4s. Has a functional lt lower limb, and normal upper limbs, able to stand and walk with the lt leg, good ROM lt. rt knee has a flexion, not stretchable and weak. Rx plan: ambulation on crutches, he is stable enough, strengthening upper and lt lower limb, positioning lt lower limb, issued a pair of crutches, surgeon to review and plan for the rt leg. 13/5/2…		12/3/2019- complains of pain in rt proximal thigh and hip with difficulty bending and sitting. Plan: schedule for hip osteotomy (repeat girdlestone arthroplasty)	2016-05-11	fixator exchange done		28/5/2019- seen patient off traction rt lower limb post girdlestone arthroplasty. Noted LLR rt of more than 10 cm, had a compensation shoe rt, but reports worn out. Rt knee fused in ext. he is ambulant with crutches. Rx: hip mobs rt done assisted. Muscle strengthening exs rt lower limb. for rv by ortho workshop for LLD rt. encouraged to cont exs daily at home.			2019-05-22	osteotomy of the right hip
371	2016-03-01	2016-03-24	2010-04-25	5.91389	9	F	kayunga								PIP Lt foot	2013-01-01	2.68333	3.16667		im injection gluteal			1/3/2016- supinated equinus foot	1/3/2016- progressive deformity of the lt foot x 3 years. Preceded by im injection in the gluteal region. Has been on cast at the beginning but defaulted. Oe: supinated equinus foot, toes deformed due to pressure sores. Plan: book for ATL. Meanwhile apply short leg cast and provide crutches. 15/3/2016- remanipulation done. TCA on 23/2/16 for admission.	percutaneous achilles tendon lengthening		left	heel	elevate the limb, analgesics, provide tyre shoes and crutches, keep cast for 4 weeks then AFO		26/4/2016- 4 weeks post aTL. Oe: cast off today, foot plantegrade. Plan: orthoworshop for AFO measurement and fitting. Review with AFO fitted.	AFO	1/3/2016- issued with a pair of wooden crutches 33", taught her on ambulation. She is not yet very stable. Shwon the mother how to support him while at home.
372	2016-03-21	2016-04-06	2013-07-04	2.75556	5	M	butaleja	15							PIP Right foot									21/3/2016- clubfoot point injection impression neuropathic/pIp clubfoot. Plan start serial casting as we plan for tendon achilles lengthening. Review in 2 weeks for possible admission for aTL. 31/3/2016- manipulation and casting done. Plan: foot is ready for tenotomy. for tenotomy on 8/4/16.	achilles tenotomy. Did percutaneous achilles tenotomy. Applied long leg cast with knee in flexion		right	foot	maintain pop cast for 3 weeks. Monitor toe circulation. Analgesia as prescribed		28/4/2016- patient had tenotomy for pip rt foot. Father is happy with the results. Oe: fgc afebrile. Ie: deformity corrected. Plan: to workshop for aFOs. 6/6/2016- foot is plantegrade. Plan: continue AFO for 3 months. 6/3/2017- mild PIP. Plan wean off aFO.	AFO
373	2016-03-01	2016-04-13	2002-12-02	13.3639	16	F	kayunga								PIP Right foot					im injection			1/3/2016- equinovarus with tight achilles tendon	1/3/2016- deformity of the right foot following an im injection during infancy. Oe: equino varus deformity with tight achilles tendon. Plan: manipulation and casting. Tripel arthrodesis after about 2 manipulations.	manipulation and casting		left	foot	20/4/2016- wound inspection and dressing done. 27/4/2016- debridement and wound closure. 6/5/2016- debridement and BKA. 24/5/2016- patients wound still not clean. Plan: continue daily dressing. 2/8/2016- walks well even without aFO. The foot is well positioned post triple arthrodesis. has a small clean ulcer on the anterior surface of the leg. plan: can discontinue the aFO. continue wound care. r…				1/3/2016- ambulation training using crutches done. She is stable, issued cruthces. 5/5/2016- the patient is stressed because of the long hospital stay. Done counseling and refered to the doctor. 11/4/2016- done a social ax and counseling. The patient said that she feels sad because of her conditions. she is also stimagtized at school. plan: counseling session with therapy
374	2016-03-07	2016-04-15	2011-02-02	5.20278	8	F	rakai	18							Lt PIP	2013-01-01	1.91389	3.18333						7/3/2016- reviewed a 6/f who reportedly was injected at the age of 2 and developed a rt lower limb deformity. She walks on the lateral aspect of the dorsum of the foot. i/e/: fgc afebrile. i.e: has a normal ROM of the rt ankle, the forefoot is supinated. plan: manipulation. 15/4/2016- remanipulation done. TCA on 22/3/2016. 22/3/2016- plan for STR on 8/4/2016. admit on 7/4/16, meanwhile apply cast.	manipulation and casting		left	foot	keep cast for 2 weeks, then reapply cast for another 2 weeks. Discharge when stable.		15/4/2016- reviewed pt with above history scheduled for str due to rt pip. Has had serial casting and manipulation for 1 month and shows great improvement. o/e: fgc afebrile not pale. i.e: still has residula supination deformity no equinus or adductus. plan: remanipulatie for 2 weeks, 2 wekly and review after 1 month by dr. nyiiro to plan for either tibialis anterior tendon transfer or AFOs	AFO	9/3/2016- seen her and started on ambulation with crutches. She is stable. Issued a pair of crutches and shown the care giver how to support her while at home
375	2016-03-14	2016-04-18	2006-02-04	10.2056	13	F	kabale								PIP/neuropathic club foot									14/3/2016- PIP/ neuropathic clubfoot, knee extension good, plan schedule for triple arthrodesis meanwhile start serial casting/ 3 weeks. 22/3/2016: remanipulation done. TCA on 31/3/16. 31/3/206- manipulation and castign done. For triple arthrodesis in 2/52. 7/4/2016- off the cast today, foot still rigid. plan: for triple arthrodesis of the right foot.	percutaneous achilles tendon lengthening		right	foot	elevate the limb, monitor the toes for circulation and swelling. Treat as per drug chart. Remanipulation and cast change on 25/4/2016.		24/5/2016- doing well, post aTL. The foot is well corrected. Plan: avail an afo. Review with the afo. 28/6/2016- doing well with afo, no pain, no complaints. She walks well even without the afo, no foot drop. Plan: continue with afo for night only bracing. review after 3/12 for control. 25/3/2019- there is pain in the ankle joint for 1/12 now especially when walking. she stopped using the afo a l…	AFO	14/3/2016- issued crutches and trained on ambulation
376	2016-04-14	2016-04-25	2006-08-12	9.70278	12	F	mityana	24							PIP Rt foot with LLD	2007-01-01	0.386111	9.28611					equinus deformit (14/4/2016)	14/4/2016- patient was last well at 1 year of age when she developed a swelling on the rt sheen that later formed a pus discharing sinus and was managed from a clinic and alter developed a rt foot deformity. Oe: fgc afebrile. i.e: has rigidity of the lt ankle joint with an equinus deformity. plan: book for fractional ATL.	percutaneous ATL + POP		left	ankle	monitor toe circulation, elevate the limb, keep cast for 5 weeks		31/5/2016- pop off today. Foot is in equinus and child has tenderness. Plan. Remove stitches. Remanipulate in OPD. Nsaids. Review 3 weeks for clinical control. 21/6/2016- off POP today 5/52 post achilles tendon lengthening. The foot is well positioned. plan: lets provide aFO for day time bracing. review after 6/52 for control. 21/7/2016- lt foot plantegrade. difficulty walking due to pain. has lt…	AFO	26/4/2016- afternoon session: ambulation along parallel bars and alter with crutches
377	2016-04-20	2016-04-27	2005-08-05	10.7278	13	F	lwengo								Equinus Rt in PIP								20/4/2016- pes equinovarus	20/4/2016- has been undergoing serial manipulation and casting from katalemwa. Now has severe equinus. Plan: for percutaneous aTL.	percutaneous ATL + POP		right	foot	analg as per chart		1/6/2016- off POP today 1/12 post percutaneous atl. Plan: provide AFO for full time bracing. Review after 4/52. 29/6/2016- she walks well with the aFO. Plan: contineu with afo full time bracing. Review after 3/12.	AFO
378	2016-05-04	2016-05-13	2009-02-02	7.28056	10	F	bugiri	20							Lt PIP	2013-01-01	3.91389	3.34167		gluteal iM injection			4/5/2016- lt pes equinovarus adductus		percutaneous ATL + POP		left	ankle	for remanipulation next Friday. Monitor tor circulation.		16/6/2016- pop cast is off today. Foot is plantegrade but no power in the tibialis muscles. Plan:afo day time bracing. Review after 3 months. 31/1/17- [pstt[ temdpms transfer. Doing fine. No new complaints. Plan: d/c home. Cast for 6/52 NWB. Avail crutches. avail tyre.	AFO			27/9/2016- doing well with afo. There is a foot drop and a mild flexible heel varus and adductus. Tibialis anterior and peroneii muscle are power 0 but tibialis posterior power is 5. plan: book for tibialis posterior tendon transfer in december. meanwhile continue with AFO for daytime use only.	2017-01-30	TP tendon transfer done	9/3/2017- patient had tibialis posterior tendon transfer done. Cast has been removed deformity corrected but the child has wounds on the lateral aspect of the left leg. Plan: antibiotics. Stitch removal and daily dressing. To worshop to fix AFOS. 6/4/2017- patient has no new complaints. patient has AFOs. plan: full time bracing for 6 months.	31/1/2017- seen child from the ward with below knee pop. Child reports mild pain. Trained ambulation NWB using a walker, caretaker reports she has crutches at home and knows how to use them.
379	2016-04-19	2016-05-13	2002-03-17	14.1556	17	M	Mpigi	53						c/o pain in the toes and the ankle joint,	PIP Left foot								toes in fixed flexion	19/4/2016- no swelling of the foot, plan: lets book for corrective osteotomy of the toes (MCPJ fusion)	ankle arthrodesis		left	hallux	elevate the limb, analgesics and antibiotics, check X ray, crutches NWB, k wires for 6 weeks		5/7/2016- 6/52 post arthrodesis of the left hallux. The wounds are healed, two K wires in situ. Still some metatarsus adductus. X ray: the fusion site appears united. 2 K wires in situ. Plan: remove K wires. Can bear weight as tolerated. Review after 6/52 with a new x ray for control.		16/5/2016- RX: ambulation done with a walker(NWB). Will acquire crutches from namutamba		16/8/2016- PTP of the left foot, there is still cavovarus of the left foot, it is quite flexible. Plan: lets plan for a triple arthrodesis of the left foot in the dec holidays.	2017-03-15	triple arthrodesis	21/4/2017- 5 weeks post lt foot triple arthrodesis. No problems. Dressings not septic. Plan: remove pins and reapply cast for another 6 weeks. 2/6/2017- 10 weeks post lt foot triple arthrodesis. Clinically healed. Plan:r adiological control: united arthrodesis site. get hinged AFO day and night for 6 months.	16/3/2017- one day post op. plan: gait training NWB lt LL. RX: trained ambulation in parallel bars and with crutches NWB LT LL. Availed a walking frame for the patient to be using on ward until he gets crutches.
380	2016-04-14	2016-05-27	2006-09-02	9.73611	12	F	rakai	23							Lt PIP	2012-01-01	5.33056	4.28611		IM injection		treat burns of rt foot over 4 years ago	equinocavovarus deformity lt foot	14/4/2016- h/o iM injections for treating burns of rt foot over 4 years ago. Noticed to develop weakness and difficulty walking on lt leg. p/e/ ggc. 21/4/2016- manipulation and casting done. TCA on 28/4/16. removed POP, manipulation and casting done. TCA 5/5/15. 13/5/2016- remanipulation done. TCA on 26/5/16 for admission.	percutaneous achilles tendon lengthening		left	foot			1/7/2016- cast off today. Get AFO measurement and replace cast. R.v. with aFO. 30/11/2016- doing well with AFO. No equinus but slight adductus. Tibialis anterior power 5 and posterior power 4. plan: book for tibialis anterior tendon transfer.	AFO	14/4/2016- seen and trained walking using crutches. Issued a pair of crutches
381	2016-05-23	2016-06-08	2007-05-28	9.02778	12	F	kamwenge	28							Equinus Rt in PIP	2008-01-01	0.591667	8.39444		iM gluteal injection			24/5/2016- pes equinus rt side	24/5/2016- pes equinus rt side with some cavus following IM gluteal injections when she was one year old. The deformity has been progressive. Plan: for percutaneous lengthening of the achilles tendon. 10/6/2016- post op. c/o pain. Plan: discharge	percutaneous ATL + POP		left	ankle	monitor toe circulation. Keep cast for 4 weeks.		11/7/2016- foot plantegrade. Mold and fit afo. 13/10/2016- doing well with AFO. Has no foot drop and no equinus. However dorsiflexion is limited to a few degrees. Plan: aFO for night only. Review after 3/12.	AFO	10/6/2016- issued crutches and taught crutch walking
382	2016-05-23	2016-06-15	2006-01-19	10.4056	13	M	kampala	24							PIP	2014-01-01	7.95	2.39444		quinine		malaria treatment		23/5/2016- malaria injection- quinine with weakness of left leg 2 years ago. Clinically left foot drop with weakness of extensors peroneals. TA, tibialis posterior about 5/5 foot flexible. Recommendation tibialis posterior tendon transfer.	TP tendon transfer. Through longitduinal incision over TP insertion, medial and lateral mid and distal leg and over cuboid, exposed and released medial fibers of TP form its insertion and delivered to musculotendinous junction, excised interosseous membrane and transfered TP tendon under flexor retinaculum into lateral cuneiform to correct foot deformity. noted laxity of talonavicular joint. lava…		left	foot	monitor till stable, analgesia as per drug chart, cast for 6 weeks		28/7/2016- POP off today. All surgical wounds are clean. There is active dorsiflexion of the foot. No pain is reported. Rx: refer the boy to the O/W staff for provision of aFO. Exercises for foot dorsiflexion, actively. Clinical control in 30/7. in the next month, aFO day and night.	AFO
383	2016-05-09	2016-06-22	2006-10-26	9.65556	12	M	masindi	22							Rt pes equinovarus supinatus in PIP					gluteal im injection			10/5/2016-severe pes equinovarus supinatus right side	10/5/2016- severe pes equinusvarus supinatus rt side following a gluteal iM injection. Plan: lets start with serial manipulation and casting. Review when needed. 17/5/2016- manipulation and casting done. TCA next week. 24/5/2016- 3rd manipulation and casting done. TCA 31/5/16. 31/5/2016- remanipulation done. TCA next week for cast removal and r/v by ortho surgeon. 7/6/2016- has been undergoing se…	percutaneous ATL + POP		right	ankle	monitor toe circulation. Consider triple arthrodesis or mid foot osteotomy next week		21/7/2016- the foot is in plantegrade, slight pain on manipulation. Plan: lets measure on aFO. Review with the AFO.	AFO	10/5/2016- issued out used crutches and trained on ambulation. 10/5/2016- had a counseling session with both the patient and the caretaker to deal with psycho-social problems presented. Plan: counseling.
384	2016-04-12	2016-06-28	2006-01-18	10.4444	13	F	masaka	30							PIP Rt foot	2008-01-01	1.95278	8.28056	since 2008	IM gluteal injection			12/4/2016- equinus feet, mild varus and cavus of the foot.	12/4/2016- deformed right foot x 8 years. Mother associates it with bicycle injury sustained while young. Reportedly has casting for a month while young and recurred. But also reports repeated iM injections rt gluteus. OE: equinus feet, mild varus and cavus of the foot, TP and TA function 5. plan: book for aTL but cast the foot before the proposed procedure.	percutaneous achilles tendon lengthening		right	foot/ankle	discharge home when pain controlled. NWB with crutches. Keep cast for 5 weeks the mold and fit AFO		4/8/2016- 10/f with PIP lt foot, had ATL lt foot to correct the lt foot deformity. Mother happy with the outcome. Plan: review aFOs. 3/10/2016- here for review, doing well, foot deformity progressively correcting, mother satisfied, but AFO caused rt stain irritation over lateral malleolus. plan: 1) go to workshop to plaster AFO at lateral malleolus. 2) review in 4-6 months.	AFO	29/6/2016- RX: ambulation training using crutches done. Issued crutches and pop tyre
385	2016-06-29	2016-07-07	2009-03-03	7.34444	10	F	serer	22							Rt pes equinovarus in PIP					gluteal injection			29/6/2016- equinus and inversion and adductus that is flexible.	29/6/2016- result of gluteal injection got weakness of the rt leg and foot. Had surgery (? Tendon transfer) about 2 years ago. Still has some equinus and inversion and adductus that is flexible. Plan: book for percutaneous achilles tendon lengthening.	percutaneous ATL + POP		right	foot	elevate the limb, analgesics, keep cast for 6 weeks then aFO		8/7/2016- 2nd pop -post ATL. Plan: d/c with crutches. r/v in 6/52. 2/8/2016- off POP today. Pan: provide AFO for full time. Review after 4/52.	AFO	8/7/2016- seen patient and trained ambulation using crutches. Provided a pair of used crutches and pop tyre
386	2016-06-27	2016-07-11	2010-02-12	6.41389	9	F	mpigi	14							Post injection paralysis left foot									27/6/2016- lt ctev. Plan: start with aTL, but triple arthrodesis may be necessary as well.	percutaneous ATL + POP		left	foot	elevate the foot, monitor blood supply to the toes, treatment as per chart. Discharge tomorrow.		12/7/2016- pt had ATL yesterday. POP tolerated .plan: 1) d/c, 2) r/v in 4/52 to evaluate muscle function on left limb. 11/8/2016- pop cast off today. Foot is plantargrade. Plan: afo full time bracing . 16/8/2016- given the afo today. She has the cushioned afo. Plan: review her in 2 months with day and night afos.	AFO	12/7/2016- health educated on child's condition. Ambulation in parallel bars, walker and crutches NWB. Issued a pair of crutches and a tyre.
387	2016-06-21	2016-07-25	2013-02-01	3.48333	6	F	busia	14							Lt PIP	2015-01-01	1.91667	1.47222		gluteal injection		febrile illness	21/6/2016- lt pes equinovarus adductus	21/6/2016- about a year ago, she fell sick and was given an gluteal injection that resulted in weakness of the lt foot. Now she has lt pes equinovarus adductus. Plan: for percutaneous ATL.	achilles tendon lengthening		left	foot	elevate, pop for 4 weeks		16/7/2016- 2nd pOP- ATL. Plan: d/c through PT for crutches and tire. r/v in 4/52. 25/8/2016- off casts today. Plan. Avail an AFO. Review with AFO.	AFO	26/7/2016- post atl 1/7 ago. Rx: issued POP tyre. Walking exs with frame.
388	2016-07-21	2016-08-10	2007-04-13	9.325	12	M	kayunga	30							PIP Left foot							immunization	equinus deformity with fore foot adduction	21/7/2016- 9/m was injected as a child following immunization and developed a left foot deformity. o/e: fgc afebrile. i.e: has an equinus deformity of the left foot with forefoot adduction. Plan: serial manipulation. Will need ATL in the future. 28/7/2016- manipulation and castign done. plan: fot ATL.	achilles tendon lengthening for PPP + A/KPOP		left	foot	elevate, monitor circulation, pop cast for 4 weeks		8/9/2016- pt had atl done for pIP left foot. POP removed. Foot plantegrade. Plan: 1) get afos. 2) review with afos. 16/9/16- seen patient with afos. Plan: full time bracing. 18/10/2016- 12 weeks post ATL lt side. He is using AFO full time for the last 1 month. AFO still functional. oe: foot plantigrade, wound healed. plan: AFO donning night time only. clinical control in 3 months. 11/8/2016- pt m…	AFO	21/7/2016- ambulation with crutches done. Availed crutches and precautions explained. 11/8/2016- seen and did knee mobilization exs. Provided a pop tyre.
389	2016-08-05	2016-08-19	2010-02-01	6.55	9	F	mubende	20							PIP Rt foot					IM injection to buttocks			rt foot equinocavocarus-flexible	5/8/2016- h/o IM injection to butocks earlier in life, associated with acute weakness in rt leg that lasted over 2 months. Been in mulago for maipulation and casting, referred for operative mgt. oe ambulates with crutch. Hip and knee rom and power ok. plan: schedule fractional ATL then AFO. consider triple arthrodesis above 12 years	percutaneous achilles tendon lengthening		right	heel	elevate the limb, analgesics, keep cast for 4 weeks then AFO, follow up in clubfoot clinic for prorgessive forefoot adduction manipulation then aFO.		22/8/2016- POP tolerated. Plan: 1) d/c. 2) r/v in 4/52. 9/9/2016- post aTL. Plan: get negative cast for aFO. Then remove stitches and reapply cast. r/v with AFO.	AFO	23/8/2016- had a session with the caregiver. Focused on problem solving.
390	2016-08-02	2016-08-24	2007-04-07	9.38056	12	M	mubende	20							Right PIP	2012-01-01	4.73333	4.58611					2/8/2016- equinovarus	2/8/2016- right PIP, was injected about 4 years ago, the deformity that resulted was neglected which resulted in an equinovarus of the right foot, she has had 3 casts at namutamba and the foot is flexible on manipulation. Plan: for right foot aTL but will hae 2 casts in the meantime.	percutaneous ATL + POP		right	ankle	remanipulation next week on Wednesday. Monitor toe circulation		25/8/2016- pop tolerated. Plan: 1) transfer to hostel. 1/9/2016- POP tolerated. Plan: 1) d/c. 2) r/v in 4/52.					2016-08-31	percutaneous aTL and POP
391	2016-06-21	2016-09-05	2008-07-02	8.175	10	F	wakiso	24							Lt PIP								21/6/2016- equinus, no deformity.	21/6/2016- lt foot drop in pIP. Has been casted and splint given but still has a foot drop. No equinus, no deformity. There is power grade 4 in the tibialis posterior and the peroneii muscles. Tibialis anterior is power 0. plan: book for split tibialis posterior tendon transfer in 2nd term holiday.	TP tendon transfer. Medial incision to the lt foot exposed underlying tibialis posterior tendon. Transferred tendon to the medial aspect of foot, held with vicryl 2/0 at the plantar surface of the foot. Closed incision sites fascia with vicryl 3/0 and skin with nylon 3/0 dressed incision sites applied B/K pop cast foot at plantegrade monitored for peripheral circulation.		left	ankle			5/9/2016- cast in good condition, good peripheral circulation. plan: d/c POP 6/52. cast for 6/52. r/v 4/52 for clinical assessment. 18/10/2016- off POP today. The wounds healed. Plan: remove stitches. Provide afo with a hinge for full time bracing. PT dorsiflexion exercises. Review after 4/52 for control. 15/1/2016- walks well with the afo. The afo has caused small ulcers on the foot. plan: to th…	AFO	6/9/2016- seen patient and trained ambulation using crutches NWB lt lower limb provided crutches. 18/10/2016- rx: assisted active exs ankle jt, bridging, ambulation training, r/v next hospital visit. 21/10/2016- reviewed patient, walks with a liimp, weaned off one crutch, taught proper gait. care taker advised to continue exs at home. plan: r/v 4/11/16 to continue with dorsiflexion exs. 13/12/201…
392	2016-08-02	2016-09-14	2009-02-02	7.61667	10	M	iwengo	25							PIP Left	2011-01-01	1.91389	5.58611					equinovarus	2/8/2016- pip at 2 yo, has had a deformity of the limb since not corrected. The foot is in equinovarus, with the boy walking on the dorsum of the foot. Plan: serial castings then consider either aTL, tendon transfers or triple arthrodesis. 9/8/2016- manipulation and castign done TCA next week. 18/8/2016- manipulation and castig done. TCA next week. 25/8/2016- manipulation and casting done. TCA ne…	percutaneous ATL + POP		left	ankle	monitor toe circulation, keep cast for 4 weeks		13/10/2016- patient ha aTL done for a PIP left foot now is much better but still has an adductus of the right forefoot. Plan: avail afos for full time bracing. Review with AFOs. 10/1/2017- bruised due to tight aFO. Plan: discard afo. Review in 2 weeks to measure new afo. abx for now. 24/2/2017- foot is dorsiflexible. plan: continue afo. r/v in 6 months or if afo borken. 27/2/2018- right foot stil…	AFO	3/8/2016- issued a pair of crutches and ambulation trained NWB. 18/8/2016- the caregiver is a 32 yo mother of six children. She is overwhelmed and has a low social support system. Done counseling to offer emotional support and discussedt he child safeguarding policy as well. 23/8/2016- the caregiver is overwhelmed. complained that the child does not listen to her and that he has anger problems. d…		27/2/2018- right foot still in equinovarus, walking on the side of the left foot, plan for triple arthrodesis left foot.	2018-05-21	triple arthrodesis					2018-05-30	manipulation and casting	11/7/2019- 6/52 post triple arthrodesis, cast has been removed. Wound is clean and dry. Plan: apply below knee cast for 4/52. review in 1/12 for cast removal and measure of aFOs ambulate with crutches. 27/8/2018- plantegarde foot. Mold and fit aFO.	22/5/2018- s: 1st day post, he has no pain. Consented to therapy. mother reports he outgrew the crutches and has no money today. Rx: trained ambulation with a walker. Plan: see social worker to see possibility of acquiring crutches. 25/5/2018- seen patient ambulant with a walker/ wheel chair. rx: issued crutches, ambulation nwb trained, patient knows how to walk with crutches
393	2016-08-30	2016-09-19	2006-07-12	10.1861	12	M	kayunga	27							Equinus Rt foot in PIP					im injection in right buttock			30/8/2016-equinus	30/8/2016- equinus rt foot result of iM injection in the right buttock as a child. Was treated for it and improved. He reportedly was beaten by a teacher 6/52 ago and the right lwoer limb became weak. He also reportedly stopped speaking 3/52 ago. o/e: no deformity but the foot cannot dorsiflex beyond neutral position. plan: book for percutaneous ATL. meanwhile review by clinical psychologist.	achilles tendon lengthening		right	ankle	elevate limb, monitor peripheral circualtion, analgesics, antibiotics		19/9/2016- doing well, foot in maximum dorsiflexion, toes pink. plan: cast for 4/52. cast removal for 4/52 then AFO. r/v in 4/52. 18/10/2016- off POP 4/52 post ATL. The mother reports that he is now talking but is unable to walk due to weakness of the lower limbs. Plan: provide aFO for full time bracing. PT review and ambulation exercises. Review after 4/52 for control.	AFO	18/10/2016- reviewed child who had ATL done in sep 2016. o/e: has weakness bil lwoer limbs. Cause. Normal tendon reflexes. Normal muscle tone. Plan: discuss with clinical psychologist. Conversion disorder. Refer to social worker to link with ACHERU, socio-economic challenges.
394	2016-01-18	2016-09-20	2007-04-03	9.46389	12	F	buikwe	22							PIP								equinovarus deformity	18/1/2016- pip with neuropathic club foot left side. Plan start serial casting, might need atl and eventually afo. 28/1/2016- manipulation and casting done. TCA on 4/2/2016. 4/2/2016- m+c done. r/v next week by ortho surgeon. 11/2/2016- has come off POP today provide afo and review with afo. 16/5/2016- straps worn out. foot has residual equinovarus deformity. plan workshop to replace straps. will…	calcaneal osteotomy. Oblique incision, protected the peroneal tendons, calcaneal osteotomy with lateral translation and pinning done.		left	foot	drugs as per chart, elevate foot on pillows, split cast PRN		26/10/2016- pop removed, patient on clutches, k wire exposed. Pan: x ray rt foot. Good calcification, stitch removal, partial weight bearing. K wire removal. Caps cloxacillin 250 mg qidx 5/7. tabs ibuprofen 200 mgs tdsx 5/7. review on 19/1/17 clinical assessment. 19/1/2017- doing fine ambulating well no new complaints, calcaneovarus well corrected. plan: ct afo. review in 3 months clinical assess…	AFO
395	2016-09-02	2016-09-21	2008-06-18	8.25833	11	M	tororo	23							Rt PIP	2008-07-01	0.0361111	8.16944		quinine injection			2/9/2016- equinus and supination	2/9/2016- mother report progressive rt foot weakness then deformity following im quinine 8 years ago. Oe: gc. Rt foot in equinus and supination. Plan: book for fractional ATL then aFO. Class 1b, 3 days. 19/9/2016- no neuro deficities. Plan: triple arthrodesis. 20/10/2016- doing fine post triple arthrodesis ambulating well on cast without clutches. no new complaint plan: remove cast, review withou…	achilles tendon lengthening		right	ankle	elevate limb, NWB with crutches. Drugs as per chart. Will keep cast of 5 weeks.		21/9/2016- post percutaneous ATL, doing fine, cast well tolerated. toes pink. no new complaints, resting in bed, foot in plantegrade. plan: ci rx. elevate limb. 22/9/2016- post ATL. plan: ambulate on crutches. evaulate for rt foot. provide tyre and crutches. PT. d/c through physio. 3/5/2017- walks well with the AFO but still has a foot drop. Tibialis anterior and peroneii muscles are power 0 whil…	AFO
396	2014-08-21	2016-10-03	2010-07-17	6.21111	8	F	buikwe	13							Rt PIP								21/8/2014-foot drop, no equinus	21/8/2014- seen this child with a foot drop. No equinus but with a strong tibialis posterior. Plan: will need a tendon transfer in the future. Provide an AFO. Review after 6/12. 26/3/2015- rt foot PIP with forefoot adductus on aFO hinged. AFO wasted with loss of lat screws, not fitting. plan: continue with PT, provide new AFO with hinge measurement. review with new AFO adn 6/12 to plan tendon tra…	percutaneous achilles tendon lengthening		right	foot	elevate the limb and monitor for swelling. Analgesics. Keep cast for 4 weeks		2/11/2016- off POP today. No equinus. Plan: provide AFO with a hinge for full time bracing. Review after 4/52 for control.	AFO	4/10/2016- trained crutches PWB
397	2016-09-19	2016-10-07	2012-12-24	3.78611	6	M	apac	14							Pes cavovarus in PIP Rt foot	2016-01-01	3.01944	0.716667		gluteal injection		malaria treatment	19/9/2016- pes cavovarus of the right foot	19/9/2016- had gluteal injection for treatment of malaria several months ago and hen developed deformity of the foot rt side. Oe: paralytic pes cavovarus of the rt foot, pat is able to walk but has a cavovarus drop foot, pat is not cooperating, so no evidence of motoric of neurofunction availed. plan: ATL and plantafasciotomy for now, then apply aFO for some time. in future tendon transfer should…	percutaneous ATL		right	ankle	elevate limb, monitor peripheral circualtion, analgesics, antibiotics		10/10/2016- doing fine, no new complaints. Toes pink, foot at plantegrade. cast well tolerated. plna: d/c home. ci rx. avail tyre. 3/11/2016- foot plantegrade. The child is not cooperative and the muscle power inclincation not possible. Plan: aFO with joints at the ankle. To review in 6/12 for re evaluation of the muscle power.	AFO	10/10/2016- availed the pop tyre. Ambulation trained with axillary cruthces. NWB rt LL. Patient not yet stable with crutches. Plan: patient to be reviewed after lunch.
398	2016-09-23	2016-10-07	2012-05-18	4.38611	7	M	apac	27							Rt foot PIP	2015-01-01	2.61944	1.72778					23/9/2016- equinus	23/9/2016- h/o illness treated with injection one year prior to this visit sustaining weakness rt foot with progressive cavus deformity no h/o medical intervention. Active TA and TP tendons. Equinus deformity with fore foot adduction.book for aTL and TA tendon transfer.	percutaneous ATL		right	ankle	monitor peripheral circulation, elevate limb, analgesics, antibiotics.		1010/2016- doing well, toes pink, foot at plantegrade. cast well tolerated. plan: d/c home. ci rx. provide tyres. 3/11/2016- post aTL, RT foot no new complaints. Plan: caps cloxacillin 250 mgs qid x 5/7. avail aFO. Review with aFO. Afo x 3/12. review on 24/1/17 clinical assessment. 24/1/2017- doing well on aFO. Still has a foot drop but no other deformities. Plan: to ortho workshop for replacemen…	AFO	10/10/2016- availed the pop tyre. Ambulation trained with axillary cruthces. NWB rt LL. Patient not yet stable with crutches. Plan: patient to be reviewed afer lunch.
399	2016-09-13	2016-10-14	2007-01-01	9.78611	12	F	kyenjojo	23							Rt pes equinovarus supinatus in PIP	2012-01-01	5	4.7		IM gluteal injection			13/9/2016- right pes equinovarus supinatus	13/9/2016- was well until 4 yeasr ago, that she developed progressive clubbing of the right foot following on injection in the buttocks. Has right pes equinovarus supinatus. Plan: start with serial manipulation and casting then percutaneous ATL. 20/9/2016- manipulation and castign done. TCA next week. 27/9/2016- there is improvement on serial manipulation and casting though still has a severe equ…	percutaneous ATL + POP		right	ankle	monitor toe circulation, keep cast for 4 weeks, will benefit from triple arthrodesis in future.		17/10/2016- pt had ATL foot still in equinus. plan: 1) transfer to hostel. 2) for remanipulation on friday. 21/10/216- doing fine, no major concerns, baby asleep. toes prick, cast well tolerated. 22/10/16- no new complaints. toes pink, cast well tolerated. foot at plantegrade. plan: ci Rx, elevate limb, still out of bed, avail crutches monday. 23/10/16- toes pink. cast well tolerated. no new comp…	AFO	24/10/2016- seen patient, issued a pop tyre and ambulated the patient pwb out door in grass and in door at the department.
400	2017-07-08	2016-10-17	2008-02-19	8.66111	11	F	mukono	32	145.7						Rt PIP	2009-01-01	0.866667	8.51944		IM injectio to gluteus			rt foot in equinus and supination	8/9/2016- rt foot deformity since one year of age. Followed iM injection to gluteus. Rt foot in equinus and supination. Plan: schedule for fractional ATL. Get CBC. 15/9/2016- manipulation and casting done. TCA next week. 22/9/2016- remanipulation done. TCA next week for cast removal +R/V by ortho surgeon. 29/9/2016- manipulation and castign done. plan: TCA next week for cast removal and R/V by or…	percutaneous achilles tendon lengthening		right	foot	elevate the limb, monitor the toes for circulation. Treat as per drug chart. Discharge when comfortable with cast for 4/52.		18/10/2010- pt had ATL yesterday, POP tolerated. Plan: 1) DC, 2) R/V in 4/52. 22/11/2016- off POP today 1/12 post percutaneous aTL. The foot is well positioned and flexible. Plan: provide an aFO with an hinge for the RT side. Review after 4/52 for control. 20/12/2016- reports aFO fell and got dismantled a week ago. Otherwise no major issues. oe: varus midfoot, hindfoot good, no equinus. plan: ort…	AFO	18/10/2016- availed pop tyre and taught gait PWB
401	2016-10-11	2016-10-24	2007-06-01	9.39722	12	F	wakiso	23							Equinus Rt in PIP					gluteal iM injection			equinus rt foot	11/10/2016- has equinus rt foot following a gluteal IM injection. No other deformity. The foot is in otherwise neutral position. Plan: book for percutaneous ATL.	percutaneous ATL + POP		right	ankle	monitor toe circulation. Keep cast for 4 weeks		22/11/2016- off POP today, the foot is well positioned and flexible. Can dorsiflex. Plan: provide an aFO with a hinge Rt side for daily bracing. review after 4/52 for control. 20/12/2016- nearly 8 weeks post ATL rt leg. no major issues. oe: normal feet now, has wound with cellulitis on the 2nd toe, weak TA and TP grade 4. plan: caps cloxacillin 250 mg qidx 14 days. brufen 200 mg tds 5 days. wound…	AFO	25/10/2016- c/o pain in the rt ll. O: she had a below knee POP cast. Able to actively flex and extend the Rt knee joint AROM 0-120 degrees. Rt LL muscle power 4/5. plan: to maintain the rt knee ROM. To improve Rt LL muscle power from 4 to 5. for the child to be able to actively take part in the play activities.
402	2016-09-13	2016-10-31	2000-05-31	16.4167	19	F	masaka	46							PIP Lt foot	2006-01-01	5.58611	10.7		IM gluteal injection			13/9/2016=-hindfoot varus cavus of mid foot mild equinus. 17/9/2016- manipulation and casting done. TCA in 2/52.	13/9/2016- progressive deformity of the lt foot x 10 years. Results of injection into the gluteal region. Been on pt in masaka hosp. oe: hindfoot varus cavus of mid-foot mild equinus. Plan: will benefit from triple arthrodesis lt. foot. Do RCT+ CBC. 27/9/2016- manipulation and casting done. TCA in 2/52. 11/10/2016- remanipulation done. plan: for triple arthrodesis in 2/52.	triple arthrodesis		left	foot	elevate the limb. Analgesics and antibiotics. Wound inspection and cast change next Monday.		31/10/2016- post op. no new complaints. toes pink, foot at plantegrade. cast set. plan: ci elevate limb, ci rx. 1/11/2016- 1st day post triple arthrodesis, POP tolerated, plan: 1) admit to hostel, 2) cast change. 7/11/2016- wound inspection and remanipulation done without anaethesia. patient can be discharged if she is OK. doing fine. no new complaints. plan: ci Rx, elevate limb. 8/11/2016- doing…	AFO	13/9/2016- seen patient, trained ambulation using crutches, she is very stable. Provided crutches.
403	2016-09-29	2016-11-04	2006-02-01	10.7583	13	M	kamuli	25							Rt PIP							febrile illness	29/9/2016- equinus of the ankle joint and heel varus	29/9/2016- 10/m who was injected as a child when he had a febrile illness later developed a deformity of the right foot and walks on the lateral aspect of the forefoot. o/e: fgc afebrile. Ie: has forefoot adduction and supination. With slight equinus of the ankle joint and heel varus. imp: rt pip. plan: serial casting will need triple arthrodesis later. 13/10/16: removed cast, 2nd manipulation an…	percutaneous achilles tendon lengthening		right	ankle	elevate the limb, monitor peripheral circulation. Analgesics. Antibiotics. POP for 4 weeks.		2/12/2016- afo fitting foot at plantegrade, toes pink. Plan: afo night and day. Review in jan for clincial assessment 24/1/17 with afo. 27/1/2017- on aFO reportedly lost it slower straps, foot still in good condition. Foot ROM poor. Plan: renovate afo. review on 28/2/17.	AFO
404	2016-10-31	2016-11-21	2011-02-01	5.80556	8	M	iganga	17							Right PIP (equinus foot)	2015-01-01	3.91667	1.83333		IM injection			equinus right foot	1/11/2016- h/o rt lower limb paresis following treatment with IM injections, 1 year prior to this visit, later on associated with progressive weakness, drop foot with a slapping gait bearing weight on the lateral border of the foot. Had surgery done at buluuba hospital for aTL last year october. i/e: fgc with right drop foot, compensatory gait movement. achilles tendon scar. no active tendon asse…	percutaneous ATL + POP		right	foot	elevate the foot, monitor blood supply to the toes, pOP for 4 weeks, then AFO.		20/12/2016- 6 weeks of POP, off cast today. Plan: avail an Afo, review with the AFO, AFO for 4 months, day and night. 20/4/2017- patient has no new complaints, has been using the AFO day and night. Mother reports some improvement. i.e. still has a foot drop plan: day time bracing x 6/12. 31/10/2017- still has foot drop. plan: repair the AFOs full time use.	AFO	22/11/2016- patient post ATL presented with a below nee POP cast in the RT LL. Rt knee ROM 15-140 degree, muscle power LT LL 5/5, rt LL 3/5. plan: improve muscle power for rt LL from 3/5 to 4/5. for the patient to be able to ambulate with crutches. RX: AROM exers rt knee joint 10 reps. bilaterall LL straight leg raises 10 reps. availed axillary crutches and POP tyre.
405	2016-01-11	2016-12-01	2002-12-24	13.9361	16	M	ntungamo	44	172.3						PIP Rt foot	2007-01-01	4.01944	9.02778		IM quinine injection			equinus foot and forefoot adduction	12/1/2016 slapping gait. Strong TP tendon function. Weak/absent TA power. Plan: book for TPT transfer during long school holidays. Meanwhile provide aFO in ortho workshop.	triple arthrodesis		left	foot	monitor till stalbe. Analgesia as per drug chart. Keep foot elevated on pillow. Provide crutches for NWB. Change cast after 2 weeks. Cast for 8 weeks Wednesday 14/12/2016.		13/1/2017- cast off. Take out stitches. Provide aFO- day. r/v in 3 months. 18/5/2017- patient still has a foot drop. Plan: aFOs for 6 months. 30/1/2018- still has a foot drop. Not using an aFO (it got destroyed). Plan: replace the afo. Continue with afo for ambulation. review in case of need.	AFO	2/12/2016- x/o of dizziness and pain in the right leg. Rx: availed a Pop tyre. Trained ambulation in parallel bars. Plan: to be reviewed after lunch to further train ambulation with crutches. 2/12/2016- post TPT with Pop cast. The patient is complaining of dizziness. plan: to train ambulation. rx: availed a POP tyre. trained ambulation in parallel bars NWB rt LL. r/v after lunch to train ambulati…
406	2016-09-06	2016-12-02	2002-01-01	14.9194	17	F	wakiso	36							Rt PIP	childhood						malaria treatment	forefoot adduction. No equinous.	6/9/2016- 14 f developed a deformity of the right foot following an injection in childhood for malaria treatment. Had serial casting from mulago and tibialis posterior tendon transfer from mulago. The deformity recurred. Plan: serial casting then aFOs if successful. 13/9/ 2016- manipulation and casting done. TCA in 2/52. 27/9/2016- patient has been undergoing serial casting of the right foot with…	shortening of lateral column. Through a lateral incision to the midfoot resected the calcaneocuboid joint to correct the adductus.		right	foot	elevate the limb, monitor the toes for circulation. Treat as per drug chart. For wound inspection and cast change after 1/52.		10/1/2017- 5 weeks post lateral column shortening rt foot. No major issues. Oe: cast off today, foot looks good at the lateral border, wound healed. Plan: ortho workshop for aFO. Clinical and radiological control in 4 weeks. Continue using crutches. 14/2/2017- she has been on teh AFo for 4 weeks, she still has a drop foot, plan: continue using the AFO day and night for 4 months, review her in 4 m…	AFO	6/9/2016- trained ambulation using crutches. Provided second hand crutches.
407	2016-09-05	2016-12-02	1999-11-21	17.0306	19	M	Kampala	43							Rt PIP + gluteal fibrosis	2015-01-01	15.1111	1.67778		quinine			5/9/2016- equinus deformity of the left foot	5/9/2016- 16 m was injected with quinien at about 1 year and he developed a deformity of the right foot. Had surgery from a hospital in kumi to correct the deformity at about 5 years and reports no improvement. i/e: normal ROM of the right knee. Plan: book for mid foot osteotomy. 1/12/2016- in theater: noted the above patient previously booked for a triple arthrodesis due to a severe equinous 2 *…	percutaneous achilles tendon lengthening		right	foot	elevate limb, treat as per drug chart, monitor peripheral circulation, analgesics, antibiotics, monitor vitals		16/1/2017- knee flexion to 90*. Foot plantegrade. Plan appy walking cast, continue with PT. review in 4 weeks for cast removal. Schedule for gluteal release next holiday.		5/12/2016- did ambulation training using a walker and crutches, he is stable with crutches. Trained stair climbing up and down 3x. Provided crutches.
408	2016-11-08	2016-12-07	1999-01-01	17.9333	20	F	gulu	40							PIP Lt foot	2001-01-01	2	15.8528		IM gluteal injection			arus and equinus in extension	8/11/2016- progressive deformity lt foot x 15 years. Sequelae of IM injection LT gluteal region, treated severally but no improvement no previous surgery. Oe: varus and equinus in extension. Plan: let us start with soft tissue surgery 1st: book for fractional ATL lt leg.	percutaneous achilles tendon lengthening		left	ankle	elevate limb, analgesics, antibiotics, monitor peripheral circulation. Monitor vitals 2 hourly.		2/2/2017- Pop cast removed today, patient doing fine no new complaints, good foot ROM. Plan: avail aFO. Review with aFO. Afo day and night. Meanwhile reapply cast until aFO is ready. Review in 6 months 3/8/17 clinical assessment.	AFO	8/12/2016- seen patient and trained ambulation using a walker and crutches. Patient is stable she walked from therapy activity room up to outside to and from. Issued crutches.
409	2016-12-06	2016-12-19	2013-07-23	3.40556	5	F	kampal	14							PIP Rt foot								6/12/2016- equinus	6/12/2016- h/o injection neuritis, leading to an equinus foot, she is walking with the foot in equinus, no pain, slight cavus. No intervention yet. Clinically: foot in equinus, she walks without pain. Plan: fot aTL right foot. Meanwhile apply a cast till then.	percutaneous ATL		right	ankle	elevate limb, analgesics, antibiotics, monitor peripheral circulation		24/1/2017- patient had aTL done 1/12 ago, cast off. Plan: review with aFOs, full time bracing for 6/12. 12/5/ 2017- foot now ok, off aFO. Rv in 6 months.	AFO
410	2016-11-16	2017-01-02	2008-06-16	8.54444	11	M	wakiso	22							Lt PIP	2010-01-01	1.54167	6.875					16/11/2016- lt pes equinovarus supinatus in PIP.	16/11/2016- let pes equinovarus supinatus in PIP. Injection given 6 years ago. Plan: lets start with serial manipulation and casting then percutaneous ATL. 24/11/2016- manipulation and casting done. TCA next week. 1/12/2016- cast off. M+C casting done. TCA 8/12/2016. 15/12/2016- patient has been undergoing serial casting. still has an equinus foot. plan: book for aTL.	percutaneous ATL + POP		left	ankle	elevate limb, monitor vitals 2hrly and record. Monitor peripheral circulation. Analgesics. Antibiotics. POP cast for 4 weeks.		7/2/2017- foot is in a good position, off the cast today. Plan:a vail an aFO. Review with the AFO. 22/5/2017- patient has a nontender swelling on the left foot. The deformity corrected. Plan: use AFOs for night time bracing.	AFO	3/1/2017- one day post ATL with a below knee POP cast. He is ambulant with axillary crutches. Plan: to avail a POP tyre and train ambulation . Rx: availed a POP tyre. Trained ambulation with the POP tyre on.
411	2016-11-23	2017-01-02	2000-12-20	16.0333	18	M	Mbale	55	166						Rt PIP	childhood				IM gluteal injection			pes equinovarus supinatus		percutaneous ATL + POP		right	ankle	elevate limb, monitor vitals 2 hrs, monitor peripheral circulation, analgesics, antibiotics, POP cast for 4 weeks then review to plan on triple arthrodesis right ankle		8/2/2017- still has equinus foot varus deformity post aTL. Plan: book for triple arthrodesis. Meanwhile re apply POP cast.		3/1/2017- rx: did ambulation on walking frame, education walking on crutches, availed POP tyre, precaution for crutches educated, weight bearing as pain allows			2017-04-03	triple arhtrodesis					2017-04-10	manipulation and casting	30/5/3017- off POP today, 8/52 post tripel arthrodesis. The wound healed. The foot is well positioned. Plan: remove stiches. Review after 4/52. 27/6/2017- reports pain in the ankle especially when he walks on it. There is also some swelling. Otherwise the position of the foot is good. plan: review afer 6/12 for clinical control. meanwhile analgesics PRN.
412	2016-06-27	2017-01-04	2013-12-30	3.01111	4	F	wakiso	17	105.8						PIP with foot drop	2016-05-01	2.33611	0.155556		malaria			equinus of right foot	27/6/2016- right foot drop after injection for malaria 4 weks ago. Clinically right foot drop. Plan AFO. 8/8/2016- right foot drop. Continue with Afo and physiotherapy. Review in 3 months. 10/10/2016- using Afo with right PIP. Foot flexible at ankle joint. AFO in good condition. plan: CT AFO + physiotherapy. review in 6 months 13/12/2016- cinical assessment. 13/12/2016- foot is in equinus, pain o…	percutaneous ATL + POP		right	ankle	elevate limb, monitor vitals 2rly. Monitor peripheral circulation. Analgesics. Antibiotics.		2/2/2017- doing fine no new complaints. Cast removed today, foot has good dorsiflexion. Plan: avail AFO night and day. Review in 6/12 to plan on possible tendon transfer 3/8/17. 4/12/2018- she has a slight varus foot. The foot is in neutral position. plan: avail an AFo. review her with the AFO for day time use. 6/5/2019- the foot is neutral. review in 6/12.	AFO	5/1/2017- noted child too young to ambulate with crutches. Rx: did walking exercises on parallele bars. Child able to walk without any support. Availed POP tyre
413	2015-02-03	2017-01-04	2003-10-25	13.1917	15	M	wakiso								PIP left foot					quinine injection			3/2/15- cavovarus	3/2/2015- PIP left foot, child walks with a foot drop, foot in cavovarus, weak TP/TA tendons. Plan: measure an AFO, review with aFO. 29/2/2016- h/o injection (quinine) at 2 years followed by paralysis of the foot. Patient seen in katalemwa in november 2015 where aFO was given. he comes for foot deformity (varo-supination). no fixed equinism. o/e: varo-supination of the foot. scars along the achil…	Calcaneal osteotomy. Oblique incision over the dorsum of the foot to expose the subtalar, calcaneocuboid and talonavicular joints, cleaned the soft tissues to expose the joints, denuded all joints of cartilage and performed osteotomies to achieved the desired correction, lavage of the wound. filled with bone graft from the removed fragments, closer in layers, nylon 2/0, vicryl 2/0. dressings appl…		left	foot	abx and analg as per chart, final cast, change unless blood filled for EUA, cast for 8 weeks then AFO.		21/2/2017- he is doing well, the stitches are still in situ. Plan: lets avail an AFO. Review with aFO. 7/3/2017- seen patient with aFOs. Taught patient how to use AFOs. Plan: full time bracing x 6/12.	AFO	5/1/2017- patient seen: one day post lt foot triple arthrodesis with a below knee POP cast. Lt knee ROM 0-100 degrees. Gross UL muscle power 5/5. plan: to avail crutches and train ambulation NWB lt LL. Rx: trained ambulation in parallel bars. Later trained ambulation with a pair of axillary crutches in the therapy corridor and the hospital walk way. availed a pair of axillary crutches.
414	2016-12-07	2017-01-11	2010-02-06	6.93056	9	M	kampala	17							PIP right leg	2011-10-01	1.65278	5.18333		quinine injection		febrile illness	7/12/2016- equinus rt foot. No valgus/ varus.	7/12/2016- at 1.5 years, got sick and given quinine injection, followed by weakness rt leg. Now walks with equinus rt foot, which is fused. No valgus/ varus. ROM full rt knee extension - atropic leg rt. Lt side: foot, ankle dorsiflexion to neutral. Rt seems to have some EHL and TP function. plan: percutaneous ATL and POP. at the removal of POP, re-evaluate for muscle function (eventually tendon t…	percutaneous ATL + POP		bilateral	ankle	keep cast for 4 weeks. Monitor toe circulation		14/2/2017- the right foot is in plantegrade position, he is off the casts today and he is walking well, he had casts on both feet. Plan: avail an aFO for the right leg. Review him with the AFO. 20/4/2017- he is doing better, still has a weakness of the TA/TP tendons, power 3/5, slight drop foot when he walks. plan: continue to use the aFO daily during the day. review in 4 months.	AFO	12/1/2017- reviewed patient, trained crutch walking. Patient not stable with crutches yet. Plan: admit to hostel for ambulation training. 4/v tomorrow. 13/1/2017- seen patient. The mother reports that the child feels a lot of pain in the rt leg esp on standing and walking. o/e: patient presented with bilateral above knee POP cast. noted that the rt toes were swollen and he was unable to move them…
415	2016-11-29	2017-01-11	2004-04-13	12.7444	15	F	mityana	26							Rt PIP	2007-01-01	2.71667	9.91111		gluteal im injection			30/11/2016- severe equinus of right foot		percutaneous ATL + POP		right	ankle	book for triple arthrodesis next week. Monitor toe circulation.		14/2/2017- post percutaneous aTL, doing fine no new complaints. Cast removed today. o/e: foot at plantegrade. Plan: avail AFO night and day. Review in 3 months clinical assessment with AFO. Ct clutches. 17/5/2017- post left percutaneous ATL, now with aFO night and day ambulation well foot at plantegrade. plan: ambulate freely. review in 3/12. continue with AFO night and day. review on 29/8/2017. …	AFO	12/1/2017- seen patient on pop rt lower limb, upper limbs normal. Trained ambulation using crtuches through therapy corridor to and from 3 times. Stair climbing using crutches, walking up and down 3 times provided crutches, continue training stair climbing with crutches. 17/1/2017- she bends knee while walking. taught to mobile knee to avoid contracture. provided a pop tyre.
416	2016-03-03	2017-01-13	2002-12-29	14.0389	16	F	kayunga	33							PIP right foot	2011-01-01	8.00556	5.17222	since 2011				3/3/2016- Cavovarus foot with hindfoot varus.	3/3/2016- 5 year h/o injection paralysis, she was given an AFO but the deformity progressed cinically. Cavovarus foot with hindfoot varus, rigid on manipulation. Plan: for triple arthrodesis during dec holidays. 2/12/2016- back for surgery. Has power 5 in TP adn power 2 in TA. equinovarus in rt foot deformity. plan: weekly manipulation. schedule for TP tendon transfer in 4 weeks- class 3, 5 days.…	Calcaneal osteotomy. Through a lateral incision to the midfoot resected the calcaneocuboid joint to correct the adductus.		right	foot	elevate the limb. Monitor the toes for swelling and circulation. Treat as per drug chart. For wound inspection after 1/52 and final cast in OPD.		28/2/2017- patient had a right triple arthrodesis. Cast has been removed. Plan: to workshop for aFOs. Review with afos. 1/3/2017- patient has been given AFOs. Taught parents how to use afos. Plan: full time bracing x 6/12.	AFO	8/12/2016- seen patient after manipulation and casting rt lower limb. Did ambulation training using a walker and crutches, to and from activity. Room up to outside, she is stable, crutches provided. 16/1/2017- seen patient she reports pain at the ankle jt. advised caretaker to look at the toes often in case they become darker. she couldn't move her toes. trained ambulation nwb.
417	2017-01-12	2017-01-20	2011-06-15	5.59722	8	M	rakai	15	114						PIP left foot										bone cement removal. Found a small ulcer on the plantar surface of the big toe. Debrided the edges and the floor plus the surrounding skin. Cleaned and dressed.		left	hallux	elevate the limb. Treat as per drug chart. Dress after 1/7		21/2/2017- he still has drop foot, the wound is still draining. Plan: lets avail him with an aFO and continue with the dressings. Review him in 1 month after daily dressings.	AFO
418	2014-02-17	2017-01-20	2005-07-01	11.5528	13	F	kampala								PIP left foot									17/2/2014- PTP with weak dorsiflexors, peroneals and tibialis posterior and anterior, tight intrinsics. Plan serial casting weekly for two weeks. 11/3/2014- PIP left foot, has been under going manipulation. Foot fairly corrected. Plan: mold and fit AFO when ready. 25/3/2014- well corrected foor. mold, recast, and fit AFO when ready. 3/4/2014- well corrected and fitted with AFo. review in 3 months…	triple arthrodesis		left	foot			9/3/2017- off the cast today, stitches in situ, big toe is still plantar flexed, will need a release later. Plan: remove the stiches. Avail AFO. Review with AFO. 3/4/2017- result of left PIP doing fine foot at plantegrade with cast removed. Plan: avail AFO. review with AFO. review in 3/12. 11/4/2017- she had a knock to her foot recently and now the foot is painful and swollen, no signs of a fract…	AFO	23/1/2017- seen patient from the ward. Ambulation done with a walker. Measured for crutches 43". Sent to the department to be trained and availed. 23/2/107- 3 days post op with POP. Plan to train ambulation with crutches NWB Lt LL. Rx: trained ambulation in parallel bars and with axillary crutches NWB Lt LL. measured for crutches size 43" fitting size of new crutches not available. availed used c…
419	2017-01-02	2017-01-23	2010-10-18	6.26389	8	F	Butalejaj	17							PIP Rt foot with equinus deformity	2011-01-01	0.202778	6.00278		quinine in buttock			equino-varo-supinatus foot.	2/1/2017- foot flexible, correctable. No activity in TA. Grade 2 activity TP. 10/1/2017- cast off. 2nd manipulation and casting done. Awaits ATL	percutaneous ATL + POP		right	foot	elevate the foot, monitor toes perfusion. Treatment as per chart.		28/2/2017- she is doing well, off the cast today, still has inactive TP/TA tendons. Plan: avail an Afo, review with AFO. Review in 3/12. 5/3/2018- the foot is plantegrade. Plan: review in 6/12 for clinical control. 3/9/2018- no major issues. The foot is plantegrade. plan: to come again in 6/12 for r/v.	AFO	2/1/2017- the father reports that the child was injected with quinine and later developed a problem with the rt leg. o/e: child brought in with rt LL POP casdt. Has good upper limb funciton. Plan: to train ambultion with axillary crutches. Rx; trained ambulation in parallel cars.
420	2016-12-01	2017-01-23	2006-02-12	10.9472	13	F	mukono	29	135.2						Cavovarus foot ?? PIP				deformity since 2010				varus foot rt> lt.	1/12/2016- at 4 years, rt foot deformity varus/ cavus. No treatment so far. Pain rt foot at lateral ankle when walking a lot. Pe: varus foot rt>lt, can be corrected to neutral. Rx: for tibialis posterior tendon transfer.	TP tendon transfer. Anteromedial approach to expose the TA tendon, made another incision over the middle cuneiform bone, made a tunnel in the bone. Secured the tendon using a. passed the tendon into the foot and secured with a button and sutures, lavage, closure in layers. tourniquet off, toes pink. applied a below knee POP cast.		right	foot	abx and analg as per chart		9/3/2017- off the cast today. Plan: avail an afo. Review with the afo, meanwhile reapply the pop.	AFO	24/1/2017- seen from opd, trained crutch walking NWB, but will get her crutches from acheru.
421	2016-12-08	2017-02-27	2001-02-27	16	18	M	Buikwe	49							PIP Rt foot	2011-01-01	9.84444	5.93611		quinine			equino-caro-cavus. Can be corrected to neutral.	8/12/2016- pain over 5th ray. PE: gait; equino-varus. Bears weight on 5th ray. Plan: triple arthrodesis and IP fusion	triple arthrodesis		right	foot	elevate the limb, monitor fthe toes for perfusion. Treat as per drug chart. For wound inspection and final cast after 1/52.				30/1/2017- three days post op. patient reports that she is doing well. Plan: to train ambulation in parallel bars and with crutches NWB rt LL. Rx: trained ambulation in parallel bars NWB rt LL, measured for crutches size 47", trained ambulation with crutches NWB Rt LL, the patient managed to walk on the therapy corridor.			2017-02-03	percutaneous aTL done and POP	21/3/2017- off POP today 6/52 post triple arthrodesis. The wound healed. The position is good. Plan: remove stiches today. Reapply a below knee POP walking cast for 4/52. review after 4/52 for cast removal. 27/4/2017- pop cast removed doing fine foot at plantegrade. plan: avail AFO. review with aFO. 10/8/2017 she is doing well, the foot is plantegrade. has been wearing the AFO for 3/12 now plan c…	21/3/2017- rx: availed a POP rubber tyre. Trained PWB gait with crutches.
422	2017-01-11	2017-02-01	2011-10-30	5.25278	7	M	buende	17							PIP Lt foot (equinus deformity)								11/1/2017- equinus	11/1/2017- h/o deformity of the lt foot, with difficulty walking. No clear history about iM injection. o/e: equinus deformity of the foot. Apparently, no activity in TA and extensors. Rx: for atl and pop.	percutaneous ATL		left	ankle	elevate limb, monitor vital 2 hyrl, analgesics, antibiotics, monitor peripheral circulation. Cast for 4 weeks.		2/3/2017- post ATL doing fine, cast removed, foot good dorsiflexion. Plan: avail AFO, review with afo. Afo bracing night and day. Review in 3 months clinical assessment 9/5/2017.	AFO
423	2017-01-16	2017-02-10	2007-01-01	10.1083	12	M	Mityana	24							PIP with equinus deformity rt leg	2010-01-01	3	7.04167	had gluteal injection at age 3, developed pIP and was not appropriately treated	gluteal injection			rt foot in equinous and cavus.	16/1/2017- Walks on the foot tips, deformity no redressable, due to shortened AT and plantar fascia, muscle hypotrophy but normal sensibility in rt leg. Plan: try plantar fasciotomy and AT lengthening.	percutaneous ATL + POP		right	ankle	elevate the limb, monitor peripheral circulation, monitor vitals 2 hrs and record. Caps cloxacillin 250 mgs qid x5/7, tabs ibuprofen 200 mgs tds x 3/7, remanipulation next week Friday.				13/2/2017- 4 days post operative done. The patient reports that he is doing well. Plan: to avail a POP tyre and train ambulation with crutches. RX: availed and fitted POP tyre. Trained ambulation in parallel bars and with crutches PWB RT LL.			2017-02-17	manipulation and casting done	23/3/2017- patient had ATL done 1/12 ago. Equinous has been corrected. Plan: avail AFOs . Review with AFOs. 20/6/2017- no new complaints foot able to bear weight with foot at plantigrade. AFO still in good condition. Plan: review in 3 months clinical asessment. continue with AFO. 19/9/2017- he still has a drop foot of the right foot, he has a lower power of about 2/5 of the TPT, he is still using…
424	2017-01-10	2017-02-10	2003-01-01	14.1083	16	M	Wakiso	33							PIP Rt foot	2012-01-01	9	5.025	reported progressively developed weakness and thinning of the lef and inversion of the foot.	gluteal muscle injection			right leg cavus inversion and equinus right foot	January 2017- deformed right foot x 5 years. Reportedly preceded by injection into the right gluteal muscle progressively developed weakness and thinning of the leg and inversion of the foot. Walks with discomfort on the foot. oe: smaller rt leg cavus inversion and equinus rt foot weak tibialis muscle power. plan: book for triple arthrodesis rt foot. meanwhile serial casting to soften the soft ti…	achilles tendon lengthening		right	foot	may discharge home tomorrow. Review in 6 weeks for cast removal and mold and fit AFO.		11/2/2017- doing fine. toes pink. cast well tolerated. plan: avail crutches. ambulate. elevate limb. ci Rx. 12/2/1017- no new complaint, toes pink. pt ambulating well. plan: ci Rx. ambulation exercies. 13/2/2017- pop tolerated. toes perfusing well. plan: 1) d/c. 2) r/v in 5/52. 14/3/2017- right Pip post plantar fasciotomy cast removed, foot at plantegrade, ambulating on clutches. Plan: avail AFO.…	AFO	10/1/2017- ambulation done with crutches. Gait education done and precautions explained.		4/12/17- back for review. still using aFO. o/e the right foot has hind foot varus. plan: book for triple arthrodesis.	2018-02-09	wound inspection, remanipulation and casting	23/3/2018- done triple arthrodesis 2/2/18, wound healed, plan: remove stitches. Get aFO for day and night splinting. 7/6/2018: the foot is in plantegrade position, he walks with a slight limp due to pain. Plan: continue with night time aFO. Review him in 4 months. 6/9/2018- no major complaints. he is doing well. plan: discard aFO. review after 1 year for clinical control	5/2/2018- provided used crutches, trained ambulation NWB rt lower
425	2017-01-02	2017-02-13	2002-06-05	14.6889	17	F	nakawa	39							PIP Rt foot	2013-01-01	10.5722	4.00278		quinine			equino-varo-supinatus Right foot.	2/1/2017- results of amputation of the hallux. No active movements. Rx: book the boy for triple arthrodesis.	triple arthrodesis		right	foot	elevate the limb, monitor the toes for circulation. Treat as per drug chart. For wound inspection and final cast after 1/52.		11/4/2017- off the cast today, foot in plantegrade position with the toes in flexion. Plan: lets measure an. Review him with the AFO. 25/1/2018- he has started using the AFO. Conitnue AFO use daily. Review him in 3 months.	AFO	14/2/2017- one day post op. he reports that he is doing well. RX: trained ambulation in parallel bars and with crutches NWB RT LL. Availed a pair of crutches.
426	2017-01-24	2017-02-22	2011-10-22	5.33333	7	M	Tororo	21							Lt equinus in PIP	2013-01-01	1.19167	4.06389					severe equinus left side		percutaneous ATL + POP		left	ankle	elevate limb, monitor toe circulation, keep cast for 4 weeks		24/3/2017- 4 weeks post lt ATL. Skin intact perc wounds healed. Plan: negative cast for AFO, reapply cast till orthotic fitted. 4/10/2017- the AFO straps are spoiled. He reportedly cannot walk without the AFO due to pain of the foot. The planter surface appears to have hyperesthesia. Plan: let's repair the AFO. continue with the AFO for daytime use. Analgesics and neuroleptics. review after 1/12 …	AFO	23/2/2017- post aTL 1/7 ago. BK POP left leg. Normla ROM (l) knee and hip. Normal LL muscle power. Able to stand and walk with suppot. RX: standing and walking exercises with frame and crutches (37"). Plan: CT exercises on ward. Review in the afternoon.
427	2017-02-23	2017-03-01	2012-10-29	4.33889	6	M	isingiro	15	102						PIP right foot								23/2/2017- equinus foot	23/2/2017- result of PIP now has an equinus foot and an ulcer on the dorsum of the foot. Has weak TP/TA tendons and peroneals, foot in equinus. Plan for right foot ATL.	percutaneous ATL + POP		right	ankle	elevate limb, monitor vitals 2hourly. Monitor peripheral circulation. Analgesics. Antibiotics.		5/4/2017- off POP castd today. The foot is well positioned. Plan: provide an aFO with a hinge for full time bracing. review after 1/12 for control. 3/5/2017- doing well on aFO. Plan: continue with afo. Review after 3/12 for control.	AFO	2/3/2017- post atl 1/7 ago. Has b/k cast. Able to stand and walk when supported. Rx: issued crutches and Pop tyres. Walking exercises NWB, walking well. Plan: can be discrhaged. Ct with POP x 4/52
428	2016-11-30	2017-03-07	2001-08-05	15.5889	17	F	Mityana								Rt PIP	2004-01-01	2.40556	12.9139	gradual weakness and deformity of the right foot. Treated at manutamba rehab centre, but stopped along the way.	IM injection			30/11/2016- pes varus supinatus rt side. Plan: will need a triple arthrodesis. Let's start with serial manipulation and casting. 6/12/16, 13/12/16, 20/12/16- manipulation and casting done. 3/1/2017- off POP today following serial manipulation and casting. there is some improvement but still rigid adductus. plan: book for triple arthrodesis rt foot.		triple arthrodesis		right	foot	monitor till stable. Analgesia as per drug chart. Cast for 8 weeks.		20/4/2017- she is off the cast today, foot is an acceptable position. Plan: stitch removal today. Avail an AFO. Review with the AFO.	AFO	30/11/2016- child with BK POP cast right leg. Able to stand and walk with support. Rx: walking exercises with crtuches (49")			2017-03-15	manipulation and casting done
429	2017-01-25	2017-03-17	2009-02-24	8.06389	10	M	kaberamaido	32							Rt PIP	2009-05-01	0.186111	7.73333		IM quinine injection			27/1/2017- equinocavovarus rt foot deformity	27/1/2017- father give history of im qnn at 3 mo of age. Now with deformity in rt foot since childhood. Has limping gait with equinocavovarus foot deformity rt foot. Plan: manipulation and casting for 3 weeks then schedule aSTL and triple arthrodesis, then splint with AFO. 30/1/2017, 14/2/2017, 28/2/2017- manipulation and casting done.	percutaneous ATL + POP		right	ankle	elevate limb. Monitor peripheral circulation. Analgesics. Antibiotics. Cast for 4 weeks.		18/4/2017- patient had right ASTL done. Cast is off. Plan: avail afos. r/v with AFOs.	AFO	14/2/2017- seen patient. Post rt foot manipulation and casting with a below knee Pop cast. Rx: availed a pair of crutches. Trained ambulation in parallel bars and with crutches NWB rt ll. 20/3/2017- patient seen, he is ambulant with crutches and bk pop lt lower limb, provided a pop tyre.
430	2017-02-23	2017-03-27	2001-09-22	15.5139	17	F	Amuria	38							Rt PIP	2002-01-01	0.275	15.1444		QNN injection			equinous deformity of the right ankle		percutaneous ATL + POP		right	ankle	elevate limb, monitor peripheral circulation, analgesics, antibiotics, remanipulation next week Monday		10/4/2017- residual 5* equinus. Manipulation and casting for 4 weeks in maximum dorsiflexion. 9/5/2017- lets measure for an aFO, foot is in good position. Plan: review with AFO. 12/6/2017- cast broken, remove cast and mold and fit AFO.	AFO	28/3/2017- patient seen in ward day one post op, is on below POP rt lower limb, no problem reported and wants to walk. RX: trained ambulation pwb rt lower limb using a walker, patient very stable, provided crutches and trained how to walk with crutches and he is very stable.
431	2017-01-24	2017-03-29	2012-09-26	4.50833	6	M	kaberamaido	14							Lt foot PIP							immunization	27/1/2017- equino cavus	27/1/2017- weakness and deformity in lt foot following immunization in early childhood. Now with lt foot deformity. p/r lt foot equino cavus. Plan: weekly maipulations for 2 weeks then schedule fractional ATL. 30/1/2017- manipulation and casting done. TCA next week. 14/2/2017- remanipulation done. TCA in 2/52. 28/2/2017- manipulation and casting done. TCA next week. 7/3/2017- manipulation and cas…	percutaneous achilles tendon lengthening		left	ankle	elevate limb, monitor peripheral circulation, analgesics, antibiotics
432	2017-02-20	2017-03-29	2005-12-27	11.2556	13	M	kaberamaido	36	147.1						Pes equinovarus supinatus Lt in					gluteal IM injection			21/2/2017- lt pes equinovarus supinatus	21/2/2017- plan: book for a percutaneous ATL. 28/2/2017- manipulation and casting done. Tca next week. 7/3/2017- remanipulation done. Plan: fot ATL in 2/52.	percutaneous ATL + POP		right	ankle	elevate the limb. Monitor peripheral circulation. Analgesics. Antibiotics.				21/2/2017- noted child post M+C. ambulation with walker done, then crutches. Availed crutches and precautions explained.
433	2017-03-06	2017-04-03	2011-02-02	6.16944	8	M	Tororo	17							Rt PIP					quinine injection			pes equinovarus supinatus		percutaneous ATL + POP		right	ankle	keep cast for 4 weeks, monitor toe circulation		9/5/2017- off POP today 1/12 post ATL. Plan : avail an aFO rt side. Review after 4/52. 8/6/2017- has gotten the AFO today, adised on AFO use, plan: review in 4 months. 4/4/2018- walks well with the AFO. Still has a foot drop. Tibialis posterior tendon power is 4/5. tibialis anterior and peroneii muscles are power zero. plan: schedule for tibialis posterior tendon transfer rt foot	AFO	4/4/2017- provided a pop tyer rt, noted crutcheshigh for patient, changed to 33" and reported to the therapist who gave the first pair. Trained ambulation with crutches PWB rt LL, patient not yet stable with crutches. Advised patient to practice walking with crutches more often.			2018-05-11	TP tendon transfer done	26/6/2018- off POP today post tendon transfer. Plan: remove stiches. Avail an AFO for full time bracing. Review after 6/52 for clinical control. 8/11/2018- foot is plantegrade. There is a fixed flexion of the hallux, the aFO is being repaired but he uses it daily. plan: to continue using the AFO, review in 3 months. 13/2/2019- has a slight foot drop and forefoot adductus. plan: continue AFO for n…	14/5/2018- issued a pair of crutches and trained ambulation with a walker then crutches (NWB)
434	2016-09-26	2017-04-04	2004-11-07	12.4083	14	m	NGORA	42							Lt side PIP	2009-01-01	4.15	7.73611	gradual progression	injection neuritis			severe equino varus and cavus	26/9/2016 TA tendon active. Bearing weight on lateral border of foot and equinus. 19/1/2017- patient undergoing manipulation and casting, reportedly has a pus discharing ulceration at the dorsum of the foot left foot. Plan: dress wound and apply window. re apply POP cast. caps cloxacillin 250 mgs qid x 1/52. daily wound dressing. review next week 27/1/17 for re manipulation. 23/2/2017, 2/3/2017- …	achilles tendon lengthening		left	heel	monitor till stalbe, analgesia as per drug chart, remanipulation in 2 weeks in OPD Tuesday 18/4/2017				12/1/2017- trained ambulation using a walker and parallel bars was able to walk with crutches from therapy department to ward. Patient is sdtable. Provided with a pair of crutches. 5/4/2017- one day post ATL with POP cast. The patient reports that he feels a bit weak. plan: gait training. Rx: trained ambulation with a walker, patient was able to walk on ward and back to his bed.			2017-04-11	manipulation and casting	18/5/2017: patient had aTL done for a left pIP. i.e. the equinous is correced but still has a forefoot adductus. Plan: lets attempt using aFOs for 3/12. if no further correction then plan for a triple arthrodesis. 16/11/17- the foot still has equinovarus deformity. plan: boook for triple arthrodesis.
435	2015-06-11	2017-04-05	2011-10-12	5.48056	7	M	Kampala	19							PIP Rt								pes varus supinatus rt side. No equinus.	11/6/2015-tibialis posterior appears active and strong. Currently suing an Afo that does not correct the adductus. Plan: provides an AFO for full time bracing. Review after 4/52. 14/1/2016- child has been walking without the brace and is developing bruises on the lateral aspect of the foot. o/e no power in the tibialis muscles. foot drop with inversion. plan: AFO full time bracing.	external fixator adjustment. Pneumatic tourniquet to right thigh. Multiple medial and lateral incisions over foot and distal rt leg, made standard Barr anterior transfer of tibialis posterior tendon, anchorning it into cuboid. Released tourniquet and achieved hemostasis with electrocautery. closed skin with nylon 3/0 stitches dressed wounds vaseline and iodine gauze. applied BK cast with heel in …		left	tibia	monitor till stable. Monitor toe circulation 2 hourly for 6 hours. Split cast if in doubt. Analgesia as per drug chart. Crutches for NWB for 6 weeks. Cast for 6 weeks.		19/5/2016- deformity is getting wrose. Patient is not compliant. Plan: continue AFO. Review 3 months. 19/5/2017- post tendon transfer. Cast off, mother notes an immediate improvement in the foot position. Stitches out today. Get Afo measure. 17/10/2017- doing well with teh AFo. still has some residual foto drop. plan: continue AFO for daytime use only. PT for the rt foot. review after 3/12 for co…	AFO	6/4/2017-one dat post operative. He reports that he is doing well. O: child with below knee POP cast plan: to avail crutches and gain train. 17/10/2017- has dorsiflexion of the foot power +2. has some limitation of ankle ROM. Gait education done. Did muscle stimualtion for strengthening. activity education squat walking, continue therpay from Ntinda. 2/2/2018- he is able to walk. noted that the c…
436	2017-02-14	2017-04-26	2010-05-05	6.975	9	M	luwero	22							Rt equinus in PIP	2015-01-01	4.65556	2.11944		gluteal iM injection			severe equinus rt foot. Book: percutaneous aTL		percutaneous achilles tendon lengthening		right	ankle	elevate limb, analgesics, antibitoics, cast for 4 weeks		25/5/2017- POP off today. The foot is plantigrade, smaller than the contralateral, with cavus deformity. It is quite flexible, going easily beyond neutral. Some activity (grade 3) in TA and extensor of the hallux. Rx: full weight bearing is allowed. manipulations of the foot in dorsidlexion. clinical control in 3/12. 18/8/2017- has plantegrade. he has a claw toe deformity. plan: get an AFO for ni…	AFO	27/4/2017- seen patient from general ward. He reports that he is doing well. Patient one day post op. patient with below knee POP cast. Plan: to health educate parents abt child's condition. To avail POP tyre, crutches and train ambulation with crutches NWB rt LL.
437	2017-03-29	2017-04-28	2003-01-03	14.3194	16	M	wakiso	35							Equinus Rt in PIP								equinus right foot in PIP. Has been undergoing serial manipulation from katalemwa. Plan: book for percutaneous ATL.	9/3/2017- equinus rt foot in pip. Has been undergoing serial manipulation from katemwa. Plan: book for percutaneous achilles tendon lengthening.	percutaneous achilles tendon lengthening		right	ankle	elevate limb, monitor peripheral circulation, analgesics, antibiotics, remanipulation next week Friday.	1/6/2017- he is off the cast today, the foot is in slight equinus. Plan: measure an aFO, review him with the Afo. 26/7/2017- he is unable to dorsiflex beyond 90 degrees. The foot is in neutrla position. Plan: continue with the AFO. Review after 6/12 for control. 7/2/2018- still has a foot drop but has no AFO. no equinus but a mild flexible adductus. plan: avail an AFO for daytime use. review afte…	8/12/18- doing well, first day post triple arthrodesis right foot. Cast is extremely soiled with blood, feet are warm, not swollen, pink and blanching. Plan: keep foot elevated. Reinforce cast on Monday. Analgesia. 10/12/2018- today reports pain at surgical site well controlled. toe capillary refill less than 2 seconds. motor/ sensory fxn intact. no other major concerns. plan: avail crutches NWB.…				29/8/2018- still using the AFO but some straps are gone. No equinus but has heel varus and adductus. Plan schedule for triple arthrodesis Rt foot in december.	2018-12-07	triple arthrodesis done for PPP		10/12/2018- seen patient post op, on below knee pop. Rx: issued crutches, trained ambulation NWB rt lower limb, stable knows how to walk with crutches.			2018-12-14	manipulation and casting done	1/2/2019- off POP today 8/52 post triple arhtrodesis Rt foot. The wound healed. Plan: remove stitches. Review after 1/12 for clinical control. 1/3/2019: has on and off swelling of the rt foot. Plan: issue with AFO, night splinting. 17/5/2019- doing well. plan: continue nightsplinting.
438	2017-04-11	2017-05-03	2010-02-02	7.25278	9	M	Ntungamo	17	114						Lt PIP					glutal injection			equiovarus lt foot		percutaneous ATL + POP		left	ankle	monitor toe circulation				11/4/2017- issued a pair of crutches and trained ambulation in parallel bars + crutches (nwb)			2017-05-10	manipulation and casting	19/6/2017- plantargrade feet fitted with AFO. Preferably fit shoes and activity as tolerated. Review in 2 months. 19/9/2017- still has a foot drop. Doing well on aFO but it needs repair. Plan: to the workshop for repair of the AFO. Continue with the AFO for daytime use. review after 6/12 for clinical control. 20/3/2018- he still has a drop foot, the splint is broken, he is doing much better, plan…
439	2017-01-10	2017-05-10	2005-03-18	12.1444	14	M	Soroti	25							Lt PIP	2015-01-01	9.78611	2.025		gluteal IM injection of quinine		malaria treatment	paralysis of the left leg and foot with a varus adductus deformity of the foot and foot drop.	tibialis posterior power 5/5, the other muscle groups power 0/5. plan: book for tibialis posterior tendon transfer.	percutaneous ATL + POP		left	ankle	elevate the limb, monitor peripheral circulation, analgesics, antibiotics		6/62017- off the cast today, post ATL. Forefoot adductus, plan: lets measure an AFO, review with the AFO.	AFO	11/5/2017- seen patient. S: he reports that he is doing well. One day post operative. O: found patient sitting in bed. Plan: gait training NWB and to avail crutches.
440	2017-03-20	2017-05-12	2010-02-01	7.28056	9	M	Mityana	24	128.3						Rt PIP								30/3/2017- equinus. Reports h/o normal delivery- normal gait with growth and development then history of injection trauma. Visited nearby health centre where tenotomy was done but later after cast removal developed equinus deformity regression.	o/e: FGC- alert. K, A, D- nill. L/E rt foot equinus deformity bearing weight at forefoot planter surface with painful ankle joint on prolonged movements. TA tendon active muscle power +3. plan: book for aTL rt foot.	percutaneous ATL + POP		right	ankle	elevate limb monitor peripheral circulation, analgesics, antibiotics, monitor vitals		12/7/2017- patient doing well with aFO. The AFO is arleady wornout. Plan: fulltime bracing x 6/12 to workshop to fix AFO. 17/1/2018- 7 yr/m been on mgt for pip right foot, currently no major complaints, ambulating well plan. Review in 1 year- 17/1/19.	AFO	15/5/2017- seen pt trained ambulation nwb with crutches. Availed crutches.
441	2016-09-14	2017-05-15	2001-11-05	15.5278	17	f	Kabale	54	157						Rt PIP								14/9/2016- PIP with a foot drop right side. Has been undergoing serial manipulation and casting and then now using an AFO with a hunge. Has moderate heel varus and adductus but flexible. No equinus.	perioneii and tibialis anterior are power zero while tibialis posteiror is power 4. plan: continue with the AFO. Review after 6/12 for control. 22/3/2017- doing well, no equinus, but has a heel barus and adductus which are flexible. Tibialis anterior and posterior power 4. plan: book for tibialis anterior tendon transfer.	TA tendon transfer. Transferred the insertion of the tibialis anterior tendon laterally to the lateral cuneiform bone. Cleaned and closed. Dressed and deflated the tourniquet. Applied a below knee POP cast.		right	foot	elevate limg, treat as per drug chart, monitor the toes for circulation and swelling. Maintain POP cast for 6/52.		28/6/2017- off POP today 6/52 post tendon transfer. The wounds healed. Plan: stitches off today. Avail an AFO for full time bracing. Avail an aFO for full time bracing. Review after 1/12 for clinical control. 1/11/2017- she is not wearing an aFO (refuses to wear it). still has a foot drop and heel varus plus some adductus. plan: encourage her to wear the AFO for daytime use. review after 6/12 for…	AFO	16/5/2017- seen patient from general ward. One day post op. care taker says that the child is supported by katalemwa. Plan: gait training with walker and crutches. Rx: trained ambulation with a walker and later progressed to using crutches NWB Rt LL.
442	2017-05-04	2017-06-02	2004-05-10	13.0611	15	M	Lira	19							PIP Lt foot (equino-cavus)	2010-01-01	5.64167	7.34167					equino-cavus deformity. The foot is much smaller.	no activity in TA- TP. Moderate LLD. Rs: 1st phase, aTL +/- plantar fasciotomy. 2nd phase: re-evaluation for correction of cavus deformity.	plantar fasciotomy. Performed plantar fasciotomy and ATL left foot. Applied cast with foot still plantar flexed.		left	foot	monitor toe circulation, remanipulation next week				4/5/2017- has POP cast. Rx: walking exercises. Walking well. NWB gait.			2017-06-12	manipulation and casting done	27/7/2019- POP off today. The foot is plantigrade, painless. Able to walk on it. There is good activty in the peroneal tendons and moderate activity in TA. No activity in TP. No cavus. Rx: full weight bearing, manipulations for foot dorsiflexion. observation for 6/12.	12/6/2017- seen pt from ward, mother is away but he consented to therapy. Rx: issued a walking tyre for protection. Trained ambulation with crutches (NWB).
443	2017-05-04	2017-06-02	2008-08-13	8.80278	10	F	Lira	28							PIP Rt foot	2012-01-01	3.38333	5.34167					4/5/2017-foot in varus hindfoot. Cavus deformity.	4/5/2017- strong activity in TA and TP today.	TA tendon transfer. Standard approcahes calcaneal osteotomy, and pinning done. Transferred tibialis anterior laterally to the cuboid transosseous. Happy with foot position.		right	foot	drugs as per chart, elevate foot on pillows, split cast PRN		27/7/2017- POP off yesterday. All the surgical scars are fine, the foot looks in good position. There is actiity in the transferred tendon. RX: stitches and K wires removal. Physiotherapy for dorsiflexion. Brace to protect the foot for 30/7. clinical control in 2/12. 21/9/2017- she walks quite well, moderate foot drop. no pain reported. able to squat. no brace was given to support the foot. there…	BRACE	4/5/2017- has POP cast (R leg). Rx: walking exercises. NWB gait. Walking well. 5/6/2017- seen patient psot op, knows how to walk with crtuches, reports crutches broken. Rx: provided a new pair of crutches, NWB rt lower limb emphasized and trained
444	2017-05-18	2017-06-05	2012-01-01	5.42778	7	M	Kayunga								Left PIP					IM injection		malaria treatment	18/5/2017- has been undergoing M+C from kabembe hospital. Equinous	18/5/2017- the fore foot adductus has corrected but still has an equinous. Plan: book for ATL.	percutaneous ATL + POP		left	ankle	elevate the limb, analgesics, antibiotics, monitor peripheral circulation, cast for 4 weeks then AFO		4/7/2017- off the cast today. Plan: avail an AFO. Review with AFO.	aFO	6/6/2017- seen patient in ward day one post op, on bk POP lt lower limb. Rx: trained ambulation using a walker, patient very stable to get crutches from acheru
445	2017-04-27	2017-06-26	2002-02-04	15.3944	17	M	Mukono	49							PIP right foot								equinovarus, has been undergoing serial casting and developed blisters. Plan: book for triple arthrodesis.		triple arthrodesis		right	foot	elevate the limb, monitor the toes for swelling and circulation. Tret as per drug chart. For wound inspection and final cast on Monday 3/7/17.							2017-07-03	manipulation and casting	10/8/2017- foot is in plantegrade position, stitches in situ. Plan: lets measure an AFO. Review with the AFO
446	2017-06-05	2017-07-21	2007-06-05	10.1278	12	M	Sembabule	22							Left PIP	2012-01-01	4.57222	5.42778	sustained an injection trauma about 5 years ago and has had a gradual increasing deformity of the left foot				6/6/2017: gradual increasing deformity of the left foot with a cavovarus and equinus of the right foot. Plan: for serial casting then aTL as a second stage.	06/06/2017- walks with a deformity of the limb. Manipulation and casting on 20/6/17, 27/6/2017, 4/7/2017. 11/7/2017: the foot is in plantegrade on manipulation.	percutaneous ATL + POP		left	ankle	treat as per chart, elevate the foot on a pillow, monitor circulatory status of the foot, cast for 4/52		25/8/2017- 4 weeks post perc ATL. To worshop for negative cast for AFO reapply cast till orthotic provided. Use orthotic day and night for 6 months. r/v after 6 months. 5/12/2017- has some improvement. Plan: use AFOs full time. Review in 3/12. repair of the AFO at ortho workshop. 2/3/2018- remains with a cavovarus deformity. TA power 0, TP power 5, plan: schedule lt foot triple arthrodesis. 10/5/…	aFO			3/2/2018- weight 24 kg. remains with a cavovarus deformity. TA power 0, TP power 5. plan: schedule lt foot triple arthrodesis.	2018-04-30	calcaneal osteotomy performed		2/5/2018- patient is ambulant on crutches, crutches were left at home therefore no crutches issued.			2018-05-09	manipulation and casting	19/6/2018- post calcaneal osteotomy and now has had cast removed after six weeks. No new concerns. Foot is plantigrade now but still has some residual adductus. Plan: already has aFO for day and night AFO use. Review in 1/12. 19/7/2018- still has residual forefoot adduction and hindfoot varus. plan: repair AFO in workshop. aFO full time for 2/12.
447	2017-05-02	2017-07-27	2005-01-13	12.5389	14	m	Buikwe	34							PIP right foot	2010-01-01	4.96667	7.33611							TP tendon transfer. One anteromedial and one posterolateral incision over malleoli, performed split tibialis posterior transfer as described by kling and kaufer. Released turniquet and achieved hemostasis. Closed kin with nylon 2/0 stitches. Applied AK cat with foot in neutral and knee in slight flexion. normal digit perfusion post procedure.		right	foot	monitor vitals till stable, monitor to capillary refill 2 hours for 6 hours, split cast if inadequate. Analgesia as per drug chart. AK cast for 4 eeks, then BK for two weeks, then AFO.		31/8/2017- had split rt tibialis posterior tendon transfer 5/52 ago. o/e: the wound has healed, there is still a residual forefoot adductus. Plan: stitch removal. Apply BK cast for 3/52 review in 3 weeks. 21/9/2017- off the cast today, the foot is in neutral position. plan: avail an AFO, review him with the AFO. 7/12/2017- 7 year hx of an injection trauma with weakness in the right foot, he is cu…	aFO	28/7/2017: rx: issued a pair of crutches, ambulation training NWB rt lower limb done, patient is very stable ambulating with crutches. 28/7/2017: seen patient in ward day one post op, he is on a long leg cast rt leg. Rx: trained ambulation NWB rt lower limb using a walker and crtuches, patient is very stable with both walked out of ward and back awaits money for crutches
448	2017-06-26	2017-08-14	2012-05-05	5.275	7	M	kiruhura	23						father reports that the deformity has become more severe and the child walks on the lateral aspect of the right foot	Right PIP					IM injection		febrile illness	27/6/2017-right fore foot adductus, and supination. 11/7/2017- manipulation and casting done. 18/7/2017- TCA done. 18/7/2017- 4th manipulation and casting done. 25/7/2017- Manipulation and casting		percutaneous achilles tendon lengthening	manipulation and casting	right	foot	elevate the limb, monitor for circulation of the toes and swelling. Treat as per drug chart, discharge on POP for 4/52		18/9/2017- he had percutaneous rt ATL a month ago. The cast has been removed and the foot is plantigrade. Plan: avail AFO, day and night bracing. Review in 3/12. 11/1/2018- the foot is plantigrade. Start only night time bracing with AFO. Review in 3/12/ 12/4/2018- he presents with a history of PIP of the right foot, he underwent an ATL and is using an AFO day and night time. using a brace and foo…	aFO	ambulation training nwb with crutches, patient is stable with crutches. Issued and fitted a walking tyre.
449	2017-05-05	2017-08-18	2003-02-14	14.5111	16	F	Mbale	37							Rt PIP	2010-01-01	6.88056	7.34444				febrile attack		injectionneuritis, later on associated with svarus foot deformity with lower limb weakness. TA and TP tendon active. Good ankle joint ROM. Bears weight on lateral border of foot.	manipulation and casting		right	foot	discharge home for serial manipulation and casting meanwhile				6/2/201- plan: active ankle mobs, strengthening exs. Rx: ankle active exercises x 10. stretching ankle jt in eversion and inversion, swuatting, standing on one leg for 10 secs, home program. 18/8/201- seen patient, came in ambulating with cruthces which are short. rx: issued a pair of crutches, she is stable with crutches.			2017-08-25	remanipulation	14/9/2017- good power in the TP tendons 4/5. 03/11/2017 post split TA tendon transfer has retained TA activity. 2/2/2018- doing well. Dorsiflexion improved. But has some heel varus. Has developed lateral malleular bursa.
450	2017-08-01	2017-08-21	2007-01-17	10.5944	12	M	Mubende	30	144.5						PIP left foot								cavovarus; plantegrade position. Equinovarus foot. Born with a clubfoot of the left foot which was managed well, later sustained a post injection trauma on the same foot and has been having a cavocarus foot managed in 4 casts, the foot is almost in plantegrade position but is improving steadily.	equinovarus foot power is 1 in all the TA and TP muscles	triple arthrodesis		left	foot	for remanipulation and wound inspection next week Wednesday				22/8/2017: child comes from namatamba. Did standing exercises, walking exercises with standing frame as child has 1 crutch. Has another crutch in Namutamba. Continue walking Exercises.			2017-08-30	manipulation and casting	17/1/2018- 11/m came in for review, had triple arthrodesis 5/12, reports has had AFO for about 1.5 months. o/e foot still in equinus with intoeing. Plan: continue AFO full time bracing for 6/12, review in 6/12.
451	2017-07-18	2017-08-25	2013-02-06	4.55278	6	M	Kayunga	18							PIP right foot	2016-01-01	2.90278	1.54722					1/8/2017- remanipulation done. TCA in 2/52		percutaneous ATL + POP		right	foot	cast for 4/52. treat as per chart, elevate the foot		25/9/2017- foot plantargrade. Workshop to mold and fit AFO. 16/10/2017- the foot is plantigrade. Review in 3 months. 23/4/2018- the foot is plantigrade. He misssed his ast appointment because the mother was looking afer his grandfather. Plan: continue AFO at night only. workshop to review the AFO. review in 2/21.	aFO	seen patient on back POP rt foot. RX: trained ambulation using parallel bars and crutches NWB rt lower limb, patient not very stable with cruthces provided cruthces, care taker to keep training him til he gets very stable
452	2017-04-16	2017-08-25	2002-03-13	15.45	17	M	Congo/ DRC								PIP Lt foot								LT Pes equinovarus supinatus results of PIP		percutaneous ATL + POP	cast	left	foot	tret as per chart, elevate the foot on a pillow				28/8/201- after noon session: reviewed patinet, measured crutches 47', trained ambulation NWB with the crutches paitnet is stable with them, availed crutches. Seen patient from the ward, he is doing well, trained ambulation NWB with a walker to discuss with the caretaker the crutches they want.			2017-08-30	manipulation and casting	3/10/2017- he is off cast today, the foot is in neutral position. Plan: let's avail an AFO, review him with the AFO. 13/12/2017- has some improvement was nly using day only. Plan: continue use of AFOs, repair the AFOs, review in 3/12. 19/3/2018- mild equinus, LLD 2CM, plan AFO with raise. review PRN.
453	2017-08-02	2017-09-08	2002-08-08	15.0833	16	M	Wakiso								PIP Lt lower limb								lft foot equinus, Has been undergoing manipulation and casting from katalemwa		percutaneous achilles tendon lengthening		left	foot	elevate the limb, monitor the toes for circulation and swelling. Treat as per drug chart. For remanipulation.		15/9/2017- received manipulation and casting. 23/10/2017- still has equinus, and knee flexion contracture- two options, serial manipulation for midfoot osteotomy in holidays. 4/12/2017- still has equinovara deformity.
454	2017-07-06	2017-10-02	2011-06-05	6.325	8	F	Hoima	16							PIP Rt foot	2014-01-01	2.57222	3.51389		right leg IM injection			equinovarus rt foot,	has high stepping gait	percutaneous achilles tendon lengthening		right	foot	elevate the limb, monitor the toes for circulation and swelling, treat as per drug chart, discharge home when comfortable on POP for 4/52	8/12/2017-small ulcer posterior lower leg. AFO repair prn. 25/3/2019- the AFO hasn't been repaired.	8/12/2017- retains a dynamic cavovarus foot deformity		3/10/201- seen patient fomr the ward, found her lying in bed measured for crutches 35". Plan: train ambulation when they get the crutches. 3/10/201- issued a pair of crutches (35") plan: physiotherapist on ward to train ambulation.
455	2017-09-18	2017-10-13	2003-06-06	14.3528	16	F	Masaka	36							PIP Lt foot								relapse of the deformity due to non compliance with AFO		percutaneous achilles tendon lengthening	AFO, crutches, PT	left	foot	monitor circulation, elevate limb	mild pain lt foot- 15/11/2017.	26/3/2018- able to dorsiflex and plantar flex foot easily. 23/8/2018- good left ankle dorsiflexion, but static claw hallux plan.		16/10/201- seen patient on below knee pop lt lower limb. Rx: provided crutches, trained ambulation nwb lt lower limb using crutches, patient stable, walked back to ward with crutches
456	2017-08-25	2017-10-20	2006-07-05	11.2917	12	M	Wakiso	35							PIP Lt foot with cavovarus deformity					IM injectio to left buttock			left cavovarus foot deformity; weakness in lt foot since childhood injection	can play football and run, swing out gait	triple arthrodesis	casting, crutches	left	foot	drugs as per chart, elevate limb on pillows, split cast if tight or circulation compromised, call surgeon if concern of any sort		7/9/2017- manipulation and casting done. Wound is clean and dry. 18/1/2018 Still has residual cavovarus. 15/2/2018- Foot is plantigrade and has no pain.		23/10/201- issued and fitted a pop tyre, noted worn out crutch pods. Plan: issued a new pair of crutch pods
457	2017-10-05	2017-11-27	2001-01-16	16.8639	18	M	Mitooma	60	162.2						PIP left leg	2007-01-01	5.95833	10.7611					injection neuritis	5/10/2017- sustained an injection neuritis to the left leg about 10 years ago, the left foot is stiff, the limb is shorter than the normal side. Plan: book for a triple arthrodesis/ ATL class 3.	percutaneous achilles tendon lengthening	cast	left	foot	elevate the limb, treat as per drug chart, for remanipulation after 1/52		28/11/2017- had percutaneous ATL done. Plan: transfer to hostel. 1) consider d/c. 2) crutches. 3) r/v in 1/52 for remanipulation, admit on 3/12/2017 for theatre on 4/12/17. 4/12/2017- manipulation and casting under sedation. Left foot. No plantegrade position achieved. plan: cast for 2/52. there mid-tarsal osteotomy has to be done. with correction of the 3rd toe. 3/12/2017- plan: 1) r/v 2/52 cast…		22/5/201-walking exercises, has AFO, foot swollen, pain when he tries to full weight bear. Rx: ambulation using one crutch on rt hand side trained, to win off crutches when pain reduces advised to wear AFO with stocking. 28/11/201- seen patient with pop lt foot below knee. Rx: issues crutches, trained ambulation NWB lt lower limb, stalbe walked- 30 meters			4/12/2017	Had manipulation and casting
458	2017-09-05	2017-11-29	2002-01-02	15.9083	17	M	Mityana	30							PIP	2012-01-01	9.99722	5.67778							triple arthrodesis, oblique incision over lateral midfoot, exposed talonavicular subtalar and calcaneocuboid joints ,denuded joints	serial casting, below knee POP cast	right	foot	monitor vitals till stable, elevate limb on pillow, analgesia as prescribed. Remanipulation in 3 weeks on 13/12/2017		PT reports doing well. Child on crutches.		Rx: trained ambulation with a walker and progressed to crutches NWB Rt LL. Plan: gait training with crutches NWB Rt LL.									6/2/2018.	ATL	18/5/2018- has clinical healing, has passive ankle ROM. Has an and off pain in the midfoot
459	2017-05-11	2017-12-07	2002-09-02	15.2639	16	F	Mbarara	44	155						PIP Rt foot (cavo-supinatus)								supinated-cavus foot. Deformity of the IP joint of the hellaxx-callosity along the lateral border of the foot	11/5/2017- patient with right foot deformity, following one injection. occasional pain reported, able to run. Main concern in gait pattern and foot appearance.O/E: supinated cavo foot. Deformity of the LOP foot of the hallux. Callosity along the lateral border of the foot. x ray: no bone lesions seen. d: PIp right foot (cavo supinatus). for triple arthrodesis: right foot (at the end of the crease…	triple arthrodesis	cast	right	foot	monitor vitals till stable, monitor two perfusion two hourly, rest right leg on pillow, analgesia as per prescrption. Cast for 10 weeks. Plan discharge for Monday next week	received another triple arthrodesis on 24/8/2018 and manipulation and casting done on 31/8/2018	8/12/2017- had triple arthrodesis done. Now has pain plan: 1) reinforce the cast. 2) give analgesia. 3) d/c on monday. 4) provide crutches. 11/12/2017- 1) allow home. 2) walking tyre. 1/2/2018- re apply cast for 4/52. still residual hind foot varus on 1/2/2018. 1/3/2018- cast off today- sent for AFO. oe: the foot is in slight dorsiflexion and varus of hindfoot. there is activity in TA muscle. Toe…	aFO
460	2017-12-11	2017-12-22	2009-09-05	8.29722	9	M	Iganga								PIP Rt foot					IM injection			equinovarus rt foot; h/p deformity in the rt foot, no clear h/o IM injection	deformity in the rt foot	percutaneous ATL + POP	AFO for full time bracing	right	foot		off POP
461	2013-03-20	2013-03-27	2005-10-18	7.44167	13	F	mukono								post injection paralysis								equinus left foot	21/3/2013- equinus left foot in suspected post injection paralysis. Has been undergoing serial manipulations and casting from ACHERU.	percutaneous achilles tendon lengthening		left	ankle	elevate the limb. Analgesics as per chart. For remanipulation next wenesday 3/4/2013		2/5/2013- off pop today. Foot is well positioned.
462	2013-03-21	2013-03-27	1998-04-07	14.9722	21	M	kasese								post injection paralysis					Im gluteal injection				21/3/2013- result of im gluteal injection sustained a gradual deformity of the rt foot. Has been undergoing serial manipulations and casting at ACHERU.	TP tendon transfer. Right pip. Post 1) achilles lengthening. 2) intrinsic release. 3) calcaneal osteotomy. 4) tibialis posterior tendon transfer. Aseptic technique and under torniquet ischemia .multiple incisions above procedures done foot plantegrade. fixed calcaneous with k wires and vicryl no 0 used to tag the tendon through a bone tunnel in cuboid to button plantarward.		right	foot	elevate. Keep cast for 6 weeks and fit AFO after cast removal.		9/5/2013- 6/52 post TPT transfer and calcaneal osteotomy
463	2013-03-21	2013-03-27	2002-01-01	11.2389	17	M	luwero								post injection paralysis					Im gluteal injection				21/3/2013- reported history of iM gluteal injection followed by deformity of the right foot. Has been undergoing serial manipulations and casting at ACHERU.	percutaneous achilles tendon lengthening		right	foot	elevate the limb, monitor circulation. For final manipulation next Wednesday		3/4/2013- manipulation and casting done. 9/5/2013- patient came off pop today. Has mild equinus.
464	2013-06-27	2013-07-01	1998-01-01	15.5	21	M	buikwe	45							post injection paralysis Rt					gluteal iM injection			equinovarus rt	27/6/2013- pes equinovarus rt result of several gluteal IM injections. Tibialis posterior power 5/5. tibialis anterior and peroneii power 0/5. plan: percutaneous ATL on 1/7/2013.	achilles tendon lengthening		right	foot	elevate right foot. Remanipulation on 8/7/2013		8/5/2014- rigid varus deformity rt foot with pressure callosity lat malleolus lat aspect foot. Plan: for triple arthrodesis in dec holidays. r/v end of nov. 15/1/2015- contineu using aFO, will require triple arthrodesis on 28/1/2015.	aFO				2015-01-28	triple arthrodesis	12/2/2015- for wound inspection and remanipulation in theater. 9/4/2015- doing well, plan remove stitches avail AFO. Review with afo.
465	2013-09-19	2013-11-13	1996-01-01	17.8667	23	F	Kampala	47							post polio paralysis or post injection								19/9/2013-severe equinus right foot	19/9/2013- mom reports Joy born with weakness in both legs, deformity however was progressive in early childhood. Ambulant with elbow crutches. Walks on the dorsum of the right foot and lateral aspect of left foot. She is S4. clinically severe equinus right foot with no motor function ankle and foot. knee and foot function very good. left foot in mild equinovarus, strong tibialis posterior 5/5, t…	triple arthrodesis for PPP		right	foot	elevate foot, drugs as per medicine sheet. Cast change next week on Wednesday. A pair of crutches NWB							2013-12-06	triple arthrodesis	14/1/2014- wound healing fine, moderate swelling. Sensation present over first web space, heal and mid plantar foot, orsal lateral no sensation. Plan short leg cast for 6 weeks. 6/5/2014- cast off today. Wound healed. Foot plantegrade. Plan: 1) to workshop for afo measurement and molding. 2/ R/v with afo fitted. 18/9/ 2014- no major complaints. doing well with the afos. plan: continue with afo. r…
466	2015-12-08	2015-12-18	2010-07-12	5.43333	8	M	kampala								post injection paralysis right foot	2010-12-01	0.386111	5.01944		IM injection			equinus deformity	8/12/2015- deformity right foot following an iM injection at 5 months. Deformity has gradually worsened. o/e equinus deformity with tight achilles tendon right foot. Plan: ATL meanwhile manipulation and casting	percutaneous ATL + POP		right	foot	analg as per chart		20/1/2016- Iff POP today 4/52 post ATL. Good position. Plan- provide aFO. r/v after 4/52 for assessment of the foot.	aFO
467	2016-01-27	2016-02-08	2011-04-27	4.78056	8	F	Kampala	21	122.5					equinus rt foot	post injection paralysis					IM gluteal injection			equinus right foot IM gluteal injection		percutaneous achilles tendon lengthening	AFO for full time bracing	right	foot	PT	no deformities of the foot, however still has a foot drop. No active muscle in the foot except plantar flexors
468	2016-02-25	2016-03-07	2002-06-05	13.7556	17	M	Ibanda	49	178						post injection paralysis	2010-01-01	7.57222	6.15					equinus of the rt foot, the forefoot with rigidity of the rt ankle joint	18/7/2017- had IM injection in childhood on rt gluteal zone. Resultant weakness of the right lower limb. Had corrective surgery at CORSU in 2013. and was discharged with an orthosis and was lost to follow up. Now has relapse. Oe: has pes cavovarus. Good dorsiflexion. previous scars of a possible tibialis posterior tendon transfer. plan: lets manipulate and cast x 3. then reassess. may need mid ta…	percutaneous ATL + POP	PT, remanipulation and casting done in 2016	right	foot	PT, muscle strengthening	remanipulation and casting done; gait has worsened, high-stepping gait but food is still supple and plantargrade			walking exercises with crutches. Walking well
469	2016-03-01	2016-04-27	2004-02-05	12.2278	15	M	Mityana							equino varus deformity with weakness of the tibialis muscles in 2013, received TPT in 2013. still has drop foot with a forefoot adductus, cast taken off and doing well	results of surgery for post injection of right foot								equino varus deformity with weakness of the tibialis muscles	had equino varus deformity with weakness of the tibialis muscles in 2013. had TPT done in 2013. still has drop foot with a forefoot adductus. Took cast off and doing well. doing well after cast taken off for remanipulation done in march 2016	calcaneal osteotomy. Anterior oblique incision, exposed the tarsal-metatarsal joints. Performed a corrective osteotomy denuding all bones of cartilage. Manipulated until corrected was achieved, lavage. Closure in layers.	PT; ambulation traning with a walker NWB one	right	foot	PT	foot is in neutral, slight drop foot in platigrade, residual hind foot varus and slight forefoot supination
470	2017-07-18	2017-11-07	2000-07-07	17.3333	18	M	Kampala	46						resultant weakness of the rt lower limb; good dorsiflexion, previous scars of a possible tibialis posterior tendon transfer	post injection paralysis rt lower limb	during childhood				IM injection			pes cavovarus	resultant weakness of the rt lower limb	triple arthrodesis	MC, trained ambulation with a walker and progressed to crutches NWB rt LL; issued a pair of axillary crutches	right	foot
471	2012-04-23	2018-03-23	2009-11-14	8.35833	10	M	Kiboga	30						paralysis of rt foot since injection, walks with a foot drop, TP tendon active, dorsiflexors- weak	PIP Rt foot	2013-02-01	3.21389	0.772222		im injection		febrile illness	foot drop	rt foot good position but no activity i.e. dorsiflexion	triple arthrodesis done. Lateral incision to the mid foot resected the talonavicular, calcaneocuboid and subtalar joints	PT; balance training and ambulation plus strengthening treatment: upper body strengthening, right knee resisted exercises and training crutch use	right	foot	elevate the limb, monitor the toes for swelling and circulation. Treat as per drug chart. For wound inspection and final cast afer 1/52	the wound has healed			Plan: to avail crutches and gait train.; RX: trained ambulation with a walker and progressed to crutches NWB rT LL, issued a pair of axillary crutches
472	2017-12-15	2018-01-24	2015-02-09	2.95833	4	M	wakiso	10							pip rt foot/ equinus deformity	2017-07-01	2.39444	0.455556	since july 2017.	IM injection		febrile illness	18/12/2017- equinus deformity rt foot	18/12/2017- reports a h/o weakness in the rt lwoer limb for 5/12. since he was taken to village ot a febrile illness and was treated with IM injection. He was standing by the time it hapepned, now he is crawling. No other complaints. Oe: has equinus deformity rt foot, reduced ms bulk. pan: PT review, start manipulation and casting. review in 2/12.	achilles tenotomy. Patient in supine position. Performed an achilles tenotomy on the rt foot. Manipulated the foot to neutral position. Applied a below knee cast, capillary refill adequate.		rt	foot	monitor toe circulation, elevate the limb, analgesia, keep cast for 4/52.		25/1/2018- d/c, remove cast in 3/52. assess MJ functioning after 3/52. avail AFO after cast removal. 22/2/2018- the foot is plantegrade. Plan: avail AFO. Day and night bracing. Review in 3/12. 23/5/2018- patient has not been properly adherent to aFO use. Shows a slight improvement. Child currently not in aFO. Plan: continue AFO and review in 3/12.	aFO	18/12/2017- seen child, able to crawl and crawl. Was walking until 4 months ago when he suddenly stopped walking. Speaks a few words at 3 yo. Has good cognition. Unable to walk without crawling. Has equinus rt foot. Flexible knee on stretching. Does like walking on parallel bars. on consultation, child will benefit from ATL. Plan: ambulate on parallel bars from home. teach walking exs and crutche…
473	2017-10-17	2018-02-01	2004-01-01	14.0833	15	F	mubende	43							PIP left foot								17/10/2017- equinus	17/10/2017- sustained an injection neuritis, they are applying casts for the foot, the foot is still in equinus. The toes are in flexion. Plan: 1) triple arthrodesis. 2) fusion of the big toe.	percutaneous achilles tendon lengthening		left	foot	elevate the limb, analgesia as prescribed. For remanipulation in 1/52 on Friday 9/2/2018.		2/2/2018- has fractional ATL done on left foot. Is doing well. No pain. Circulation in toes is good. Plan: 1) pT. 2) transfer to hostel. 3) remanipulation on Friday 9/2/2018. 9/2/2018- manipulation and casting. 12/2/2018- remanipulation done. Plan: d/c home.
474	2018-01-09	2018-02-02	2007-05-30	10.6722	12	F	kindeka	21							Rt. PIP								10/1/2018- equinus rt foot	10/1/2018- equinus rt foot in pIP. Plan: schedule for percutaneous achilles tendon lengthening	percutaneous achilles tendon lengthening		rt	foot	monitor toe circulation. Elevate the limb. For remanipulation in 1/52 on Friday 9/2/2018		5/2/2018- had ATL done. toes are swollen. is able to move toes slightly. plan: 1) transfer to hostel. 2) for remanipulation on friday. 3) for orthopedic r/v of cast. 9/2/2018- manipulation and casting. 7/3/2018- off POP today. The foot is well positioned. Plan: avail an AFO for full time bracing. Review after 1/12 for control. 4/4/2018- has just obtained the AFO. Plan: continue afo for full time …	aFO
475	2018-01-04	2018-02-09	2012-05-07	5.75556	7	M	kampala	17							PIP right foot	2015-01-01	2.65	3.00833		quinine IM injection		malaria treatment		4/1/2018- 5 yo had malaria about 3 yrs ago and was given IM quinine and developed paralysis of the right foot. Oe: no active muscles moving the foot, extensors or flexors. Plan: for percutaneous ATL. Will need triple arthrodesis in future.	percutaneous ATL		right	foot	monitor toes circulation, elevate the limb, analgesia, keep cast for 4/52.		12/2/2018- doing well. toe circulation is good. plan: d/c home through PT. 12/3/2018- ATL rt foot 4/52 ago. The foot is plantegrade. Plan:a vail AFO day and night bracing. Review in 3/12 for clinical control. 13/6/2018-the aFO is broken. Still has a foot drop. Has strong tibialis posterior muscle. Plan: to the workshop for AFO repair. review after 6/12 to plan for tibialis posterior tendon transf…	aFO	12/2/2018- ambulation on crutches PWB. 14/2/2018- Continuing therapy, ROM both knees 0/0/120, sitting on edge of the bed strengthening quads, squats, SLR.
476	2018-01-17	2018-02-09	2006-08-07	11.5056		F	jinja	31							PIP Lt. foot equinus								17/1/2018- equinus lt foot mid foot cavus	17/1/2018- equinus lt foot mid foto cavus, probably result of POP. Plan: book for percutaneous ATL lt foot. Meanwhile start serial manipulation and casting. 12/2/2018- doing well. Toe circulation is good. Plan: d/c home.	percutaneous ATL done and POP				elevate the foot on a pillow, treat as per chart, cast for 4/52.		12/3/2018- atl lt foot done 4/52 ago. Clinically the foot is plnategrade. Plan avail AFO, day and night bracing x 3/12. review in 3/12 for clinical control. 14/6/208- foot plantegrade. afo needs replacement. review after 1 year. 13/6/2019- no complaints foot plantegrade. plan: discard AFOs. review after 1 year.	aFO	17/1/2018-seen patient, on below knee pop lt leg. Rx: issued crutches, trained ambulation nwb lt, stable walked 30 meters.
477	2018-01-24	2018-02-09	2013-03-25	4.87222		F	luwero	15							Rt. PIP	2013-06-01	0.183333	4.64722	since june 2013				24/1/2018- pes equinovarus supinatus	24/1/2018- rt pes equinovarus supinatus noticed when the child was 3/12 old. Plan: start with manipulation and casting then ATL. 1/2/2018- is due for percutaneous ATL in a weeks time. Plan: re apply the cast as we wait for surgery. 9/4/2018- percutaneous ATL 8/52 ago. the cast has jsut been removed. the foot is plantegrade. plan: avail AFO. review after aFO fitting. 12/9/2018- 5/f came in for rev…	9/2/2018- percutaneous ATL done and POP				keep cast for 4/52. elevate the limb. Monitor toes circulation. Analgesia		12/2/2018- doing well. Toe circulation is good. Plan: d/c through PT.
478	2015-08-18	2018-02-09	2003-02-01	15.0222	16	M	wakiso	30							PIP Lt foot (equno-varo-supinatus)	2005-01-01	1.91667	10.6306		quinine injection			18/8/2015- equinus	18/8/2015- injected with a quinine injection at age 2 and has since had weakness in the left lwoer limb, he has been admitted due to the growing fear that the limb is continuing to deform. Clinically: cavus of the left foot, normla sensation, reduced TA and TP power, walks with an equinus but the foot is almost plantegrade on manipulation. plan: for ATL of the right foot then AFO. 14/12/2017- def…	plantar fasciotomy and metatarsal. Percutaneous plantar fasciotomy and achilles lengthening. Through dorsal incision, basal metatarsal osteotomy first and second ray done, foot plantegrade and cavus corrected closed in single layer with nylon 2/0. applied cast and foot well perfused after torniquet release.				drugs as per chart. Elevate limb on a pillow.		12/2/2018- is doing well this morning. has no new concerns. plan: d/c through PT. 5/3/2018- wounds healing fine. Foot plantegrade. Plan remove stitches and mold and fit aFO. Review in 6 weeks. 7/5/2018- the foot is plantegrade but the surgical scar is now ulcerated. Plan: continue AFO. Wound care from a nearby health unit	aFO	12/2/2018- seen patient from ward, he is doing well. Four days post operative (lt ATL and tendon transfer done). Plan: gait training with crutches NWB Lt LL. Rx: trained ambulation with a walker and progressed to crutches NWB lt LL.
479	2018-01-09	2018-02-14	2014-01-01	4.11944	5	M	wakiso	15							PIP lt foot	2016-01-01	2	2.02222		IM injection		febrile illness	9/1/2018- equinovarus foot with supination	9/1/2018- reports a h/o im injection following a febrile illness about 2 years ago. Now has deformity in the left foot. Oe: equnovarus foot with supination. Plan: start m+ c. 16/1/2018- MTC done. TCA on 23/1/2018. 23/1/2018- remanipulation done. TCA next week for cast removal and r/v by surgeon. 30/1/2018- still equinus but the mid foot deformities have corrected. plan: schedule for a percutaneou…	percutaneous ATL done and POP		lt	foot	monitor toes circulation. Keep cast for 4/52. analgesia.		15/2/2018- he doing well. Plan: 1) d/c today. 2) r/v in 4/52. on Thursday- cast removal and AFO. 3) NWB. 15/3/2018- had ATL 4/52 AGO. The foot is plantigrade. Plan: avail afo. Review in 3/12.	aFO	15/2/2018- provided crutches and walking tyre, ambulation
480	2018-02-01	2018-02-28	2009-11-20	8.27222	9	F	mukono	25							PIP rt. foot					IM rt gluteal injection			1/2/2018- pes equinovarus deformity	1/2/2018- has a rt pes equinovarus deformity. Resulting from a childhood IM rt gluteal injection. Plan: book for percutaneous ATL.	achilles tendon lengthening		rt	foot	analg as per chart. Review in 6 weeks.		1/3/2018- atl done yesterday. Plan: d/c. r/v in 4/52 for cast removal. 28/3/30218- off POP 1/12 post ATL. Plan: avail an AFO for full time bracing. Review after 1/12 for clinical control. 25/4/2019- use AFO at night. Schedule split TATT. 19/6/2019- tendon transfer. 20/6/2019- post split TAT transfer. toes pink. foot dorsiflexed. mild pain. plan: rubber tyres. r/c tomorrow r/v 6/52. cast clean and…	aFO	20/6/2019- seen patient from general ward. Post operative (tibalis anterior tendon transfer done for rt LL). Patient with a below knee POP cast. Plan: gait training NWB rt LL. Rx: trained ambulation with a walker NWB rt LL. Patient walked on general ward.
481	2017-10-12	2018-03-02	2004-09-18	13.4556	14	M	sembabule	30							Lt. foot PIP	2009-01-01	4.28611	8.78056				afebrile illness		12/10/2017- patient was given an injection at 5 years due to afebrile illness. Has a discharging wound on the left foot. Plan: review in 1 months time to stat serial manipulation and casting. Daily wound care. 19/10/2017- the wound has healed now and no edema. plan: start manipulation and casting weekly. provide crutches. review on 26/10/2017. 9/11/2017- he has a wound over the dorsum of the righ…	percutaneous ATL done and POP		lt	foot	elevate the foot, monitor blood supply to the toes, treatment as per chart. For remanipulation next week		2/3/2018- OP done. ATL right foot. 5/3/2018- child doing well. toe movement and circulation good. no pain. plan: d/c readmit on thursday. for remanipulation on friday. 9/3/2018- manipulation and casting done. 26/4/2018- he has had a POP cast for 4/52 now. clinically the foto is plantegrade. plan: to get an AFO. review with SFO. 19/6/2018- has had AFO for about 1/12 now. no new concerns. Foot is p…	aFO	19/10/2017- seen patient, measured for crutches 39". Trained ambulation with the crutches NWB, patient is stable with crutches.
482	2017-11-27	2018-05-24	2003-03-03	15.225	16	M	masaka	33							Rt foot PIP								equinus and varus	2/1/2018- manipulation and casting. r/v by surgeon in 2/52. 16/1/2018- MTC done. r/v on 23/1/2018 by surgeon. 23/1/2018- the foot has a slight residual varus deformity and the equinus is maintained. Plan: apply a new cast for 1 week. 30/1/2018- MTC done. TCA on 15/2/2018, for surgery on 16/2/2018. 26/2/2018- has ATL done. toe circulation is good. is ambulant. plan: d/c through PT. review for rema…	triple arthrodesis		rt	foot	monitor till stable. Analgesia as prescribed. Elevated right leg on pillow. Allow home tomorrow if comfortable. Cast change in 2 weeks. Wednesday 6/6/2018.		25/5/2018- had triple arthrodesis done. plan: 1) for remanipulation on friday 1/6/2018. 2) ambulate with crutches, NWB. 3) consider D/c. 28/5/2018- now he is doing well. plan: 1) transfer to hostel today. 2) wound inspection on friday. 4/6/2018- no major concerns. capillary refill good. plan: 1) provide crutches. 2) keep cast for 5/52. 3) r/v in 5/52. 17/7/2018- off pOP today. The wound healed. P…		27/11/2017- seen patient on below knee pop rt foot. Came in walking with crtuches nwb rt limb, noted crutches short and worn out. Rx: issued a new pair of crutches. 5/3/2018- seen patient post operative rt ATL done. Patient with below knee Pop cast, already had crutches. plan: gait training PWB rt LL. issue a rubber tyre. rx: trained ambulation with crutches PWB rt ll. 4/6/2018- seen patient on b…
483	2017-12-19	2018-03-07	2009-02-15	9.06111	10	M	kamuli	31							EQuinovarus rt foot due to PIP	2011-01-01	1.87778	6.96667			kamuli hospital	febrille illness	20/12/2017- equinovarus	20/12/2017- reports he was 2 years old when he was taken to kamuli hospital managed for a febrile illness however on d/c he had a weakness in the right foot. He was walking well before being taken to the hospital. No other complaints. Oe: equino varus deformity of the rt foot. plan: start serial manipulation and casting. review after 4 or 5 casts. 4/1/2017- manipulation and casting done. TCA on 1…	percutaneous ATL done and POP		rt	foot	treat as per chart, elevate the foot on a pillow, monitor the neuroascular status of the rt foot. Cast for 4/52.		9/3/2018- no cerns, good toe perfusion. plan: r/c home. r/v 4/52. 3/5/2018- the aFO is well tolerated. The foot is still plantegrade. Plan: continue full time bracing. To come again in 2/12. 5/7/2018- doing well. Plan: repair aFO. Review in 4 months. 13/12/2018- foot dorsiflexible. Plan: repair AFO- for night splinting. r/v next year- plan triple arthrodesis.	aFO	2/2/2018- availed crutched. Taught gait WNB with them.
484	2010-12-14	2018-03-07	2007-01-01	11.1833	12	F	mukono								PIP lt foot					IM injection			pes equinus	14/12/2010- h/o iM injection, has lt foot drop.plan: to workshop for AFO. Review in 6/12. 26/7/2011- no new complaints. Plan: continue with aFO. Review after 6/12. 17/12/2013- slight lateral deviation of the foot. No power of the tibia tendon. Plan: avail aFO. r/v in 6/12. 19/6/2014- doing well with AFO. has no power in both tibialis and peroneii muscles. plan: continue with aFO. review after 1 y…	percutaneous ATL done and POP		lt	foot	treat as per chart, elevate the foot on a pillow and monitor its neurovascular status. Cast for 4/52.		6/4/2018- cast has been removed today. No major concerns. Plan: apply negative csat, fit for aFO. Review in 3 months. 13/7/2018- doing well. Clinical control in 6 months.	aFO
485	2018-01-15	2018-03-07	2003-06-23	14.7056	16	M	serere	53						6/3/2018- lateral pes equinovarosupinatus 2 dgree PIP.	Lt. pes equinovarosupinatus 20. PIP	2005-01-01	1.52222	13.0389	since 2005.	im INJECTION			15/1/2018- LT Pes equiovarosupinatus	15/1/2018- he sustained paralysis of the lt foot following a childhood IM injection. Eo: has a lt per equinovarosupinatus. Plan: M+C, then triple arthrodesis. 23/1/2018- remanipulation done r/v in 2/52. 6/2/2018- manipulation and casting done. TCA in 2/52. 20/2/2018- remanipulation done. TCA for admission on 6/3/2018. 6/3/2018- condition followed IM injection at age of 2 years and noted gradual d…	achilles tendon lengthening done				monitor vitals till stable. Analgesia as per prescription. Allow home Friday this week. Schedule remanipulation +/- triple arthrodesis in 2 weeks 21/3/18.		22/3/2018- has ATL done a week ago, followed by M+C yesterday. is due for M+ C in OPD on thursday in 2 weeks. plan: 1) d/c home. 2) r/v in 2 weeks for m+ c on a thursday in OPD. 8/5/2018- off POP today following serial manipulation and casting. The foot is well positioned and can dorsiflex about 5 degrees. Plan: avail an AFO with a hinge for full time bracing. Review after 1/12 for control. 12/6/…	aFO	15/1/2018- issued a pair of elbow crutches. Gait training done NWB lt ll
486	2017-12-11	2018-03-14	2001-06-05	16.775	18	M	wakiso	35							left PIP	2009-01-01	7.57222	8.94444		IM injection			11/12/2017- equionvarus deformity	11/12/2017- reports a h/o IM injection when 8 years old. Later noticed paralysis and weakness in the left foot. Managed in several hospitals with no improvement. OE: lt foot -equinovarus deformity. Plan: book for STR. 4/1/2018- 1st M+ C done. TCA- 11/1/18. 2nd M+C done. TCA on 18/1/2018. 18/1/2018- M+ C done. TCA on 25/1/2018. 25/1/2018- manipulation and casting done. TCA next week. 1/2/2018- rem…	percutaneous achilles tendon lengthening				treat as per chart. Elevate the foot on a pillow. Monitor the neurovascular status of the foot. Cast for 4/52.		12/4/2018- percutaneous ATL lt foot 1/12 ago. The foot is plantegrade plan: avail aFO, review with aFO. 14/6/2018- is doing well on the aFO and reports an overall improvement. Is ambulant without crutches. No new concerns. Plan: continue with the aFO. review in 2/12. 14/8/2018- he is doing better, there is a slight drop foot whe he walks, he is using the aFO day and night. plan: for day time AFO …	aFO	4/1/2018- rx: taught child how to use wooden crutches// child fully independent. 15/3/2018- seen patient post lt percutaneous ATL with below knee POP cast. Plan: gait training with crutches PWB lt LL. Rx: ussed a used a rubber tyre. Trained ambulation with a walker and later progressed to crutches. PWB lt LL.
487	2018-02-14	2018-03-16	2012-06-05	5.78056	7	F	kibaale	15							pip right leg	2015-08-01	3.15556	2.53611		IM injection		malaria treatment		14/2/2018- 5yrs/f came in with right lower limb weakness with foot drop, symptoms followed iM injection in management of malaria illness 2.5 years ago. Plan: book for ATL right foot. 22/2/2018- done manipulation and casting today. TCA next week. 1/3/2018- mTC done TCA on 8/3/2018.	percutaneous achilles tendon lengthening				treat as per chart. Elevate the foot on a pillow and monitor its neurovascular status. Cast for 4/52.		19/3/2018- d/c home. ambulate with crutches. r/v in 4/52. 19/4/2018- 1 month post ATL, the foot is in a good neutral position, she is off the cast today. Plan: lets measure her an AFO. Review her with the aFO. 21/6/2018- doing well with the aFO. Plan: review her in 4 months. Continue with daily AFO use. 18/10/2018- 4 months on an aFO, foot is much better, no dorsiflexion but its held and plantegr…	aFO	19/3/2018- seen patient post aTL. She is ambulant with crutches PWB (caretaker reports she left them at home).. Availed a walking tyre.
488	2017-12-14	2018-03-16	2009-09-10	8.51667	9	F	mukono	22							PIP left foot								14/12/2017- cavovarus	14/12/2017- Pip left foot, has been using an AFO for 5 years, now the foot is in a cavovarus, there is no equinus. But she has a drop foot. Plan: for triple arthrodesis of the left foot in march.	plantar fasciotomy done. Left achilles lengthening and plantar fasciotomy was done. Foot in plantegrade position. Applied cast, foot well perfused.		left	foot	drugs as per chart. Remove cast in 4 weeks, mold and fit AFO.		16/4/2018- foot much better position. Plan recast for 4 weeks then fit AFO. 14/5/2018- the cast has been removed today. the position of the foot is plantegrade. plan: avail AFO day and night bracing. to come again in 6/52. 29/6/2018- has weak tibialis anterior and posterior activity. continue aFO day time. r/v in 6 months consider triple arthrodesis. 18/12/2018- she still has hind foto varus with…	aFO	19/3/2018- refered for crutches. able to walk with support. rx: walking exs with crutches (37"). walking well. plan: review next ortho visit. 25/2/2019-seen patient post operative (triple arthrodesis done for lt LL). Child with a below knee POP cast .already had crutches. RX: trained ambulation ith crutches NWB lt ll. Child stable with crutches and was able to walk on general ward corridor.
489	2018-02-13	2018-03-19	2003-02-02	15.1306	16	M	wakiso	32							pip left leg with equinovarus deformity left foot					IM injection	mulago hospital	sickle cell	13/2/2018- left foot equinovarus deformity	9/2/2018- noted child with flexion contracture right middle finger following a cut on volar aspect of PIPJ 10 years ago. currently able to use FDP but not FDS of same finger. xray also show a joint contracture and camptodactyly. patient wants a release done but the team is still worried of a failed release due to camptodactyly. plan: to be seen by dr. praveen. 13/2/2018- 15 yr/m came in with left…	triple arthrodesis				abx and analg as per chart. For wound inspection and final remanipulation next Wednesday.		21/3/2018- called to r/v with known sickle compalint. severe back pain. pain in both knees, abodminal pain and bloating. O/E: tendon and ertebrae, 28/3/2018- manipulation and casting done. 22/3/2018- child had cast split but has no sensation in last 3 toes. toes are warm however. plan: 1) remove cast. 2) put backslap. 3) frequent reviews through the day. rejuvants and analgesia. 23/3/2018- review…	aFO	13/2/2018- seen patient on below knee pop lt lef. Rx: issued crutches, trained ambulation nwb lt leg, patient stable walked 50 meters.
490	2018-02-27	2018-03-28	2008-06-06	9.81111	11	M	isingiro	25							PIP right foot								27/2/2018- equinovarus	27/2/2018- equinovarus foot after an injection trauma, has a cavovarus foot, he has pain in the right ankle malleolus, plan: for ATL right foot. 27/3/2018- off POP today, equinus rt foot. Plan: admit on the ward for ATL tomorrow. Condition diagnosed in 2015 following IM gluteal injection and started getting ambulation difficulties. has pain at ankle of same lower limb with cavocarus foot. ambulan…	percutaneous ATL done and POP		right	foot	treat as per chart. Elevate the limb. Cast for 4/52.		24/4/2018- off the cast today, the foot is in plantegrade postion. Plan: lets measure an aFO. Review him with the aFO. AFO for 4 months, then review for control.	aFO	27/2/2018- seen patient, on pop below pop rt leg. Rx: issued crutches, trained ambulation using crutches nwb rt. Patient is stable walked independently with crutches 35 meters. 29/3/2018- seen patient, he is already ambulant with crutches. Availed a wlking tyre and taught gait PWB. 27/4/2018- seen patient post ATL rt foot, off pop. complains crutch pressure axillar. has an afo fitted. rx: issued …
491	2018-03-15	2018-04-04	2007-05-10	10.9	12	F	alebtong	35							pip lt foot					IM injection		snake bite to left leg	15/3/2018- pes equinovarus	15/3/2018- has a deformity of the lt foot which started after a snake bite to the lt leg. Oe: has a flexible pes equinovarus of the left foot. Plan: book for percutaneous ATL.	achilles tendon lengthening done				for remanipulation in 1/52. analgesia. Plan for tight FHL- lengthening. Ambulate with crutches.		5/4/2018- foot over dorsiflexed. pt is stable. had a fair night night with no issues. rx given and obs charted. plan: 1) change cast to neutral position. 2) allow home. 3) r/v in 4/52. 4) consider resection of flexor tendons or arthrodesis of interphalangeal joint big toe. 17/5/2018- pop off today. No pain is reported. The foot is at 90 degrees, but there is hind foot varus and moderate supinatio…		5/4/2018- seen patient from the ward, found her lying in bed. Plan: ambulation pwb with crutches. Rx: ambulation pwb with a walker. Progressed to crutches pwb, patient is stable on crutches. Availed crutches.
492	2018-04-05	2018-04-25	2011-10-25	6.5	7	M	wakiso	15							pip right foot	2013-03-01	1.35	5.09444		gluteal im injection		febrile illness		5/4/2018- reports child was fine until 1.5 years of age, when he had a febrile illness and was injected with unspecified medicinethat crippled the childs right leg. Plan: to book for aTL right foot. 24/4/2018- HPI: condition resulted following gluteal IM injection at 1.5 years. booked for atl. OE: fair general condition. afebrile to touch. PA: soft non tender. R/S: cast is clear. plan: 1) consent…	achilles tendon lengthening				remanipulation in 1/52. analgesia.		25/4/2018- post ATL. has normal pain, vitals normal. no new comcerns at 6 pm. at 8 pm: child has moderate pain- crying of scale 5 score. given IM petrline 25 mg. 26/4/2018- patient is calm. pain controlled. 26/5/2018- no concerns. plan: remanipulation at OPD on thursday. POP stays for 3/52. need AFO. allow home. 7/5/2018- he is doing well. capillary refill adequate. plan: 1) d/c today. 2) r/v in …	aFO	26/4/2018- assessed pt reports no complain. OE: lost sensation of big 2nd and 3rd toes. Could not move toes rt foot. Plan: health educate the mother. Issue crtuches. Train gait using crutches. Rx: healht educated the mother. Issued crutches. Taught gait using crutches PW. 7/5/2018- remanipulation foot, POP, tyre shoe provided.
493	2010-12-20	2018-04-26	2002-06-04	15.8944	17	F	kampala								PIP rt foot	2004-01-01	1.575	6.96944					21/12/2010- equinus varus supinatus	21/12/2010- child presents with rt foot drop result of injection at 1 year of age. Now has equinus varus supinatus rt foot. Plan: for plantar fasciotomy and tibialis posterior transfer to the cuboid. 4/1/2018- lost follow up about 7 years due to financial issues. now still has a foot drop in the rt. was oeprated about 8 years in corsu with some improvement. oe: equino varus rt foot. plan: book fo…	triple arthrodesis				monitor till stable, rest right leg of pillow, analgesia as per precsription, cast for 10 weeks, change cast in 2 weeks Wednesday 9/5/2018.		7/6/2018- triple arthrodesis rt foot, was done 6/52 ago. The cast was stopped too early (after just 2 weeks) she reports some pain in the midfoot with on and off swelling. Clinically the foot is plnategrade and the wound has healed well. Plan: continue day and night AFO. to come again after 6/52. 19/7/2018- pain has subsided. foot is plantegrade. plan: repair shoe in workshop. continue with full …	aFO	27/4/2018- assessed pt reports dizziness. Plan: issue crutches. Train ambulation using crutches. Strengthen ll rt. rX: health educated the pt. SLR X10. knee raises x 10. issued crutches metallis. Trained gait using crutches PWB.
494	2018-02-13	2018-05-02	2004-02-02	14.25	15	F	amuria	44							Rt. PIP					IM quinine injection			13/2/2018- pes equiovarus supinatus	13/2/2018- result of IM quinine injection has PIP rt lower limb with a pes equinovarus supinatus. Plan: lets start serial manipulation and casting. Review when needed. 22/2/2018- remanipulation done. TCA next week. 1/3/2018- MTC done. TCA on 15/3/2018. 15/3/2018- remanipulation done. TCA next week. 12/4/2018- has a residual equinovarus. book for percutaneous aTL.	percutaneous aTL		rt	foot	monitor toe circulation. Analgesia. For remanipulation next week on wed 9/5		3/5/2018- had percuteaneous ATL done. Doing well. Toe circulation good. plan: 1) for remanipulation next week. 11/6/2018- foot plantegrade. Apply a short leg walking cast for 4 weeks. 23/10/2018- there is no pain, foot is plantegrade, plan: lets measure an aFO for the right foot. Review her with the AFO.	aFO	13/2/2018- seen patient on below knee rt. Rx: issued crutches, trained ambulation nwb rt leg, she is stable, walked up to hostel- 150 meters. 3/5/2018- ambulation on crutches, movement of the toes. 10/5/2018- patient is able to move toes, ambulant on crutches, ready to be discharged.
495	2013-09-20	2018-05-04	2004-06-24	13.8611	15	F	wakiso	58							PIP right foot,	2008-01-01	3.51944	5.71944					11/1/2018- calcaneal varus of right foot	11/1/2018- she was injected about 10 years ago and has been undergoing physio for the last few years, she now walks with no drop foot but has a calcaneal varus of the right foot and a tight achilles tendon plan: for calcaneal osteotomy right foot and ATL.	calcaneal osteotomy- percutaneous lengthening of the rt heel cord. Lateral approach to the rt calcaneo oblique osteotomy with lateral translation of the distal segment to correct the heel varus. Fixed with two threaded k -wires.				elevate the foot on a pillow and monitor sensation, movement and circulation of the toes. Treat as per chart. Cast for 6/52.		26/6/2018- she has 2 wires in the foot the aFO has been availed, she is still on PWB. Plan: remove the k -wires. To use AFO daily for 3 months. Review her in 3 months. 4/1/2019- she still has a slight drop foot, she has improved tremendously. Plan: continue with the AFO at night. PT.	aFO	5/5/2018- seen pt from ward. She reports to have had a painful night but was controlled by analgesics. O: soiled cast on the lateral side due to bleeding. Inability to move the toes. Intact sensation. Rx: health educated on essence of ambulation immediately after surgery. passive movements of the rt toes. straight lef raises 10 degrees. knee bends. 7/5/2018- patient can move toes and is ambulant …
496	2017-05-17	2018-05-08	2012-02-15	6.23056	7	M	wakiso	18							right PIP	2016-01-01	3.87778	1.37778				febrile illness	17/5/2017- cavus varus equino deformity	17/5/2017- h/o febrile illness one year prior to this visit managed with injection latter developed right lower limb. Weakness with progressive cavus varus equino deformity. Oe: bearing weight on lateral border of foot. Plan book for TP tendon transfer + aTL. 2/2/2018- has rigid hind foot varus and mid foot adductus. plan: care for skin wounds. stage one: calcaneal osteotomy. stage 2: split TP te…	calcaneal osteotomy. Performed a percutaneous lengthening of the rt tendon achilles. Lateral approach to the rt calcaneus. Performed an oblique osteotomy and translated the distal segment to correct the hindfoot varus. Fore foot adductus is still present. lavaged with saline.				treat as per chart, for wound inspection in theater next Wednesday. Elevate the foto on a pillow and monitor sensation, movement and circulation of the toes. Will need tibialis posterior transfer as a second procedure later.		9/5/2018- had triple arthrodesis done. plan: 1) ambulate with crutches. 2) remanipulation next week. 3) discharge. 4) r/v next week. 21/6/2018- 6/52 post calcaneal osteotomy. Pain well controlled and wounds have healed well. Foot is plantegrade but with some residual adductus. Plan: remove the k wires and reapply cast for 5/52. 27/7/2018- cast has been removed, foot has mild varus. plan: avail AF…	aFO	9/5/2018- pop applied. Patient is able to move toes, provided crutches, ambulation possible with little assistance by the mother. 17/5/2018- cast applied after wound inspection yesterday, patient is ambulant.
497	2017-09-12	2018-05-11	2003-08-05	14.7667	15	M	kampala	60							left pip								12/9/2017- mild left pes planus varus metatarsus adductus	12/9/2017- rigid but mild left pes planus varus metatarsus adductus result of pip. Plan: schedule for triple arthrodesis	percutaneous ATL done and POP				treat as per chart. Elevate the foot on a pillow. Monitor the sensation, circulation and movement of the toes. Cast for 6/52.		14/5/2018- doing well, capillary refill good. plan: 1) d/c today. 2) r/v in 4/52. 3) crutches NWB. 15/5/2018- 1) discharge today. 2) r/v in 6/52. 28/6/2018- off cast today, foot is plantegrade. Plan: lets avail hi mwith an aFO. Review him with the aFO. 13/11/2018- the foot is plantegrade, there is no visible foot drop, he is using the AFO day and night. Plan: continue AFO use during the day, revi…	aFO	14/5/2018- rx: trained ambulation with a walker then crutches NWB. 12/5/2018- seen pt from 1st day po, he reports not have ambulated. Rx: ambulation training done with a walker. Plan: availed a walker for use. r/v on Monday for crutch training.
498	2018-02-26	2018-05-21	2004-03-25	14.1556	15	M	moyo	32							PIP Lt foot								6/4/2018- cavovarus with an equinus of the foot	6/3/2018- remanipulation done TCA next week. 15/3/2018- remanipulation done. TCA next week. 6/4/2018- the foot is much more flexible now but still has a cavovarus with an equinus of the foot. Plan: for triple arthrodesis of the foot when ready.	triple arthrodesis				elevate the limb and monitor the toes for swelling and circulation. Treat as per drug chart. For wound inspection and final cast after 1/52.		22/5/2018- hard triple arthrodesis. Toe circulation and sensation. Plan: intact. Plan: avail crutches for MVB. Allow to hostel for wound inspection. 30/5/2018- manipulation and casting. 31/5/2018- toe circulation intact. sensation good. plan: allow home. keep cast for 6/52. 19/7/2018- noted foot is plantegrade, no pain reported. Plan: AFO full time for 3/12.	aFO	6/3/2018- refered for crutches. Able to stand and walk when supported. Rx: walking ex s with crutches. Walking well. Plan: ct exs from hostel. 22/5/2018- patient can move toes, is ambulant on crutches, gave out new crutch pods. 31/5/2018- ambulation on crutches. NWB, patient is able to move toes.
499	2017-05-22	2018-05-28	2013-05-05	5.06389	6	M	kampala	14							right PIP								22/5/2017- right foot drop	22/5/2017- right foot drop typical of pIP. Dorsiflexors and peroneal weak, tibialis posterior 5/5. plan tibialis posteiror tendon transfer preferably holidays.	TP tendon transfer. Medial approach to the foot over the calcaneocuboid joint, identified the TP tendon, via an anteromedial distal tibial incision, identified and retracted the TP tendon, secured the Tp tendon with a vicryl 2 suture. Tracked the tendon through the interosseus membrane and to the foot via a lateral incision and later under the retinaculum to the lateral cuneiform bone, made a tun…				analg as per chart, elevate the limb		29/5/2018- doing well and toe circulation is good. plan: 1) reinforce cast (NWB). 2) r/v in 6/52. tyre shoes. 12/7/2018- cast is off, foot is plantegrade. Plan: lets measure an aFO. Reapply cast for 1 week with iodine dressing. 267/2018- plan: dischard crutches. aFO full time. Review after 3/12. 25/10/2018- foot is plantegrade. Active ankle flexion 0 degrees, passive 5 degrees. plan: muscle train…	aFO	29/5/2018- ambulation on crutches, issued crutches. 25/10/2018- review. 1st assessment in therapy. OE: walking with AFO. Independently. Able to perform all activities of living. Rx: TENS x 20 min. exs: plan: review weekly TCA 1/11/18. 1/11/2018- seen patient for review, mum happy with the improvement, able to walk with the aFOs but with foot drop. rx: muscle stimulation with step ups. walking up …
500	2018-03-26	2018-06-13	2007-07-07	10.9333	12	M	mubende	36							PIP left foot	2017-01-01	9.48333	1.23611					27/3/2018- drop foot, severe heel varus, and forefoot adductus	27/3/2018- PIP left foto following injection trauma about 1 year ago. She has been on M&C, 2 casts applied so far, she has a drop foto and a severe heel varus and forefoot adductus, plan: continue with M&C. review her in 1 month to plan for a surgery, triple vs calcaneal osteotomy. 24/4/2018- the foto is better now, plan will benefit from a triple arthrodesis	triple arthrodesis				monitor till stable, elevate limb on pillow, and monitor toe circulation, split cast if inadequate toe perfusion. Cast for 8 weeks. Change cast in 4 weeks in OPD.		14/6/2018- toe circulation and sensation instact: pain well controlled. Plan: d/c home r/v in 4/52 for cast change and keep cast	aFO	14/6/2018- manipulation done, POP applied, ambulation
501	2018-01-08	2018-06-13	2008-05-02	10.1139	11	F	wakiso	25							left PIP								9/1/2018- equinocavovarus	9/1/2018- PIP left foot, she has a bursitis over the dorsum of the left foot. Infected bursitis, she suffered an injection neuritis several years ago and has developed a gradual equiocavovarus of the left foot, clinically: bursitis, tender, not hot, severe equinus, cavovarus. plan: avail axillary crutches for NWB. cap cloxa 250 mg tds for 10 days. tab cetamol 500 mg tds for 5 days. review in 1 mo…	calcaneal osteotomy-did fractional lengthening of the achilles tendon and triple arthrodesis.				analg as per chart		14/6/2018- has triple arthrodesis done. toe circulation good. plan: 1) d/c. r/v in 2/52. 2) reinforce cast. 26/6/2018- reapply the cast, it has been 2 weeks post op. review her in 6 weeks for clinical control.l 7/8/2018- she is off the cast today. The foot is in a slight equinus. Plan: measure an aFO, review her with the aFO for further instructions. 15/8/2018- had aFO given. plan: day and night …	aFO	9/1/2018- trained ambulation nwb with crutches. Availed crutches. 14/6/2018- refered for crutches. Rx: walking exs with crutches. Walking well.
502	2018-05-22	2018-06-27	2012-12-12	5.54167		M	mpigi	16							Lt. PIP								22/5/2018- lt pes equiovarus supinatus in PIP	22/5/2018- lt pes equinovarus supinatus in PIP. Plan: schedule for percutaneous ATL lt. will require reassessment for possible tendon transfer in the future after the ATL.	percutaneous ATL done and POP				analgesia, elevate the limb. Monitor toe circulation 4 hourly for 24 hours. For remanipulation in one week.		28/6/2018- had atl done, capillary refill good. plan: 1) d/c today. 2) remanipulate in 1/52. 4/7/2018- manipulation and casting done. 6/8/2018- cast is removed, slight varus, plan: avail aFO, review with AFO. 11/10/2018- foot is plantegrade. Shoes need repair. Plan: continue AFOs full time for 3/12. repair shoes in workshop.5/7/2018- doing well. plan: 1)d/c today. 2) r/v in 4/52. 16/1/2019- walks…	aFO	28/6/2018- seen pt, mother reports that he is not yet ambulant. Rx: health educated on essence of using a walking aid while ambulating. Trained walking with a walker then crutches NWB. Plan: issued a pair of crutches (33")			2018-07-03	percutaneous ATL
503	2018-06-11	2018-07-11	2011-11-21	6.63889	7	M	gomba	21							PIP right foot	2017-01-01	5.11111	1.44444		IM injection			11/6/2018- equinus and foot adductus	11/6/2018- hx of IM injection about 1 year ago and developed right foot deformity. Managed with AFO apparently but no improvement. Has an equinus and foot adductus. Plan: do serial m&x and will need triple arthrodesis later.	percutaneous ATL done and POP				limb elevation. 2 hourly monitoring of toe circulation and sensation. Analgesia. Consider d/c tomorrow.		12/7/2018- had ATL done. no new concerns today. plan: avail tyre shoes for walking. r/v in 6/52. d/c home. 20/8/2018- he is doing well. Plan avail aFO at OWS. Review with aFO. 6/12/2018- broken aFO. No active peroneals. Plan: schedule tripel arthrodesis rt foot. 20/2/2019- percutaneous ATL done and pop. 21/2/2019- doing well post TPT transfer. cast well tolerated. plan: reinforce cast over foot. …	aFO	11/6/2018- seen patient refered for crutches. Measured for crutches 37". Trained ambulation NWB with crutches, patient is stable on crutches. 12/7/2018- seen patient and fitted in POP tyre and trained mother how to put them on.
504	2018-05-30	2018-07-11	2013-04-06	5.26389	6	M	kampala	21							PIP								30/5/2018- right foot equinus	30/5/2018- was born with a normal foot, but reportedly had injections on the limb in childhood according to the attendant. Was managed severally and subsequently developed right foot equinus. 28/6/2018- post manipulation and casting. Plan: lets book him for an atl.	percutaneous ATL done and POP				limb elevation, analgesia as required. Keep cast for 4/52. monitor toe circulation and sensation 2 hourly.		12/7/2018- had ATL done. toe circulation and sensation intact. plan: D/C home. avail walking tyre. crutches NWB r/v 4/52. 6/8/2018- foot plantegrade, mold and fit AFO. Review in 6 weeks. 17/9/2018- has been using AFO day and night x 6/52. currently the aFO is loose. The foot is plnategrade. Plan: continue aFO. Workshop to repair the aFO. Review in 6/52. 29/10/2018- the orthosis is broken and was …	aFO	30/5/2018- seen patient after casting. Plan: gait training NWB rt ll. Rx: trained ambulation in parallel bars and later progressed to crutches. NWB rt ll. Child is quite stable with crutches. Encouraged to practice more from home. 12/7/2018- seen patient and fitted in POP tyre and trained mother how to put them on.
505	2018-04-17	2018-07-13	2009-01-01	9.53333	10	M	Masaka	20							PIP left foot								17/4/2018- equinovarus	17/4/2018- PIP left foot, was managed in masaka previously and lost to follow up. The foot is now returning to an equinovarus, clinically: has an equinus and forefoot adductus with an inversion of the foot, he has a small wound on the lateral malleolus but not connecting to the bone. plan: m+C then ATL. 5/6/2018- still having a drop foot, off the cast today, walks with a drop foot and there is a …	triple arthrodesis				analgesia as precsribed. POP for 6/52.		16/7/2018- reports abdominal pain. 1) abx. 2) remanipulation on friday. 3) ambulation. 4) d/c. 20/7/2018- manipulation and casting done. 6/9/2018- no complaints today. had triple arthrodesis done 6 weeks ago. clinically, foot is plantegrade, wound is clean with no obvious discharge. plan: remove stitiches. immobilize in aFO. 4/10/2018- has come in for review, reports has forgotten AFO at home. pl…	aFO	plan: provision of crutches. Ambulation. RX: crutches provided. Ambulation training done through the OPD ward corridor.
506	2018-04-27	2018-07-17	2004-06-05	14.1167	15	M	kyotera	30							left PIP foot									27/4/2018- has been casted in masaka for the past one month. Plan: book for triple arthrodesis. 17/7/2018- 14 m with PIP left foot, mother not sure of hx because child has been staying with grandmother, reports child was born with normal feet. Due today for tripe arthrodesis with an impression of CTEV. O/E: afebrile, m: noted pop cast. ambulating on crutches. cast: clear. imp: left CTEV. pIP left…	triple arthrodesis		left	foot	monitor vitals and toe circulation till stable. Analgesia. Remanipulation in 2 weeks. Tuesday 31/7/2018.		178/7/2018- no complaints today. 1) d/c home. 2) remanipulation in 4/52. 1/8/2018- manipulation and casting done. 2/8/2018- d/c home. r/v in 5/52. ambulate with crutches. 11/9/2018- patient has had cast removed today. o/e: peeling of skin left foot, incision site clean and dry. Plan: remove stitches today. Apply another cast for 6/52. 23/10/2018- the foot is in a plantegrade position, there is a …	aFO	2/8/2018- seen patient from the ward, noted he has old worn out crutches. Measured for crutches 43". Trained ambulation wnb with them, patient is stable on crutches.
507	2018-07-06	2018-07-25	2011-04-05	7.30556	8	F	kaliro	26							PIP lt. LL	2015-01-01	3.73889	3.51389	since 2015				6/7/2018- rigid equinus and cavus	6/7/2018- reportedly well until the age of 4. while living with the grandmother, developed gradual abnormality in walking with associated deformity in the lt foot. L/E: rigid equinus and cavus. Paraesthesia of the first web-space. Plan: book for ATL.	percutaneous ATL done and POP				limb elevation, analgesia, monitor neurovascular status of foor 2 hourly		26/7/2018- patient feels soe pain in foot. plan: 1) avail crutches with PWB. 2) walking tyre. 3) allow home. 4) r/v in 6/52. 7/9/2018- post ATL. Doing well, foot is plantegrade. Plan: aFO. Clinical control in 6 weeks. 19/10/2018- reports some mild pain in the left foot result of pressure from aFO. No other issues. Plan: lets continue AFO. Review in 2 months. Avail soft padding in AFO. 3/1/2019- n…	aFO	26/7/2018- seen patient. Post operative (lt ATL done). She c/o pain in the lt ll. Plan: gait training PWB lt ll. Rx: trained ambulation in parallel bars and progressed to crutches PWB lt ll.
[truncated: 15 more rows]
[truncated: 2 more columns]
